# Supplementary material for: Organocatalytic [4+1]-annulation approach for the synthesis of densely functionalized pyrazolidine carboxylates
Source: Royal Society of Chemistry journal article supplement (doi:10.1039/c5ra09583b), 2015-01-01
Supplement: c5ra09583b1.pdf [file c5ra09583b1.pdf]

## **Electronic Supplementary Information(ESI)**

Komal G. Lalwani, Ravindra D. Aher and Arumugam Sudalai\*

Chemical Engineering & Process Development Division, CSIR-National Chemical Laboratory,  
Dr. Homi Bhabha Road, Pune, Maharashtra, India- 411008.

\*Corresponding author: Tel.: +91 20 25902547; Fax: +91 20 25902676;  
e-mail: [a.sudalai@ncl.res.in](mailto:a.sudalai@ncl.res.in)

| <b><u>Table of Contents</u></b> |                                                                          |                 |
|---------------------------------|--------------------------------------------------------------------------|-----------------|
| <b>Sr.No.</b>                   | <b>Description</b>                                                       | <b>Page No.</b> |
| 1                               | <sup>1</sup> H and <sup>13</sup> C NMR Spectra                           | 19-43           |
| 2                               | <sup>1</sup> H NMR Spectra in DMSO-d <sub>6</sub> at 70 °C of 4c, 5c, 5f | 44-46           |
| 2                               | IR Spectra                                                               | 46-49           |
| 3                               | HRMS                                                                     | 50-61           |
| 4                               | HPLC data                                                                | 62-76           |
| 5                               | COSY and NOESY spectra of <b>5g</b>                                      | 77-78           |
| 6                               | Crystal data of <b>4f</b>                                                | 79-80           |

## EXPERIMENTAL SECTION

### 1. General Information

Solvents were purified and dried by standard procedures before use; petroleum ether of boiling range 60–80 °C was used. Melting points are uncorrected. Optical rotations were measured using sodium D line on a polarimeter. <sup>1</sup>H NMR and <sup>13</sup>C NMR were recorded on 200, 400, 500 MHz NMR spectrometers. HRMS data for new compounds were recorded using Orbitrap mass analyzer associated with Accela 1250 pump. HPLC was performed with variable wavelength detector. Column chromatography was carried out by using silica gel of the selected particle size of 100-200 mesh or 230-400 mesh. D-proline, L-proline and diazadicarboxylates were purchased from Sigma-Aldrich. Racemic proline was prepared by mixing of both the enantiomers before use.

### 2. General Experimental Procedure:

(a) **Preparation of sulfur ylide:** NaH (5 mmol, previously washed with petroleum ether to remove oil) was added to an oven-dried three-necked flask, followed by the addition of dry DMSO (15 mL) through a septum to it, and the whole slurry was stirred at 25 °C under N<sub>2</sub> atmosphere. Then trimethyloxosulfonium iodide (5 mmol) was added to the slurry over a period of 5 min *via* a solid addition funnel and stirred until it became a homogenous solution.

(b) **Sequential  $\alpha$ -Amination/Wittig Olefination/Corey–Chaykovsky Reaction:** To a cold solution of azadicarboxylate (2.5 mmol) and L-proline (10 mol %) in dry CH<sub>3</sub>CN (25 mL) at 0 °C was added aldehydes (**2a-k**, 3 mmol) and the mixture was stirred for 3 h at 0 °C. Then ethyl 2-(triphenyl- $\lambda^5$ -

phosphanylidene) acetate (3.75 mmol) was added and stirred further for 45 min. This was followed by the addition of a solution of dimethyloxosulfonium methylide (5 mmol) in dry DMSO at 25 °C and allowed to stir for 2 h at the same temperature. The progress of the reaction can be monitored by TLC. It was then quenched by the addition of an aq. NH<sub>4</sub>Cl solution. The mixture was concentrated in vacuum to remove acetonitrile, and concentrate was extracted with EtOAc (3 × 30 mL). The combined organic layers were washed with brine, dried over anhyd Na<sub>2</sub>SO<sub>4</sub>, and concentrated under reduced pressure to give the crude products, which were then purified by flash column chromatography (230-400 mesh) using petroleum ether and ethyl acetate as eluents to afford the pure products **4a-k**.

(c) **Sequential  $\alpha$ -Amination/Wittig Olefination/N-alkylation/Michael Reaction:** To a cold solution of azadicarboxylate (2.5 mmol) and L-proline (10 mol %) in dry CH<sub>3</sub>CN (25 mL) at 0 °C was added aldehydes (**2**, 2.5 mmol) and the mixture was stirred for 3 h at 0 °C. Then ethyl 2-(triphenyl- $\lambda^5$ -phosphanylidene) acetate (3.75 mmol) was added and stirred further for 45 min. This was followed by the addition of ethyl bromoacetate (3.75 mmol) and Cs<sub>2</sub>CO<sub>3</sub> (6.25 mmol) and allowed to stir for 6 h at 50 °C. The progress of the reaction can be monitored by TLC. It was then quenched by the addition of an aq. NH<sub>4</sub>Cl solution. The mixture was concentrated in vacuum to remove acetonitrile, and concentrate was extracted with EtOAc (3 × 30 mL). The combined organic layers were washed with brine, dried over anhyd Na<sub>2</sub>SO<sub>4</sub>, and the concentrated under reduced pressure to give the crude products, which were then purified by flash column chromatography (230-400 mesh) using petroleum ether and ethyl acetate as eluents to afford the pure products **5a-h**.

(d) **Synthesis of 1,3-diamino acid 7 by N-N reduction of pyrazolidines 4:** NH<sub>3</sub> was bubbled into a solution of pyrazolidine **4** (0.2 mmol) in THF (10 mL) at -78 °C, until approximately 10 mL were condensed. Excess Na was added and the solution turned dark blue. The resulting mixture was stirred at -40 °C for 1 h. Then the reaction was quenched by careful addition of solid NH<sub>4</sub>Cl, and NH<sub>3</sub> was allowed to evaporate slowly. The residue was diluted with EtOAc (15 mL) and filtered, and the solvents were

evaporated in a rotary evaporator. The resulting residue was purified by flash chromatography over SiO<sub>2</sub>, with hexane/ethyl acetate/NEt<sub>3</sub> 20/1/1 as eluent, to give 1,3-diamino acid **7** as spectroscopically pure, colorless syrup.

Diisopropyl (3*R*,4*S*)-3-benzyl-4-(2-ethoxy-2-oxoethyl) pyrazolidine-1,2-dicarboxylate (R' = *i*Pr, **4a**)

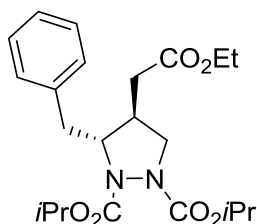

**Yield:** 841 mg, 80%; gum;  $[\alpha]_D^{25} +17.156$  (c 1.2, CHCl<sub>3</sub>); 86% ee (Chiracel OD-H 250 x 4.6 mm), *n*-hexane/*i*-PrOH, 95:5, 0.5 mL/min, 220 nm), *t<sub>r</sub>* = 18.190 min (major), *t<sub>r</sub>* = 20.973 min (minor); IR (CHCl<sub>3</sub>, cm<sup>-1</sup>) *v*<sub>max</sub> 701, 741, 921, 1029, 1197, 1187, 1238, 1316, 1340, 1375, 1467, 1701, 1733, 2981, 2358; **<sup>1</sup>H NMR** (200 MHz, CDCl<sub>3</sub>): δ 1.12-1.31 (m, 15H), 2.18 (d, *J* = 7.5 Hz, 2H), 2.54-2.60 (dd, *J* = 4.1, 7.2 Hz, 1H), 2.61-2.70 (dd, *J* = 4.6, 11.2 Hz, 1H), 2.90-3.00 (m, 2H), 4.03-4.28 (m, 4H), 4.82-5.05 (m, 2H), 7.24-7.28 (m, 5H); **<sup>13</sup>C NMR** (50 MHz, CDCl<sub>3</sub>): δ 14.0, 21.6, 21.7, 21.9, 37.2, 40.2, 41.3, 51.7, 60.4, 65.4, 69.6, 69.8, 126.4, 128.2, 129.2, 137.3, 156.0, 156.2, 170.7; HRMS (ESI) Calcd for C<sub>22</sub>H<sub>33</sub>O<sub>6</sub>N<sub>2</sub> [M + H]<sup>+</sup> 421.2333; Found 421.233.

Diethyl (3*R*,4*S*)-3-benzyl-4-(2-ethoxy-2-oxoethyl) pyrazolidine-1,2-dicarboxylate (R' = Et, **4a**)

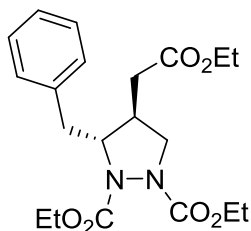

**Yield:** 775 mg, 79%; gum;  $[\alpha]_D^{25} +5.76$  (  $c$  0.5,  $\text{CHCl}_3$ ); 81% ee ( Chiracel AD-H, 250 x 4.6 mm),  $n$ -hexane/ $i$ -PrOH, 90:10, 0.5 mL/min, 220 nm),  $t_r = 23.547$  min (major),  $t_r = 27.613$  min (minor); IR ( $\text{CHCl}_3$ ,  $\text{cm}^{-1}$ )  $\nu_{\text{max}}$  702, 744, 925, 1030, 1198, 1188, 1237, 1313, 1347, 1378, 1466, 1708, 1739, 2988, 2355;  $^1\text{H NMR}$  (200 MHz,  $\text{CDCl}_3$ ):  $\delta$  1.16- 1.35 (m, 9H), 2.16 (d,  $J = 6.3$  Hz, 2H), 2.54-2.61 (m, 1H), 2.63- 2.73 (dd,  $J = 7.1, 13.4$  Hz, 1H), 2.90-3.03 (m, 2H), 4.02-4.29 (m, 8H), 7.24-7.27 (m, 5H);  $^{13}\text{C NMR}$  (50 MHz,  $\text{CDCl}_3$ ):  $\delta$  14.13, 14.35, 37.12, 40.33, 41.35, 51.98, 60.60, 62.22, 65.61, 77.32, 126.60, 128.36, 129.35, 137.29, 156.64, 156.78, 170.87; HRMS (ESI) Calcd for  $\text{C}_{20}\text{H}_{29}\text{O}_6\text{N}_2$   $[\text{M} + \text{H}]^+$  393.2020; Found 393.2019.

Di-tert-butyl (3*R*,4*S*)-3-benzyl-4-(2-ethoxy-2-oxoethyl) pyrazolidine-1,2-dicarboxylate (  $\text{R}' = \text{tBu}$ , **4a**)

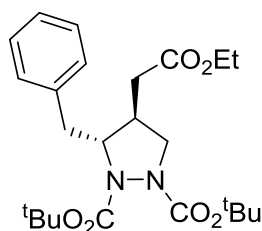

**Yield:** 785 mg, 70%; gum;  $[\alpha]_D^{25} +6.606$  (  $c$  1.18,  $\text{CHCl}_3$ ); 80% ee ( Chiracel AD-H 250 x 4.6 mm),  $n$ -hexane/ $i$ -PrOH, 90:10, 0.5 mL/min, 254 nm),  $t_r = 7.2$  min (minor),  $t_r = 30.6$  min (major); IR ( $\text{CHCl}_3$ ,  $\text{cm}^{-1}$ )  $\nu_{\text{max}}$  705, 745, 926, 1023, 1191, 1189, 1232, 1317, 1349, 1374, 1466, 1707, 1739, 2982, 2350;  $^1\text{H NMR}$  (200 MHz,  $\text{CDCl}_3$ ):  $\delta$  1.23 (t,  $J = 7.07$  Hz, 3H), 1.37-1.50 (m, 18H), 2.19 (d,  $J = 7.5$  Hz, 2H), 2.53-2.71 (m, 2H), 2.83-2.99 (m, 2H), 3.99-4.22 (m, 4H), 7.19-7.26 (m, 5H);  $^{13}\text{C NMR}$  (50 MHz,  $\text{CDCl}_3$ ):  $\delta$  14.11, 27.97, 28.14, 37.39, 40.19, 41.32, 51.40, 60.51, 65.35, 80.86, 126.39, 128.21, 129.37, 137.67, 155.26, 155.63, 171.00; HRMS (ESI) Calcd for  $\text{C}_{24}\text{H}_{36}\text{O}_6\text{N}_2$   $[\text{M} + \text{Na}]^+$  471.2466; Found 471.2465.

Diisopropyl (3*R*,4*S*)-4-(2-ethoxy-2-oxoethyl)-3-(4-methylbenzyl) pyrazolidine-1,2-dicarboxylate (**4b**)

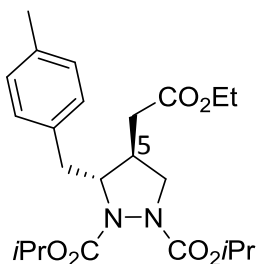

**Yield:** 771 mg, 71%; gum;  $[\alpha]_D^{25} +4.812$  (c 1.08, CHCl<sub>3</sub>); 84% ee ( Chiracel AD-H 250 x 4.6 mm), *n*-hexane/*i*-PrOH, 90:10, 0.5 mL/min, 220 nm),  $t_r = 16.253$  min (minor),  $t_r = 17.317$  min (major); IR (CHCl<sub>3</sub>, cm<sup>-1</sup>)  $\nu_{\max}$  760, 920, 1105, 1181, 1240, 1369, 1508, 1730, 2355; **<sup>1</sup>H NMR** (400 MHz, CDCl<sub>3</sub>):  $\delta$  1.15-1.30 (m, 15H), 2.16 (d,  $J = 7.5$  Hz, 2H), 2.31 (s, 3H), 2.57-2.66 (m, 2H), 2.92-2.96 (m, 2H), 4.05-4.11 (m, 3H), 4.21-4.24 (dd,  $J = 7.9, 10.9$  Hz, 1H), 4.88-4.95 (quint.  $J = 6.4$  Hz, 1H), 4.97-5.01 (quint.  $J = 6.4$  Hz, 1H), 7.07 (d,  $J = 7.8$  Hz, 2H), 7.12-7.14 (d,  $J = 8.2$  Hz, 2H); **<sup>13</sup>C NMR** (50 MHz, CDCl<sub>3</sub>):  $\delta$  14.18, 21.08, 21.84, 22.06, 37.39, 39.94, 41.33, 51.88, 60.60, 65.60, 69.83, 69.96, 129.09, 129.24, 134.34, 135.91, 156.29, 156.46, 170.96; HRMS (ESI) Calcd for C<sub>23</sub>H<sub>35</sub>O<sub>6</sub>N<sub>2</sub> [M + H]<sup>+</sup> 435.2490; Found 435.2490.

Diisopropyl (3*R*,4*S*)-4-(2-ethoxy-2-oxoethyl)-3-(4-methoxybenzyl) pyrazolidine-1,2-dicarboxylate (**4c**)

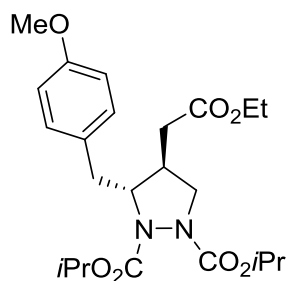

**Yield:** 754 mg, 67%; gum;  $[\alpha]_D^{25} +6.031$  (c 1.16, CHCl<sub>3</sub>); 87% ee ( Chiracel AD-H 250 x 4.6 mm), *n*-hexane/*i*-PrOH, 90:10, 0.5 mL/min, 220 nm),  $t_r = 26.780$  min (minor),  $t_r = 29.630$  min (major); IR (CHCl<sub>3</sub>, cm<sup>-1</sup>)  $\nu_{\max}$  760, 921, 1108, 1180, 1247, 1380, 1375, 1513, 1734, 2361; **<sup>1</sup>H NMR** (200 MHz, CDCl<sub>3</sub>):  $\delta$  1.20-1.31 (m, 15H), 2.16-2.20 (d,  $J = 6.2$  Hz, 2H), 2.54-2.64 (m, 2H), 2.84-2.99 (m, 2H), 3.78 (s, 3H), 4.01-4.17 (m, 4H), 4.86-5.01 (m, 2H), 6.78-6.82 (d,  $J = 8.7$  Hz, 2H), 7.15-7.19 (d,  $J = 8.7$  Hz, 2H); **<sup>13</sup>C NMR** (100 MHz, CDCl<sub>3</sub>):  $\delta$  14.20, 21.88, 37.35, 39.45, 41.31, 51.86, 55.07, 60.64, 65.73, 69.67,

69.85, 69.97, 113.80, 114.06, 129.55, 130.32, 156.43, 158.37, 171.03; HRMS (ESI) Calcd for C<sub>23</sub>H<sub>34</sub>O<sub>7</sub>N<sub>2</sub> [M + Na]<sup>+</sup>473.2258; Found 473.2254.

Diisopropyl (3*R*,4*S*)-4-(2-ethoxy-2-oxoethyl)-3-(4-(methylthio)benzyl) pyrazolidine-1,2-dicarboxylate  
(4d)

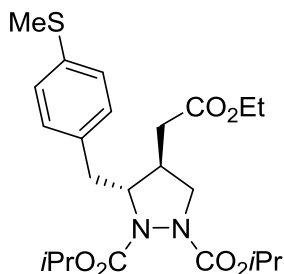

**Yield:** 875 mg, 75%; gum; [ $\alpha$ ]<sub>D</sub><sup>25</sup> +5.280 (c 1.06, CHCl<sub>3</sub>); 77% ee (Chiracel AS-H 250 x 4.6 mm), *n*-hexane/*i*-PrOH, 90:10, 0.5 mL/min, 220 nm), *t*<sub>r</sub> = 16.2 min (minor), *t*<sub>r</sub> = 18.6 min (major); IR (CHCl<sub>3</sub>, cm<sup>-1</sup>) *v*<sub>max</sub> 760, 922, 1040, 1147, 1192, 1258, 1319, 1341, 1359, 1477, 1711, 1738, 2980, 2359; <sup>1</sup>H NMR (200 MHz, CDCl<sub>3</sub>):  $\delta$  1.12- 1.31 (m, 15H), 2.22 (d, *J* = 7.4 Hz, 2H), 2.46 (s, 3H), 2.55-2.69 (m, 2H), 2.81-3.00 (m, 2H), 4.04-4.15 (q, *J* = 6.9 Hz, 2H), 4.17-4.27 (m, 2H), 4.85-5.07 (m, 2H), 7.18 (s, 4H); <sup>13</sup>C NMR (100 MHz, CDCl<sub>3</sub>):  $\delta$  14.16, 15.99, 21.77, 37.33, 39.73, 41.38, 51.76, 60.65, 65.53, 69.98, 126.82, 129.85, 134.47, 136.37, 156.31, 170.95; HRMS (ESI) Calcd for C<sub>23</sub>H<sub>34</sub>O<sub>6</sub>N<sub>2</sub>S [M + Na]<sup>+</sup>489.2030; Found 489.2027.

Diisopropyl (3*R*,4*S*)-3-((6-cyanobenzo[d][1,3]dioxol-5-yl)methyl)-4-(2-ethoxy-2-oxoethyl) pyrazolidine-1,2-dicarboxylate (4e)

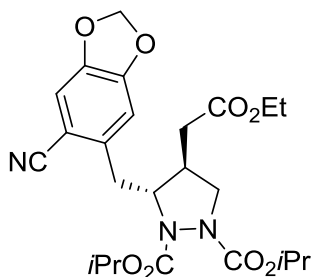

**Yield:** 795 mg, 65%; brownish gum; [ $\alpha$ ]<sub>D</sub><sup>25</sup> +42.775 (c 1.0, CHCl<sub>3</sub>); 81% ee (Chiracel AD-H 250 x 4.6 mm), *n*-hexane/*i*-PrOH, 80:20, 0.5 mL/min, 254 nm), *t*<sub>r</sub> = 27.337 min (minor), *t*<sub>r</sub> = 30.393 min (major); IR

(CHCl<sub>3</sub>, cm<sup>-1</sup>)  $\nu_{\max}$  760, 928, 1035, 1107, 1181, 1237, 1271, 13401, 1468, 1487, 1506, 1732, 2222, 2983; <sup>1</sup>H NMR (200 MHz, CDCl<sub>3</sub>):  $\delta$  1.06-1.34 (m, 15H), 2.29-3.17 (m, 6H), 4.08-4.30 (m, 4H), 4.75-5.09 (m, 2H), 6.03 (s, 2H), 6.98 (s, 1H), 7.05 (s, 1H); <sup>13</sup>C NMR (50 MHz, CDCl<sub>3</sub>):  $\delta$  14.16, 21.67, 21.80, 22.06, 36.91, 38.61, 42.13, 51.85, 60.85, 64.97, 69.99, 70.28, 102.12, 104.76, 110.93, 111.64, 117.93, 138.43, 146.58, 151.39, 156.06, 170.77; HRMS (ESI) Calcd for C<sub>24</sub>H<sub>31</sub>O<sub>8</sub>N<sub>3</sub> [M + Na]<sup>+</sup> 512.2003; Found 512.2004.

Diisopropyl (3*R*,4*S*)-4-(2-ethoxy-2-oxoethyl)-3-((6-nitrobenzo[d][1,3]dioxol-5-yl)methyl)pyrazolidine-1,2-dicarboxylate (**4f**)

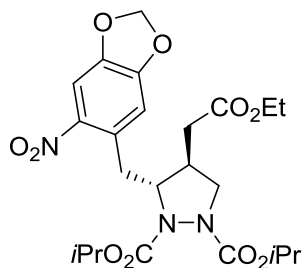

**Yield:** 879 mg, 69%; yellow gum;  $[\alpha]_{\text{D}}^{25}$  -4.640 (c 1.12, CHCl<sub>3</sub>); 92% ee (Chiracel AD-H 250 x 4.6 mm), *n*-hexane/*i*-PrOH, 80:20, 0.5 mL/min, 254 nm),  $t_r$  = 25.400 min (minor),  $t_r$  = 28.067 min (major); IR (CHCl<sub>3</sub>, cm<sup>-1</sup>)  $\nu_{\max}$  760, 817, 871, 926, 1034, 1106, 1179, 1259, 1327, 1382, 1485, 1521, 1704, 1731, 2981; <sup>1</sup>H NMR (200 MHz, CDCl<sub>3</sub>):  $\delta$  1.07-1.38 (m, 15H), 2.39-2.76 (m, 5H), 2.90-2.99 (dd,  $J$  = 7.8, 11.6 Hz, 1H), 3.42-3.50 (dd,  $J$  = 2.4, 13.1 Hz, 1H), 4.17 (q,  $J$  = 7.2 Hz, 3H), 4.29-4.38 (dd,  $J$  = 7.5, 11.6 Hz, 1H), 4.73 (sep,  $J$  = 6.0 Hz, 1H), 5.00 (sep,  $J$  = 6.3 Hz, 1H), 6.08 (s, 2H), 7.04 (s, 1H), 7.65 (s, 1H); <sup>13</sup>C NMR (50 MHz, CDCl<sub>3</sub>):  $\delta$  14.14, 21.53, 21.67, 21.93, 22.04, 30.76, 36.65, 39.18, 43.05, 52.05, 60.78, 64.82, 69.70, 70.27, 102.71, 105.35, 112.57, 131.19, 142.68, 146.79, 151.53, 156.18, 170.93; HRMS (ESI) Calcd for C<sub>23</sub>H<sub>31</sub>O<sub>10</sub>N<sub>3</sub> [M + Na]<sup>+</sup> 532.2333; Found 532.2331.



Di-tert-butyl (3*R*,4*S*)-4-(2-ethoxy-2-oxoethyl)-3-((6-nitrobenzo[d][1,3]dioxol-5-yl)methyl) pyrazolidine-1,2-dicarboxylate (**4g**)

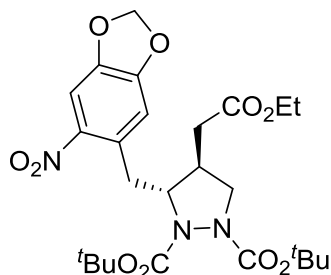

**Yield:** 887 mg, 66%; yellow solid; mp: 130 – 132 °C;  $[\alpha]_D^{25}$  -3.796 (c 1.0, CHCl<sub>3</sub>); 90% ee ( Chiracel AD-H 250 x 4.6 mm), *n*-hexane/*i*-PrOH, 90:10, 0.5 mL/min, 254 nm),  $t_r$  = 29.292 min (minor),  $t_r$  = 34.651 min (major); IR (CHCl<sub>3</sub>, cm<sup>-1</sup>)  $\nu_{\max}$ ; 769, 876, 936, 1054, 1140, 1194, 1269, 1337, 1386, 1490, 1531, 1714, 1741, 2990; **<sup>1</sup>H NMR** (200 MHz, CDCl<sub>3</sub>):  $\delta$  1.25-1.32 (m, 12H), 2.38-.70 (m, 4H), 2.90-2.99 (m, 1H), 3.35-3.43 (dd,  $J$  = 2.5, 13.1 Hz, 1H), 4.13-4.31 (m, 4H), 6.08 (s, 2H), 7.10 (s, 1H), 7.54 (s, 1H); **<sup>13</sup>C NMR** (50 MHz, CDCl<sub>3</sub>):  $\delta$  14.28, 27.95, 28.38, 37.05, 39.06, 43.04, 60.87, 80.98, 81.55, 102.69, 105.48, 112.86, 131.41, 142.84, 146.74, 151.45, 155.52, 171.10; HRMS (ESI) Calcd for C<sub>25</sub>H<sub>35</sub>O<sub>10</sub>N<sub>3</sub> [M + Na]<sup>+</sup> 560.2215; Found 560.2214.

Diisopropyl (3*R*,4*S*)-4-(2-ethoxy-2-oxoethyl)-3-(naphthalen-2-ylmethyl) pyrazolidine-1,2-dicarboxylate (**4h**)

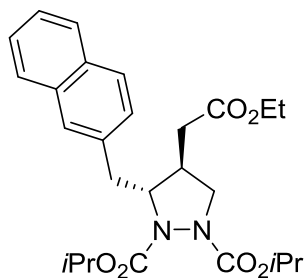

**Yield:** 800 mg, 68%; gum;  $[\alpha]_D^{25}$  -5.247 (c 0.8, CHCl<sub>3</sub>); 83% ee (Chiracel OD-H 250 x 4.6 mm), *n*-hexane/*i*-PrOH, 90:10, 0.5 mL/min, 254 nm),  $t_r$  = 16.741 min (minor),  $t_r$  = 18.284 min (major); IR (CHCl<sub>3</sub>, cm<sup>-1</sup>)  $\nu_{\max}$  760, 923, 1110, 1240, 1375, 1510, 1733, 2359; <sup>1</sup>H NMR (200 MHz, CDCl<sub>3</sub>):  $\delta$  1.13 (t,  $J$  = 7.1 Hz, 3H), 1.22-1.35 (m, 12H), 2.62-2.68 (m, 1H), 2.88-3.06 (m, 2H), 3.61 (br s, 1H), 3.91-4.01 (q,  $J$  = 7.2 Hz, 2H), 4.24-4.39 (m, 2H), 4.85-5.10 (m, 2H), 7.36- 8.24 (m, 8H); <sup>13</sup>C NMR (50 MHz, CDCl<sub>3</sub>):  $\delta$  13.85, 21.49, 21.61, 21.85, 36.72, 38.34, 41.83, 52.05, 60.27, 63.82, 69.50, 69.91, 123.55, 125.39, 125.94, 127.39, 127.50, 128.59, 131.79, 133.29, 133.67, 155.61, 156.49, 170.60; HRMS (ESI) Calcd for C<sub>26</sub>H<sub>34</sub>O<sub>6</sub>N<sub>2</sub> [M + Na]<sup>+</sup>493.2309; Found 493.2305.

Diisopropyl (3*R*,4*S*)-3-(2-bromo-3,4,5-trimethoxybenzyl)-4-(2-ethoxy-2-oxoethyl) pyrazolidine-1,2-dicarboxylate (**4i**)

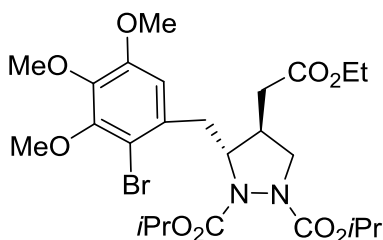

**Yield:** 1.061 g, 72%; gum;  $[\alpha]_D^{25}$  +26.867 (c 1.54, CHCl<sub>3</sub>); 94% ee (Chiracel AD-H 250 x 4.6 mm), *n*-hexane/*i*-PrOH, 95:5, 0.5 mL/min, 220 nm),  $t_r$  = 40.837 min (major),  $t_r$  = 66.290 min (minor); IR (CHCl<sub>3</sub>, cm<sup>-1</sup>)  $\nu_{\max}$  760, 922, 1109, 1182, 1249, 1377, 1389, 1515, 1737, 2365; <sup>1</sup>H NMR (200 MHz, CDCl<sub>3</sub>):  $\delta$  1.02-1.31 (m, 15H), 2.22-2.46 (m, 2H), 2.58-2.81 (m, 2H), 2.94-3.04 (m, 2H), 3.86 (s, 6H), 3.88 (s, 3H), 4.07-4.32 (m, 4H), 4.81 (quint,  $J$  = 6.2 Hz, 1H), 5.00 (quint,  $J$  = 6 Hz, 1H), 6.85 (s, 1H); <sup>13</sup>C NMR (50 MHz, CDCl<sub>3</sub>):  $\delta$  14.06, 21.53, 21.72, 21.91, 21.97, 37.00, 40.37, 41.89, 52.05, 56.17, 60.63, 60.70, 60.81, 63.61, 69.61, 69.88, 110.50, 110.95, 132.57, 141.75, 150.46, 152.35, 155.89, 159.21, 170.82; LC-MS (ESI)  $m/z$ : 591.2 [M + 1]<sup>+</sup>

Diisopropyl (3*R*,4*S*)-3-(3-(benzyloxy)propyl)-4-(2-ethoxy-2-oxoethyl) pyrazolidine-1,2-dicarboxylate (**4j**)

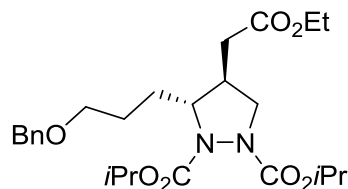

**Yield:** 837 mg, 70%; gum;  $[\alpha]_D^{25} +4.597$  (c 1.0, CHCl<sub>3</sub>); 92% ee (Chiracel AD-H 250 x 4.6 mm), *n*-hexane/*i*-PrOH, 90:10, 0.5 mL/min, 220 nm),  $t_r = 25.810$  min (major),  $t_r = 30.130$  min (minor); IR (CHCl<sub>3</sub>, cm<sup>-1</sup>)  $\nu_{\max}$  760, 920, 1113, 1179, 1246, 1374, 1386, 1512, 1738, 2363; <sup>1</sup>H NMR (200 MHz, CDCl<sub>3</sub>):  $\delta$  1.20-1.29 (m, 15H), 1.62-1.77 (m, 4H), 2.27-2.52 (m, 3H), 2.90-2.98 (dd,  $J = 5.4, 11.5$  Hz, 1H), 3.93-3.99 (m, 1H), 4.07-4.48 (m, 3H), 4.48 (s, 2H), 4.87- 5.02 (m, 2H), 7.30 (s, 5H); <sup>13</sup>C NMR (50 MHz, CDCl<sub>3</sub>):  $\delta$  14.01, 21.80, 26.27, 30.34, 37.54, 41.48, 51.36, 60.46, 63.90, 69.55, 69.65, 72.61, 77.20, 127.25, 128.08, 138.37, 156.45, 156.65, 170.91; HRMS (ESI) Calcd for C<sub>25</sub>H<sub>38</sub>O<sub>7</sub>N<sub>2</sub> [M + Na]<sup>+</sup> 501.257; Found 501.2568.

Diisopropyl (3*R*,4*S*)-4-(2-ethoxy-2-oxoethyl)-3-propylpyrazolidine-1,2-dicarboxylate (**4k**)

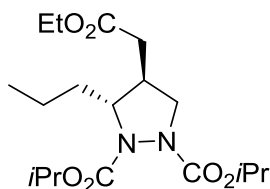

**Yield:** 735 mg, 79%; gum;  $[\alpha]_D^{25} -1.143$  (c 1.0, CHCl<sub>3</sub>); IR (CHCl<sub>3</sub>, cm<sup>-1</sup>)  $\nu_{\max}$  1238, 1512, 1611, 1735; <sup>1</sup>H NMR (200 MHz, CDCl<sub>3</sub>):  $\delta$  0.945 (t,  $J = 5.6$  Hz, 3H), 1.22-1.30 (m, 15H), 1.35-1.46 (m, 4H), 2.28-2.55 (m, 3H), 2.89-2.98 (dd,  $J = 5.3, 11.5$  Hz, 1H), 3.94 (br s, 1H), 4.09-4.22 (m, 3H), 4.90-5.02 (m, 2H); <sup>13</sup>C NMR (50 MHz, CDCl<sub>3</sub>):  $\delta$  13.65, 14.18, 19.31, 21.95, 35.96, 37.82, 41.58, 51.52, 60.59, 63.98, 69.58, 77.35, 156.69, 171.12; HRMS (ESI) Calcd for C<sub>18</sub>H<sub>33</sub>O<sub>6</sub>N<sub>2</sub> [M + H]<sup>+</sup> 373.2333; Found 373.2333.

Diisopropyl (3*R*,4*S*)-4-(2-ethoxy-2-oxoethyl)-3-methylpyrazolidine-1,2-dicarboxylate (**4i**)

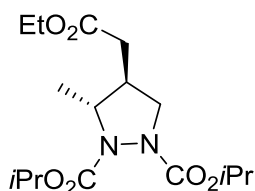

**Yield:** 688 mg, 80%; gum;  $[\alpha]_D^{25}$  -1.817 (c 1.1, CHCl<sub>3</sub>);  $\nu_{\max}$  1236, 1518, 1617, 1736; **<sup>1</sup>H NMR** (200 MHz, CDCl<sub>3</sub>):  $\delta$  1.24-1.31 (m, 18H), 2.29-2.47 (m, 3H), 2.86-2.93 (m, 1H), 3.88- 3.96 (m, 1H), 4.14 (q,  $J$  = 7.2 Hz, 2H), 4.96 (sep,  $J$  = 6.2 Hz, 2H); **<sup>13</sup>C NMR** (50 MHz, CDCl<sub>3</sub>):  $\delta$  14.05, 19.64, 21.82, 21.90, 36.67, 43.25, 51.81, 59.94, 60.53, 69.52, 69.71, 77.20, 155.97, 156.82, 170.94; HRMS (ESI) Calcd for C<sub>19</sub>H<sub>29</sub>O<sub>6</sub>N<sub>2</sub> [M + H]<sup>+</sup> 345.2020; Found 345.2019.

1,2-di-*tert*-butyl 3-ethyl (3*S*,4*R*,5*R*)-5-benzyl-4-(2-ethoxy-2-oxoethyl)pyrazolidine-1,2,3-tricarboxylate (**5a**, R' = *t*-Bu)

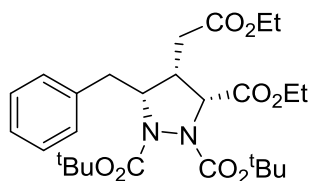

**Yield:** 650 mg, 50%; gum;  $[\alpha]_D^{25}$  +36.7 (c 1.2, CHCl<sub>3</sub>); 86% ee (Chiracel OD-H (250 × 4.6 mm), *n*-Hexane:*i*-PrOH, 90:10, 0.5 mL/min, 254 nm),  $t_r$  = 29.1 min (minor),  $t_r$  = 39.7 min (major); IR (CHCl<sub>3</sub>, cm<sup>-1</sup>):  $\nu_{\max}$  741, 1061, 1621, 1738; **<sup>1</sup>H NMR** (500 MHz, CDCl<sub>3</sub>)  $\delta$ : 1.19-1.37 (m, 15H), 1.46 - 1.51 (m, 9H), 2.46 (dd,  $J$  = 17.1, 8.9 Hz, 1H), 2.52 - 2.57 (m, 1H), 3.11 - 3.17 (m, 2H), 4.07 - 4.28 (m, 5H), 4.42 (br s, 1H), 4.52 (d,  $J$  = 10.1 Hz, 1H), 7.19 (d,  $J$  = 6.7 Hz, 1H), 7.22 - 7.27 (m, 3 H), 7.27 - 7.30 (m, 1H); **<sup>13</sup>C NMR** of (126 MHz, CDCl<sub>3</sub>)  $\delta$ : 14.1, 14.2, 27.8, 28.3, 30.9, 33.7, 41.7, 60.9, 61.4, 62.6, 63.1, 80.9, 81.2, 126.0, 127.8, 128.1, 129.8, 138.8, 153.1, 155.3, 168.7, 170.4; HRMS (ESI) Calcd for C<sub>27</sub>H<sub>40</sub>N<sub>2</sub>O<sub>8</sub> [M+Na]<sup>+</sup> 543.2677; Found 543.2670.

Triethyl (3*S*,4*R*,5*R*)-5-benzyl-4-(2-ethoxy-2-oxoethyl)pyrazolidine-1,2,3-tricarboxylate (**5a**, R' = Et)

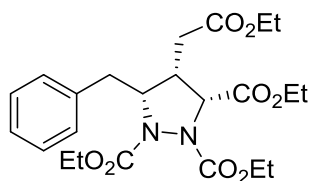

Yield: 836 mg, 72%; gum;  $[\alpha]_{25}^D +26.7$  (c 1.34, CHCl<sub>3</sub>); 96% ee (Chiracel OD-H (250 × 4.6 mm), *n*-Hexane:*i*-PrOH, 90:10, 0.5 mL/min, 254 nm),  $t_r = 10.2$  min (minor),  $t_r = 11.1$  min (major); IR (CHCl<sub>3</sub>, cm<sup>-1</sup>):  $\nu_{\max}$  740, 1065, 1620, 1735; <sup>1</sup>H NMR (500 MHz, CDCl<sub>3</sub>)  $\delta$ : 1.09 (br s, 3H), 1.29 (t,  $J = 7.0$  Hz, 6H), 1.33 (t,  $J = 7.0$  Hz, 3H), 2.42-2.51 (m, 2H), 2.58 -2.64 (1H), 3.16 (br s, 2H), 4.02 (d,  $J = 6.4$  Hz, 2H), 4.16-4.29 (m, 6H), 4.56 (br s, 2H), 7.17 (d,  $J = 4.5$  Hz, 1H), 7.25 (br s, 4H); <sup>13</sup>C NMR of (126 MHz, CDCl<sub>3</sub>)  $\delta$ : 14.0, 14.1, 14.3, 14.5, 30.9, 33.5, 41.8, 60.8, 60.9, 61.5, 62.0, 62.5, 63.4, 126.1, 128.0, 129.5, 138.2, 154.1, 157.3, 168.5, 170.2; HRMS (ESI) Calcd for C<sub>23</sub>H<sub>32</sub>N<sub>2</sub>O<sub>8</sub> [M+Na]<sup>+</sup> 487.2051; Found 487.2045.

triethyl (3*S*,4*R*,5*R*)-4-(2-ethoxy-2-oxoethyl)-5-(4-methoxybenzyl)pyrazolidine-1,2,3-tricarboxylate (**5b**)

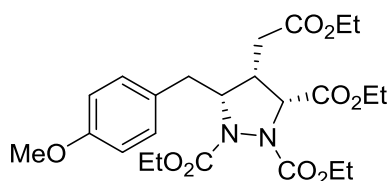

Yield: 952 mg, 77%; gum;  $[\alpha]_{25}^D +22.8$  (c 1.2, CHCl<sub>3</sub>); 96% ee (Chiracel OD-H (250 × 4.6 mm), *n*-Hexane:*i*-PrOH, 90:10, 0.5 mL/min, 254 nm),  $t_r = 15.1$  min (minor),  $t_r = 12.5$  min (major); IR (CHCl<sub>3</sub>, cm<sup>-1</sup>):  $\nu_{\max}$  739, 1068, 1622, 1738; <sup>1</sup>H NMR (500 MHz, CDCl<sub>3</sub>)  $\delta$ : 1.12 (br s, 3H), 1.29 (t,  $J = 7.0$  Hz, 6H), 1.33 (t,  $J = 7.0$  Hz, 3H), 2.41-2.62 (m, 3H), 3.07-3.15 (m, 2H), 3.77 (s, 3H), 4.04 (br s, 2H), 4.14-4.28 (m, 6H), 4.48 (s, 1H), 4.53 (d,  $J = 8.5$  Hz, 1H), 6.78 (d,  $J = 7.9$  Hz, 2H), 7.15 (d,  $J = 6.1$  Hz, 2H); <sup>13</sup>C

NMR of (126 MHz, CDCl<sub>3</sub>)  $\delta$ : 14.1, 14.1, 14.6, 30.9, 32.6, 41.8, 55.0, 60.8, 61.0, 61.5, 62.1, 62.6, 63.6, 77.0, 96.1, 113.5, 130.4, 154.0, 157.5, 158.1, 168.5, 170.3; HRMS (ESI) Calcd for C<sub>24</sub>H<sub>34</sub>N<sub>2</sub>O<sub>9</sub> [M+Na]<sup>+</sup> 517.2157; Found 517.2151.

triethyl (3*S*,4*R*,5*R*)-4-(2-ethoxy-2-oxoethyl)-5-(4-fluorobenzyl)pyrazolidine-1,2,3-tricarboxylate (**5c**)

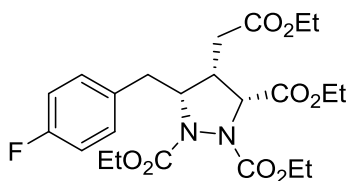

Yield: 772 mg, 64%; gum;  $[\alpha]_{25}^D$  +31.9 (c 0.5, CHCl<sub>3</sub>); 95% ee (Chiracel OD-H (250 × 4.6 mm), *n*-Hexane:*i*-PrOH, 90:10, 0.5 mL/min, 254 nm),  $t_r$  = 93.6 min (minor),  $t_r$  = 86.0 min (major); IR (CHCl<sub>3</sub>, cm<sup>-1</sup>):  $\nu_{\max}$  740, 1066, 1621, 1740; <sup>1</sup>H NMR (400 MHz, CDCl<sub>3</sub>)  $\delta$ : 1.12 (br s, 3H), 1.29 (t,  $J$  = 7.0 Hz, 6H), 1.33 (t,  $J$  = 7.0 Hz, 3H), 2.41-2.62 (m, 3H), 3.07-3.15 (m, 2H), 3.77 (s, 3H), 4.04 (br s, 2H), 4.14-4.28 (m, 6H), 4.48 (s, 1H), 4.53 (d,  $J$  = 8.5 Hz, 1H), 6.78 (d,  $J$  = 7.9 Hz, 2H), 7.15 (d,  $J$  = 6.1 Hz, 2H); <sup>13</sup>C NMR of (101 MHz, CDCl<sub>3</sub>)  $\delta$ : 14.0, 14.2, 14.5, 33.6, 39.3, 44.2, 60.9, 61.3, 62.0, 62.3, 62.8, 64.4, 115.2, 115.4 (d,  $J$  = 20.8 Hz), 131.0 (d,  $J$  = 7.7 Hz), 132.5, 156.0, 160.7 (d,  $J$  = 245.0 Hz), 168.4, 170.5; HRMS (ESI) Calcd for C<sub>23</sub>H<sub>31</sub>FN<sub>2</sub>O<sub>8</sub> [M+Na]<sup>+</sup> 505.1957; Found 505.1955.

triethyl (3*S*,4*R*,5*R*)-5-(3,4-dimethylbenzyl)-4-(2-ethoxy-2-oxoethyl)pyrazolidine-1,2,3-tricarboxylate (**5d**)

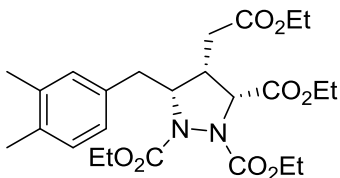

Yield: 924 mg, 75%; gum;  $[\alpha]_{25}^D +12.3$  (c 1.2,  $\text{CHCl}_3$ ); 94% ee (Chiracel OD-H (250 × 4.6 mm), *n*-Hexane:*i*-PrOH, 90:10, 0.5 mL/min, 254 nm),  $t_r = 19.8$  min (minor),  $t_r = 14.3$  min (major); IR ( $\text{CHCl}_3$ ,  $\text{cm}^{-1}$ ):  $\nu_{\text{max}}$  741, 1061, 1624, 1739;  $^1\text{H}$  NMR (500 MHz,  $\text{CDCl}_3$ )  $\delta$ : 1.21 -1.28 (m, 9H), 1.31 (t,  $J = 7.0$  Hz, 3H), 1.85-1.95 (m, 1H), 2.09 (br s, 1H), 2.22 (s, 1H), 2.68 (dd,  $J = 12.8, 8.2$  Hz, 1H), 2.77 -2.82 (m, 1H), 3.10 (s, 1H), 4.02 (d,  $J = 4.5$  Hz, 1H), 4.07-4.27 (m, 8H), 4.96 (d,  $J = 7.6$  Hz, 1H), 6.94 (d,  $J = 7.3$  Hz, 1H), 7.00 (s, 1H), 7.02 (s, 1H);  $^{13}\text{C}$  NMR of (126 MHz,  $\text{CDCl}_3$ )  $\delta$ : 13.9, 14.0, 14.4, 19.3, 19.6, 33.6, 39.9, 44.4, 60.6, 61.1, 62.0, 62.1, 62.7, 64.2, 126.7, 129.7, 134.0, 134.7, 136.4, 156.1, 168.4, 170.45 ; HRMS (ESI) Calcd for  $\text{C}_{25}\text{H}_{36}\text{N}_2\text{O}_8$   $[\text{M}+\text{Na}]^+$  515.2364; Found 515.2360.

triethyl (3*S*,4*R*,5*R*)-5-(4,5-dimethoxy-2-nitrobenzyl)-4-(2-ethoxy-2-oxoethyl)pyrazolidine-1,2,3-tricarboxylate (**5e**)

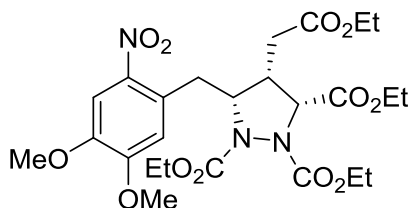

Yield: 911 mg, 64%; yellow gum;  $[\alpha]_{25}^D -1.19$  (c 0.1,  $\text{CHCl}_3$ ); 88% ee (Chiracel OD-H (250 × 4.6 mm), *n*-Hexane:*i*-PrOH, 90:10, 0.5 mL/min, 254 nm),  $t_r = 34.0$  min (minor),  $t_r = 30.4$  min (major); IR ( $\text{CHCl}_3$ ,  $\text{cm}^{-1}$ ):  $\nu_{\text{max}}$  740, 1064, 1197, 1273, 466, 1522, 1618, 1736, 2345;  $^1\text{H}$  NMR (500 MHz,  $\text{CDCl}_3$ )  $\delta$ : 0.99 (br s, 2 H), 1.09 (t,  $J = 6.7$  Hz, 1H), 1.25 (d,  $J = 7.0$  Hz, 3H), 1.31 - 1.36 (m, 6H), 2.43 - 2.52 (m, 1H), 2.71 (dd,  $J = 17.2, 6.3$  Hz, 1H), 3.0 (t,  $J = 12.5$  Hz, 1H), 3.26 (d,  $J = 13.1$  Hz, 1H), 3.33 - 3.40 (m, 1H), 3.93 (s, 3H), 3.93-4.03 (m, 2H), 4.03 (m, 3H), 4.14 - 4.32 (m, 6H), 4.60 - 4.64 (m, 1H), 4.67 (d,  $J = 10.0$  Hz, 1H), 7.12 (s, 1H), 7.60 (s, 1H);  $^{13}\text{C}$  NMR of (126 MHz,  $\text{CDCl}_3$ )  $\delta$ : 14.1, 14.2, 14.4, 31.2, 31.7, 42.4, 56.2, 56.8, 61.2, 61.3, 61.7, 61.8, 62.0, 62.6, 107.5, 116.8, 129.1, 140.5, 147.5, 153.1, 153.5, 156.1, 170.0, 170.1; HRMS (ESI) Calcd for  $\text{C}_{25}\text{H}_{35}\text{N}_3\text{O}_{12}$   $[\text{M}+\text{Na}]^+$  592.2113; Found 592.2106.

triethyl (3*S*,4*R*,5*R*)-4-(2-ethoxy-2-oxoethyl)-5-(naphthalen-2-ylmethyl)pyrazolidine-1,2,3-tricarboxylate (**5f**)

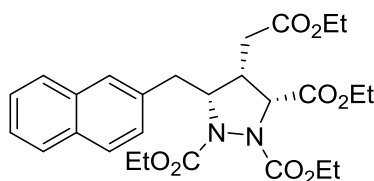

Yield: 1016 mg, 79%; gum;  $[\alpha]_{25}^D +60.3$  (c 1.6, CHCl<sub>3</sub>); 94% ee (Chiracel OD-H (250 × 4.6 mm), *n*-Hexane:*i*-PrOH, 90:10, 0.5 mL/min, 254 nm),  $t_r = 29.1$  min (minor),  $t_r = 24.0$  min (major); IR (CHCl<sub>3</sub>, cm<sup>-1</sup>):  $\nu_{\max}$  738, 1061, 1622, 1740; <sup>1</sup>H NMR (500 MHz, CDCl<sub>3</sub>)  $\delta$ : 1.15 (t,  $J = 7.0$  Hz, 3H), 1.19 (t,  $J = 7.0$  Hz, 3H), 1.28- 1.34 (m, 6H), 1.77 (br s, 1H), 2.87-2.93 (m, 2H), 3.99 (d,  $J = 5.6$  Hz, 3H), 4.05-4.12 (m, 3H), 4.23-4.36 (m, 6H), 5.05 (d,  $J = 7.9$  Hz, 1H), 7.35 (d,  $J = 6.7$  Hz, 2H), 7.48 (t,  $J = 7.0$  Hz, 1H), 7.57 (s, 1H), 7.74 (dd,  $J = 7.0, 2.1$  Hz, 1H), 7.82 (d,  $J = 7.9$  Hz, 1H), 8.33 (s, 1H); <sup>13</sup>C NMR of (126 MHz, CDCl<sub>3</sub>)  $\delta$ : 13.9, 14.0, 14.4, 33.4, 39.0, 45.3, 60.5, 61.1, 62.2, 62.9, 64.2, 124.1, 125.3, 125.8, 126.4, 127.3, 127.8, 128.6, 131.9, 133.1, 133.7, 156.3, 157.6, 168.2, 170.2; HRMS (ESI) Calcd for C<sub>27</sub>H<sub>34</sub>N<sub>2</sub>O<sub>8</sub> [M+Na]<sup>+</sup> 537.2207; Found 537.2205.

triethyl (3*S*,4*R*,5*R*)-4-(2-ethoxy-2-oxoethyl)-5-pentylpyrazolidine-1,2,3-tricarboxylate (**5g**)

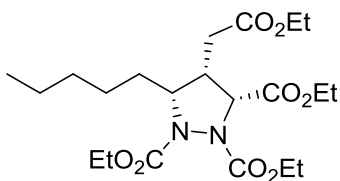

Yield: 800 mg, 72%;  $[\alpha]_{25}^D +1.5$  (c 2.0, CHCl<sub>3</sub>); IR (CHCl<sub>3</sub>, cm<sup>-1</sup>):  $\nu_{\max}$  1620, 1624, 1732, 1736; <sup>1</sup>H NMR (400 MHz, CDCl<sub>3</sub>)  $\delta$ : 0.88 (t,  $J = 6.7$  Hz, 3H); 1.25-1.31 (m, 17H), 1.39-1.45 (m, 2H), 1.58-1.65 (m, 1H), 2.33 (dd,  $J = 8.7, 17.0$  Hz, 1H), 2.42 (dd,  $J = 6.7, 16.8$  Hz, 1H), 2.78 (q,  $J = 6.7, 14.8$  Hz, 1H), 3.94 (q,  $J = 5.7$  Hz, 1H), 4.13-4.27 (m, 8 Hz), 4.94 (d,  $J = 8.0$  Hz, 1H); <sup>13</sup>C NMR of (101 MHz, CDCl<sub>3</sub>)  $\delta$ : 14.1,



14.2, 14.5, 14.5, 22.5, 25.2, 31.6, 33.7, 33.9, 44.4, 60.9, 61.2, 62.2, 62.2, 62.7, 63.7, 156.4, 158.0, 168.6, 170.8; HRMS (ESI) Calcd for C<sub>21</sub>H<sub>36</sub>N<sub>2</sub>O<sub>8</sub> [M+Na]<sup>+</sup> 467.2364; Found 467.2367.

triethyl (3*S*,4*R*,5*R*)-4-(2-ethoxy-2-oxoethyl)-5-methylpyrazolidine-1,2,3-tricarboxylate (**5h**)

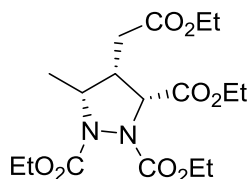

Yield: 602 mg, 62%; gum; [ $\alpha$ ]<sub>25</sub><sup>D</sup> -11.6 (c 1.7, CHCl<sub>3</sub>); IR (CHCl<sub>3</sub>, cm<sup>-1</sup>):  $\nu_{\max}$  1197, 1618, 1736, 1738; <sup>1</sup>H NMR (200 MHz, CDCl<sub>3</sub>)  $\delta$ : 1.24 - 1.33 (m, 15 H), 2.34 - 2.52 (m, 2 H), 2.99 - 3.15 (m, 1 H), 4.04 - 4.61 (m, 10 H); <sup>13</sup>C NMR of (50 MHz, CDCl<sub>3</sub>)  $\delta$ : 13.7, 13.9, 14.0, 14.33, 14.39, 30.9, 41.4, 43.9, 46.4, 56.4, 60.8, 61.3, 61.9, 62.7, 64.0, 96.0, 153.7, 156.8, 170.2, 170.5; HRMS (ESI) Calcd for C<sub>17</sub>H<sub>28</sub>N<sub>2</sub>O<sub>8</sub> [M+Na]<sup>+</sup> 411.1738; Found 411.1732.

Diisopropyl (*R,E*)-1-(5-ethoxy-5-oxo-1-phenylpent-3-en-2-yl)hydrazine-1,2-dicarboxylate (**6**)

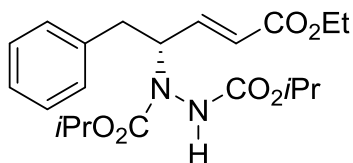

Yield: 912.6 mg, 90%; gum; <sup>1</sup>H NMR (200 MHz, CDCl<sub>3</sub>)  $\delta$ : 1.16-1.31 (m, 15H), 2.92-3.10 (m, 2H), 4.17 (q, *J* = 7.07 Hz, 2H), 4.81-5.02 (m, 2H), 5.88 (d, *J* = 16.29 Hz, 1H), 6.12 (br s, 1H), 6.89-7.00 (dd, *J* = 2.7, 18.3 Hz, 1H), 7.17-7.32 (m, 5H); <sup>13</sup>C NMR (126 MHz, CDCl<sub>3</sub>)  $\delta$ : 14.2, 21.88, 21.94, 37.73, 60.31, 69.88, 70.32, 122.84, 126.71, 128.60, 128.97, 137.06, 144.55, 154.90, 165.86.

(3*S*,4*R*)-4-((ethoxycarbonyl)amino)-3-(((ethoxycarbonyl)amino)methyl)-5-phenylpentanoic acid (**7**)

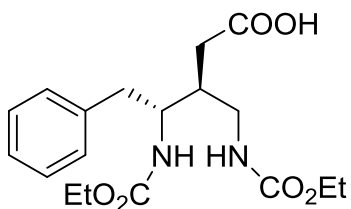

**Yield:** 56 mg, 60%; gum;  $[\alpha]_D^{25}$  -1.490 (c 1.12, CHCl<sub>3</sub>); **<sup>1</sup>H NMR** (400 MHz, DMSO-D<sub>6</sub>): δ 1.07 (t, *J* = 7.3 Hz, 3H), 1.20 (t, *J* = 7.3 Hz, 3H), 2.14-2.30 (m, 2H), 2.42-2.47 (m, 1H), 2.75 (t, *J* = 5.5 Hz, 2H), 2.89-2.94 (dd, *J* = 7.3, 10.9 Hz, 2H), 3.96-4.12 (m, 7H), 7.18-7.30 (m, 5H), 8.31 (s, 1H), 12.31 (s, 1H); **<sup>13</sup>C NMR** (50 MHz, DMSO-D<sub>6</sub>): δ 14.19, 14.40, 36.04, 41.02, 51.44, 61.59, 61.75, 65.32, 126.30, 128.10, 129.38, 137.83, 156.37, 172.83; LC-MS (ESI) *m/z*: 365.2 [M - 1]<sup>+</sup>

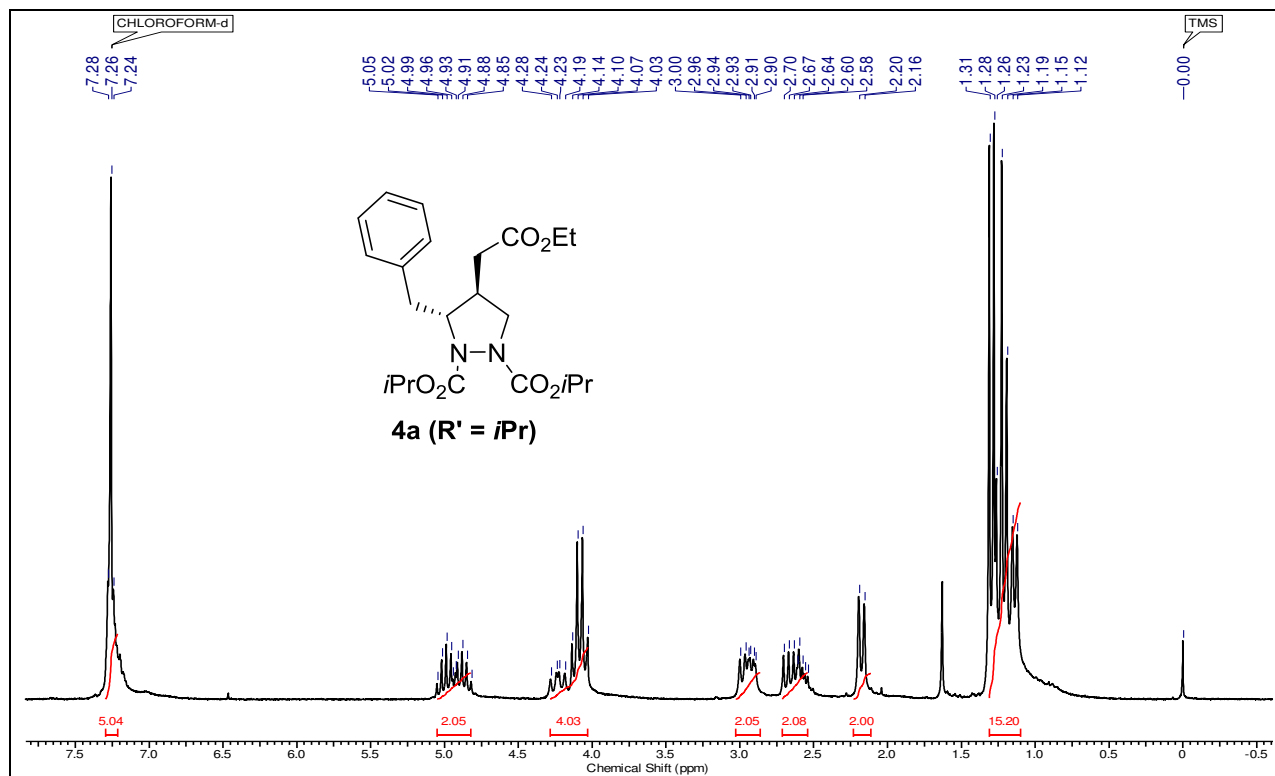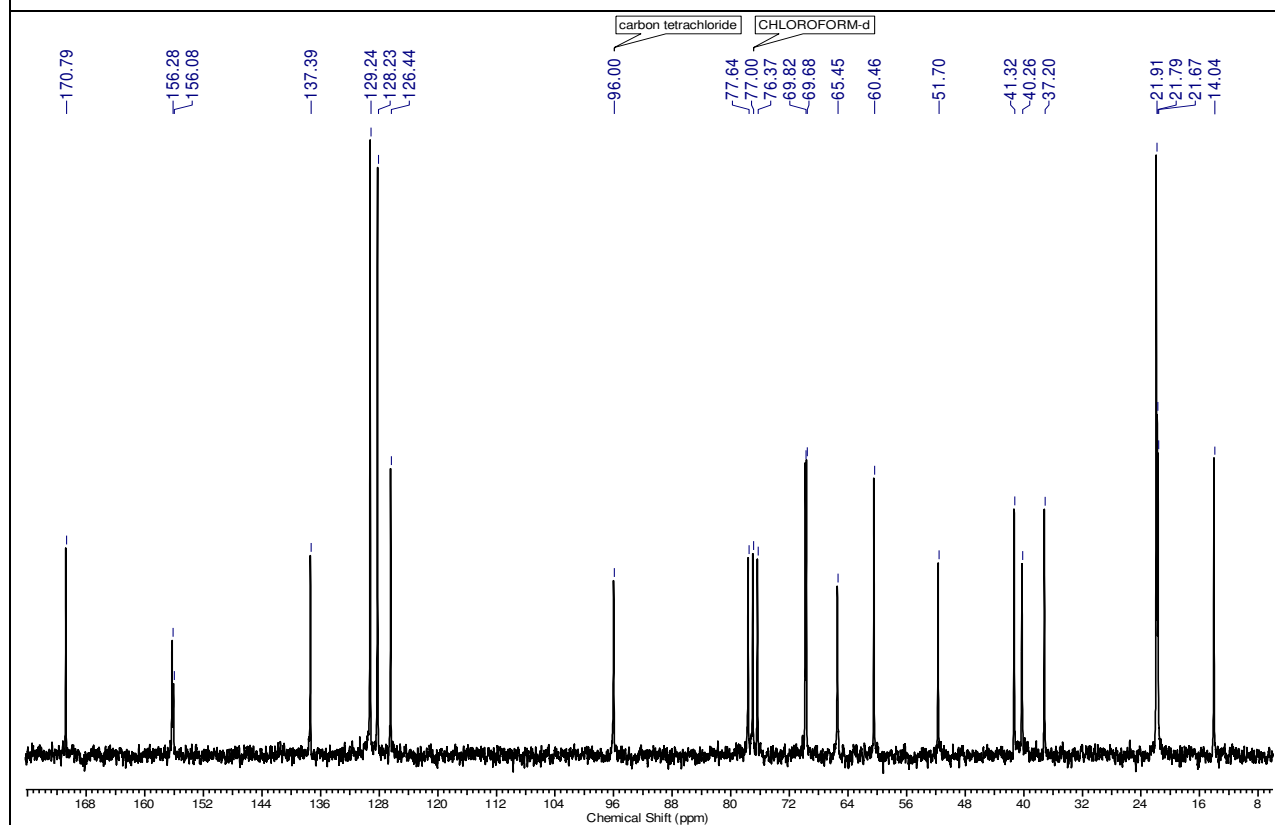

$^1\text{H}$  &  $^{13}\text{C}$  spectra of **4a (R' = iPr)**

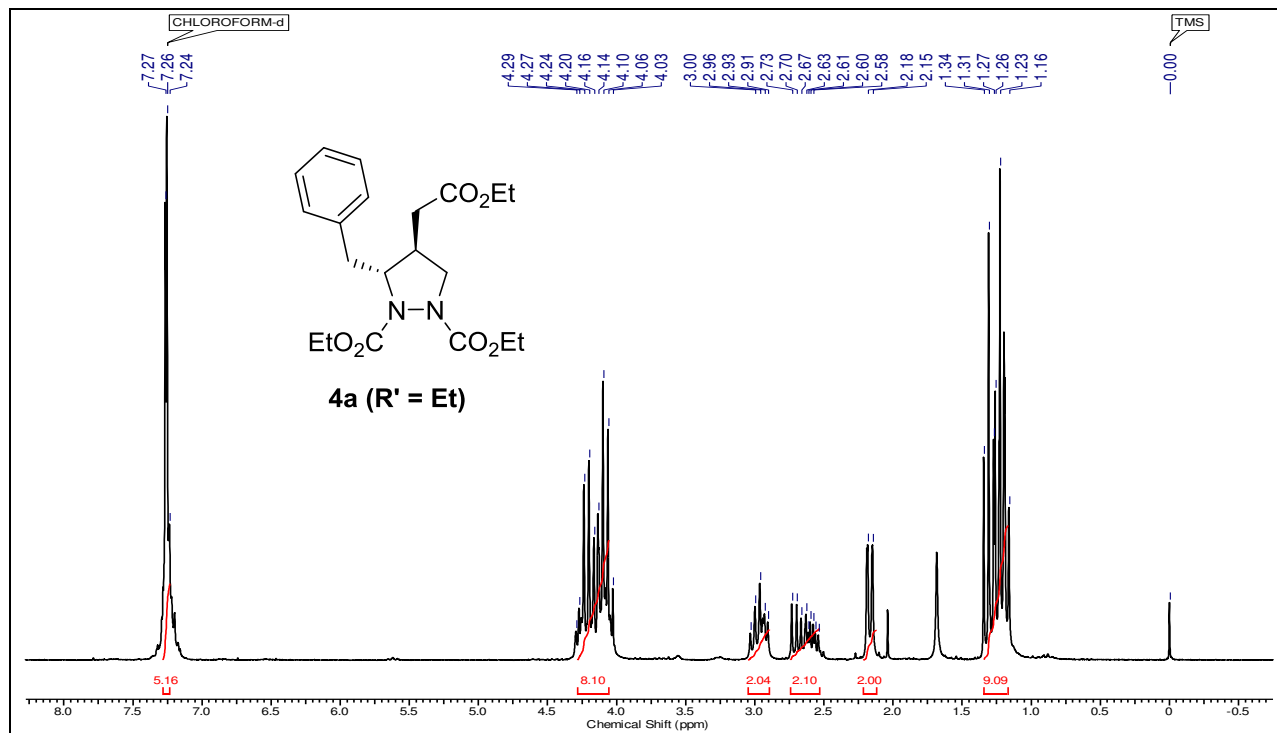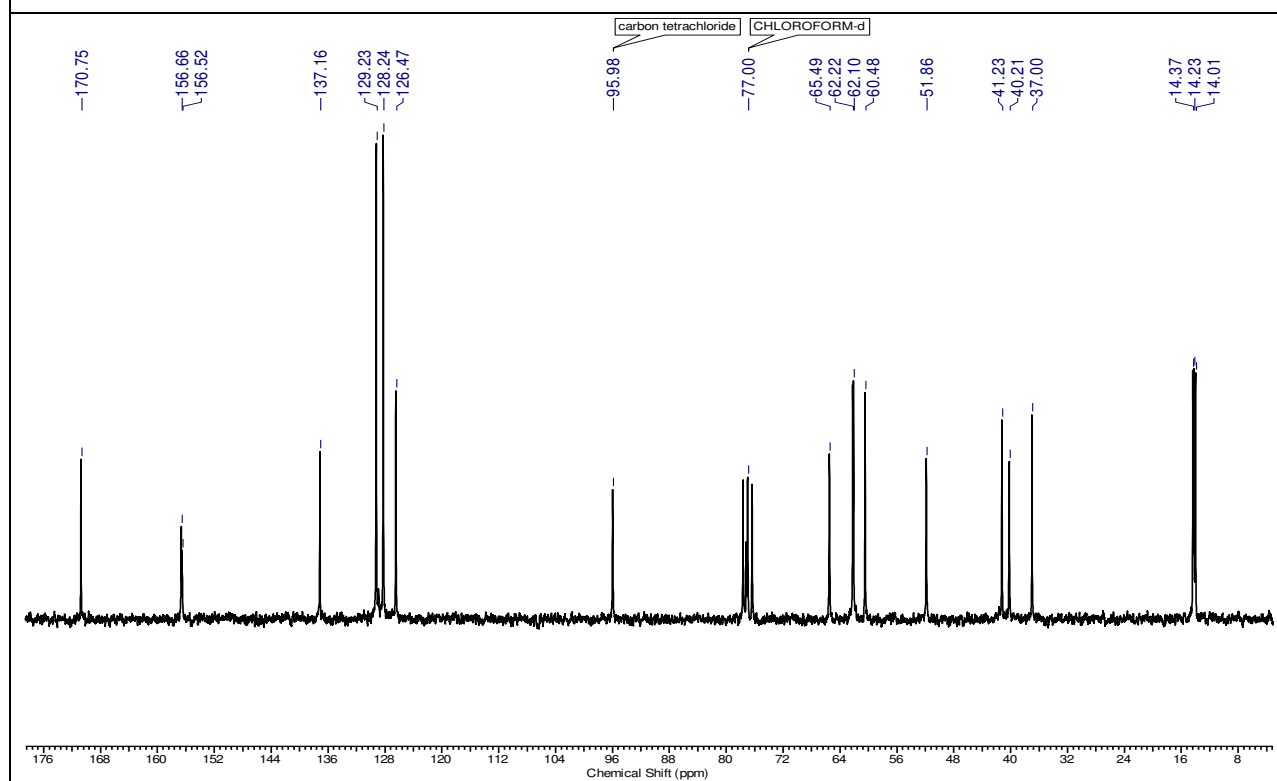

**<sup>1</sup>H & <sup>13</sup>C spectra of 4a (R' = Et)**

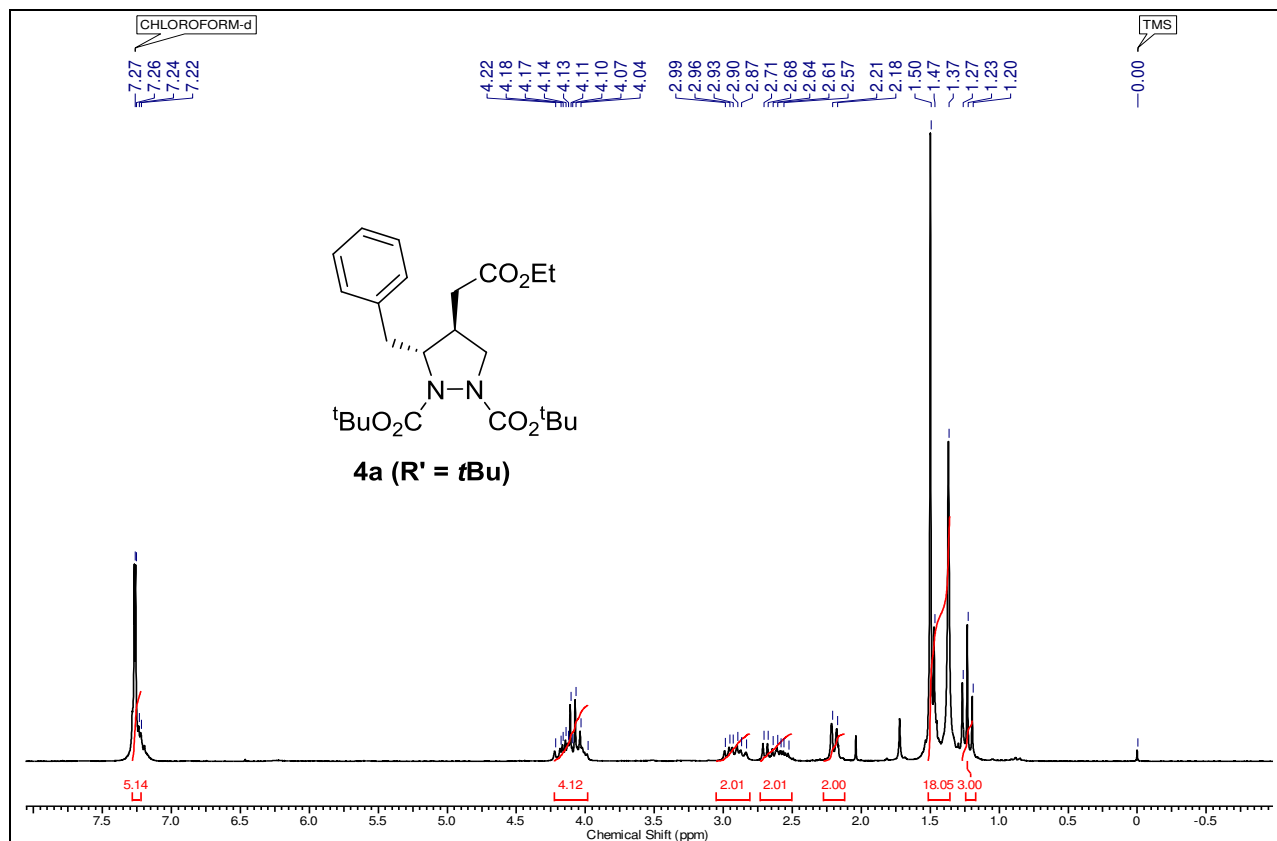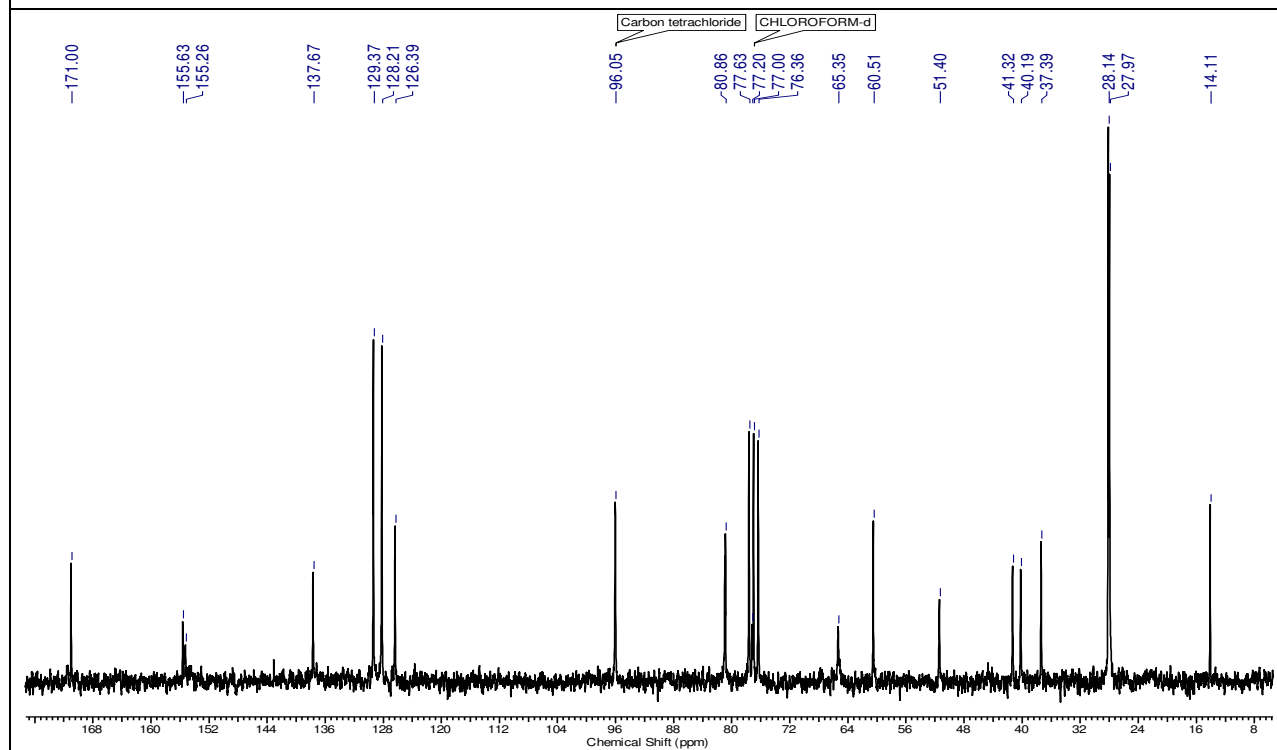

<sup>1</sup>H & <sup>13</sup>C spectra of **4a** (R' = t-Bu)

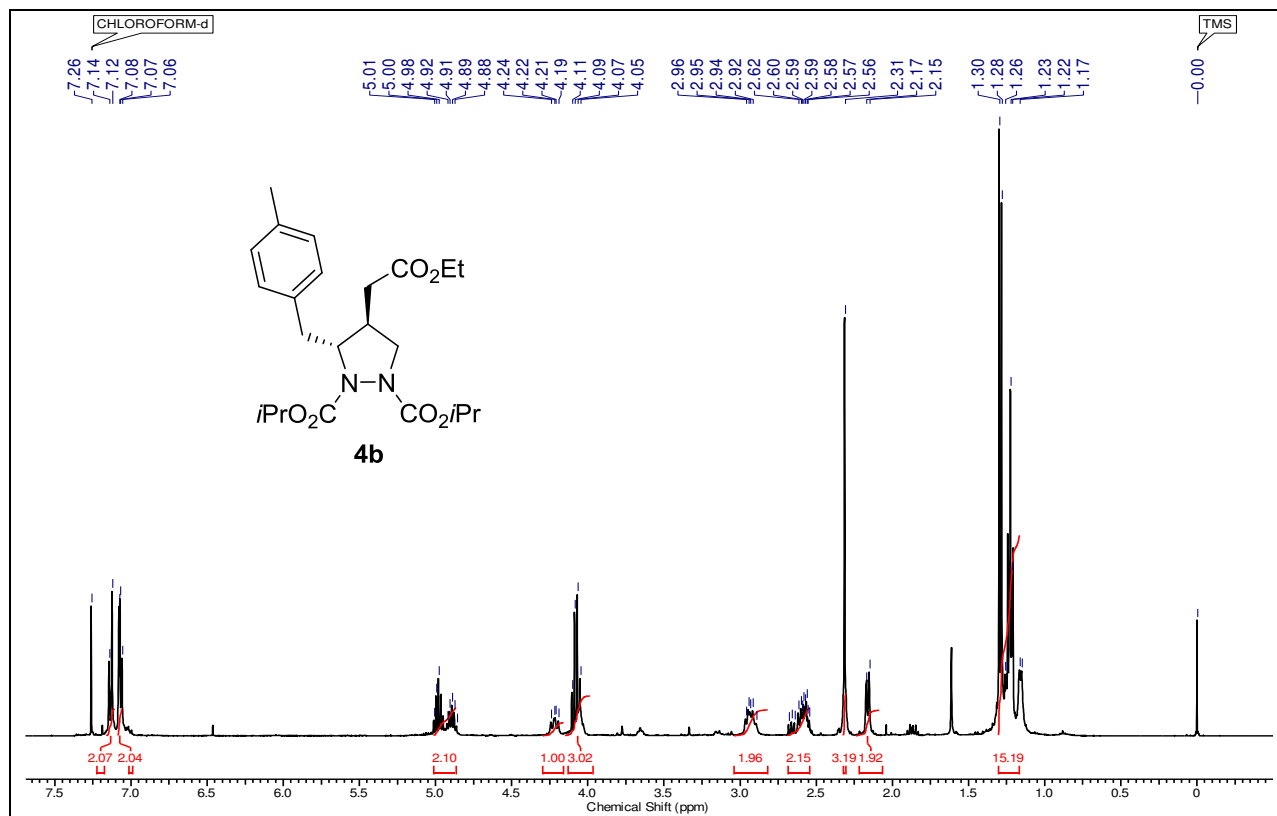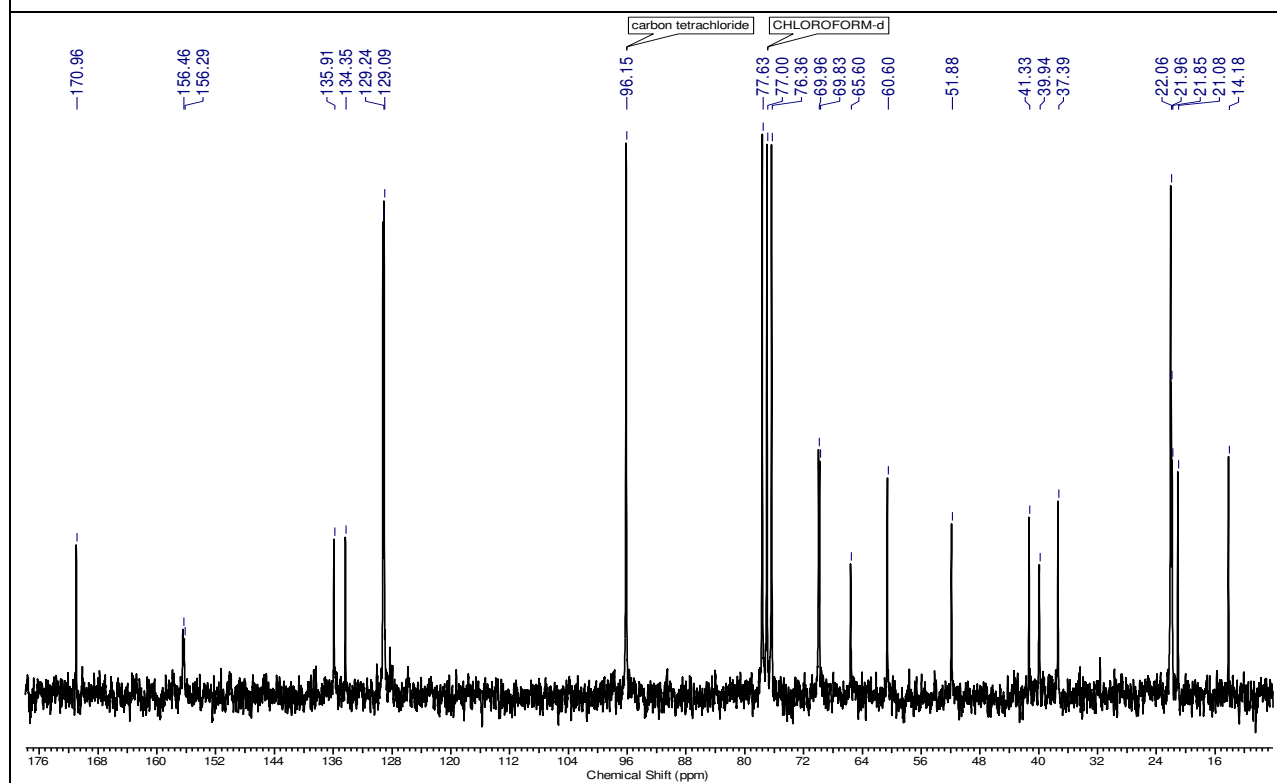

$^1\text{H}$  &  $^{13}\text{C}$  spectra of **4b**

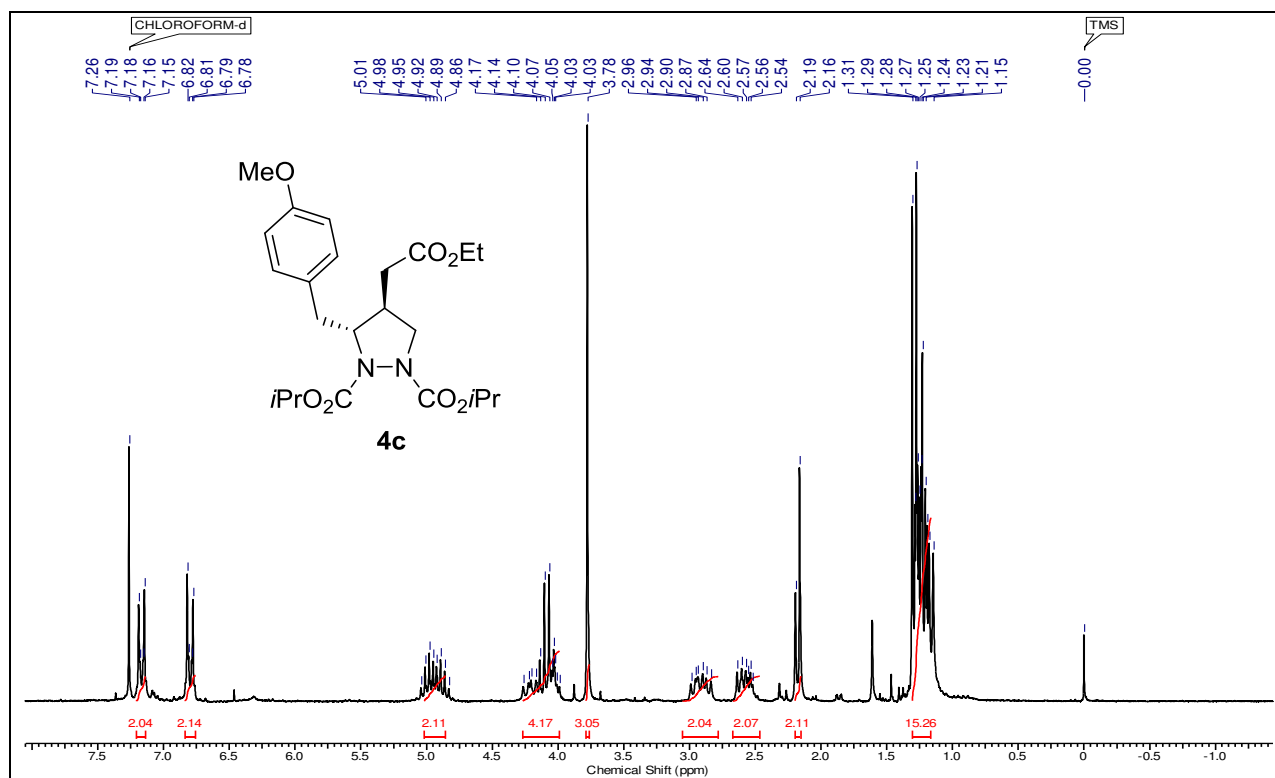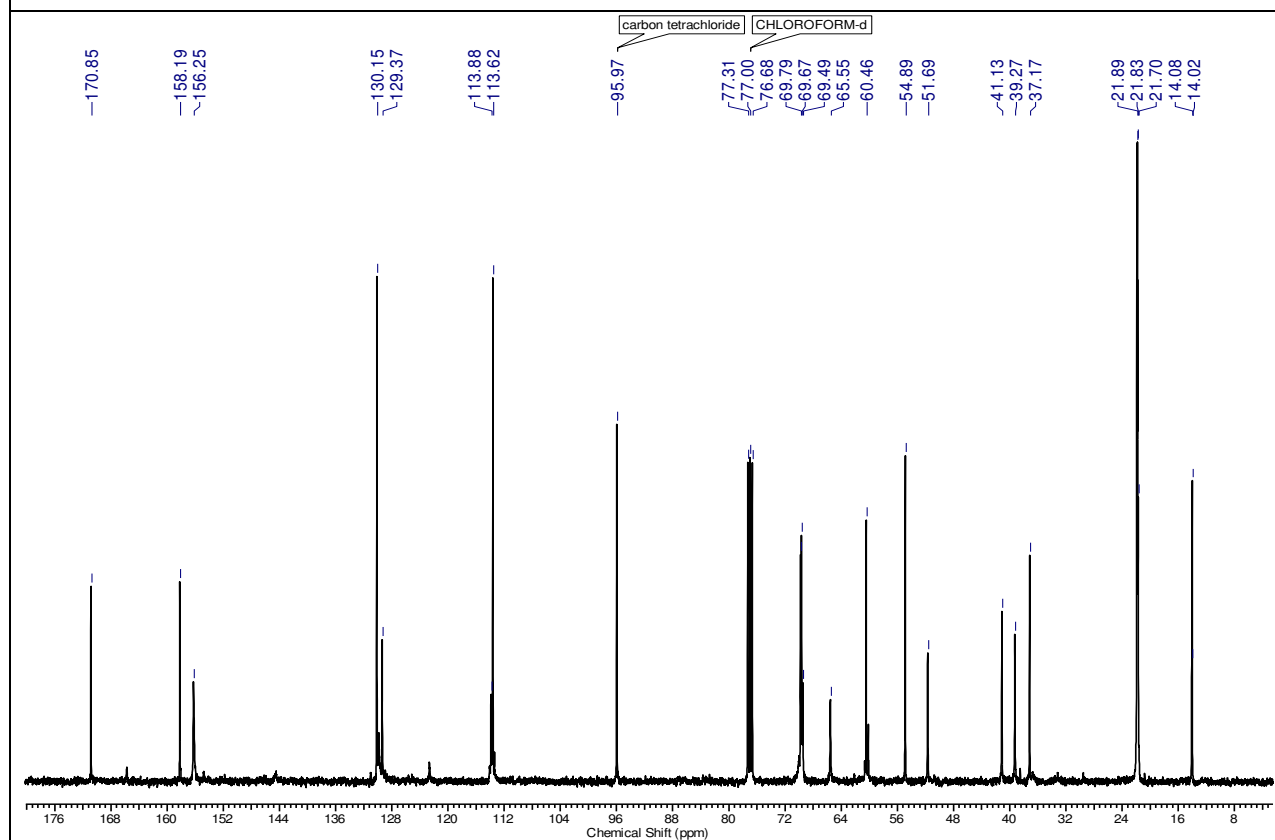

**<sup>1</sup>H & <sup>13</sup>C spectra of 4c**

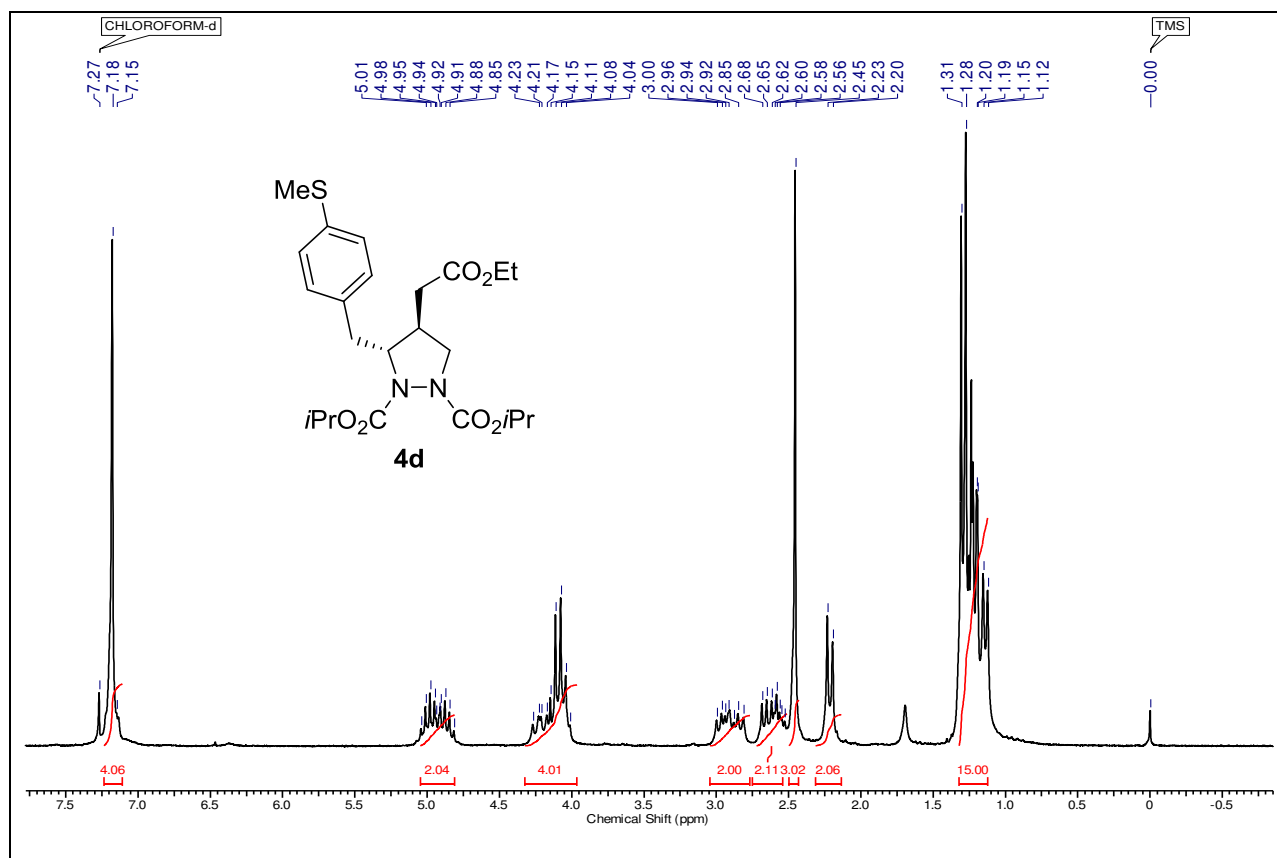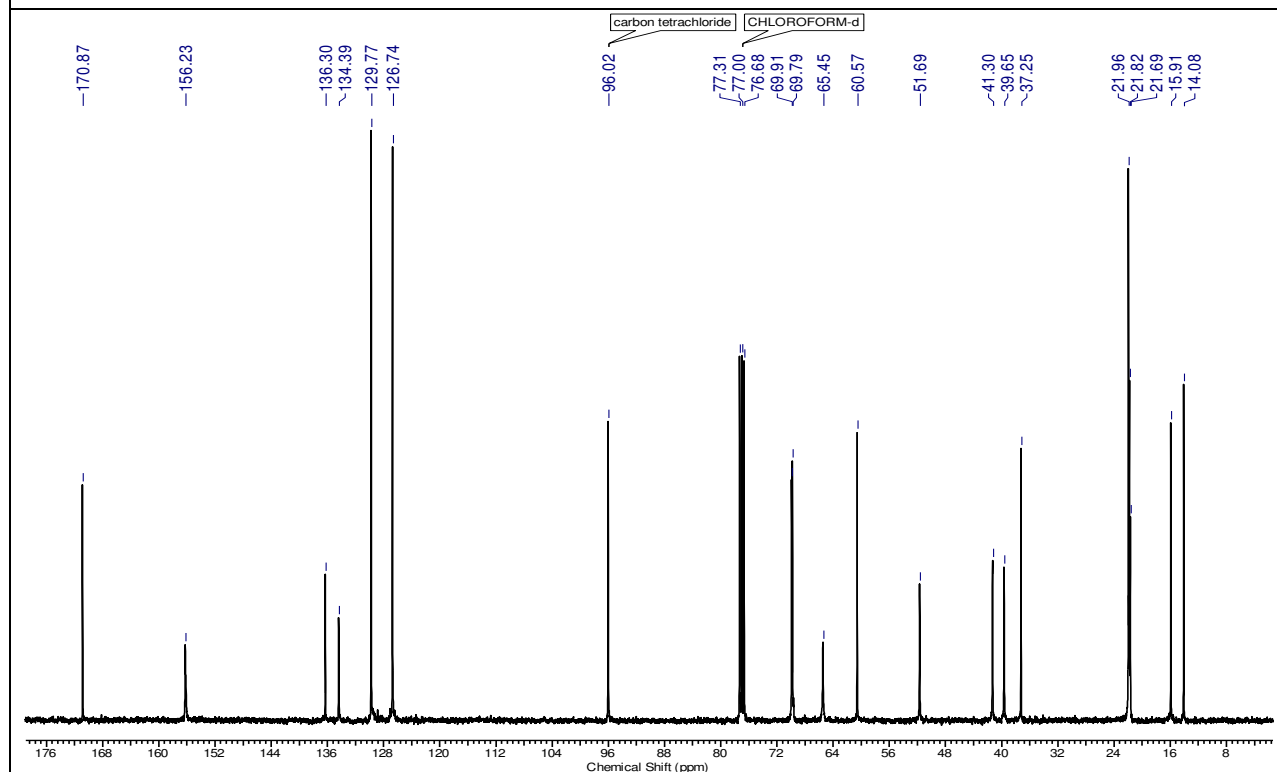

<sup>1</sup>H & <sup>13</sup>C spectra of **4d**



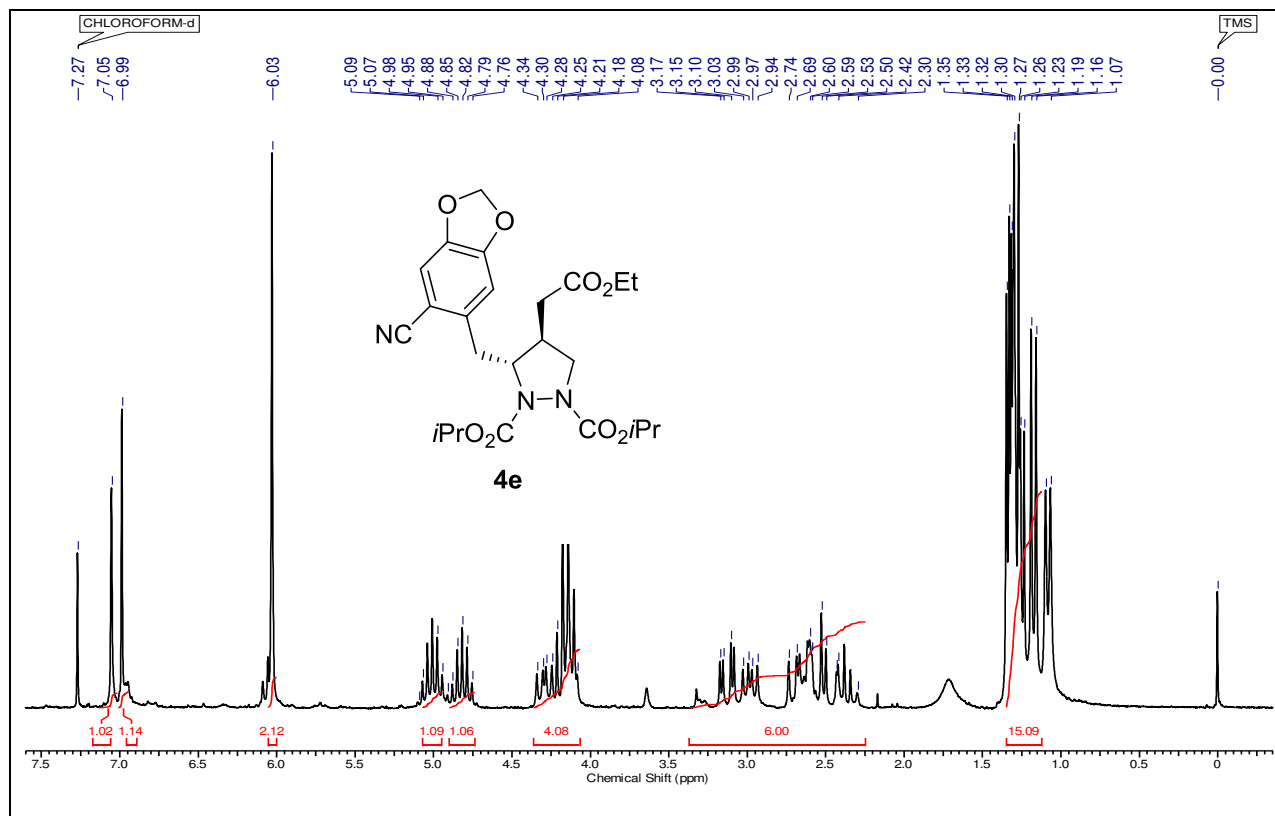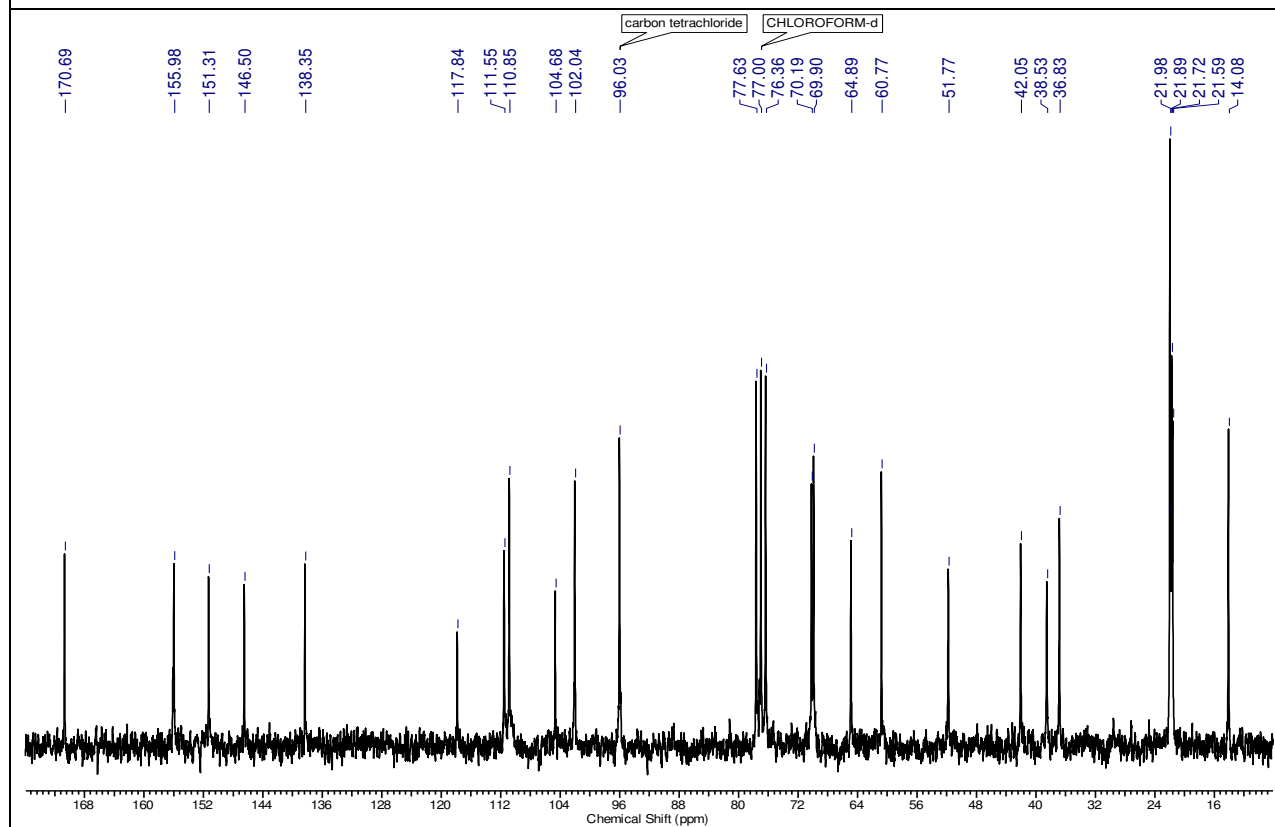

<sup>1</sup>H & <sup>13</sup>C spectra of **4e**

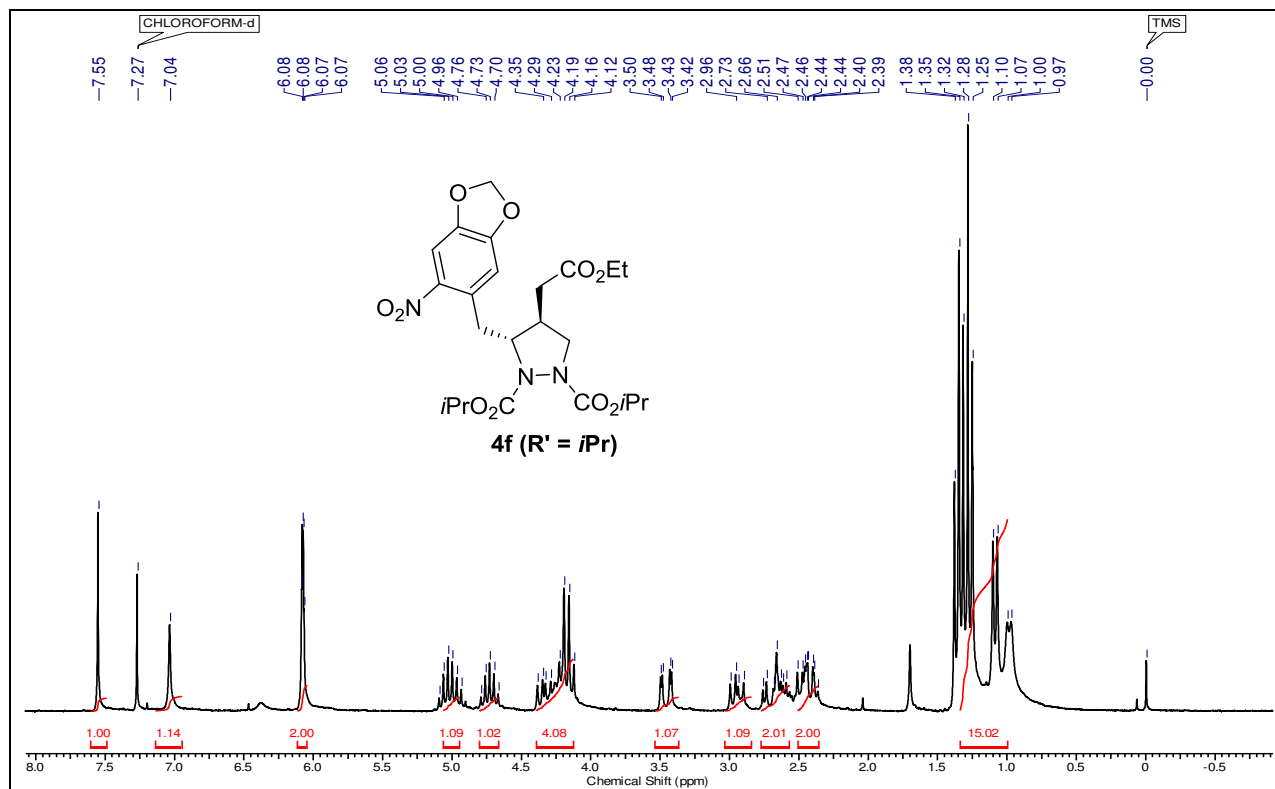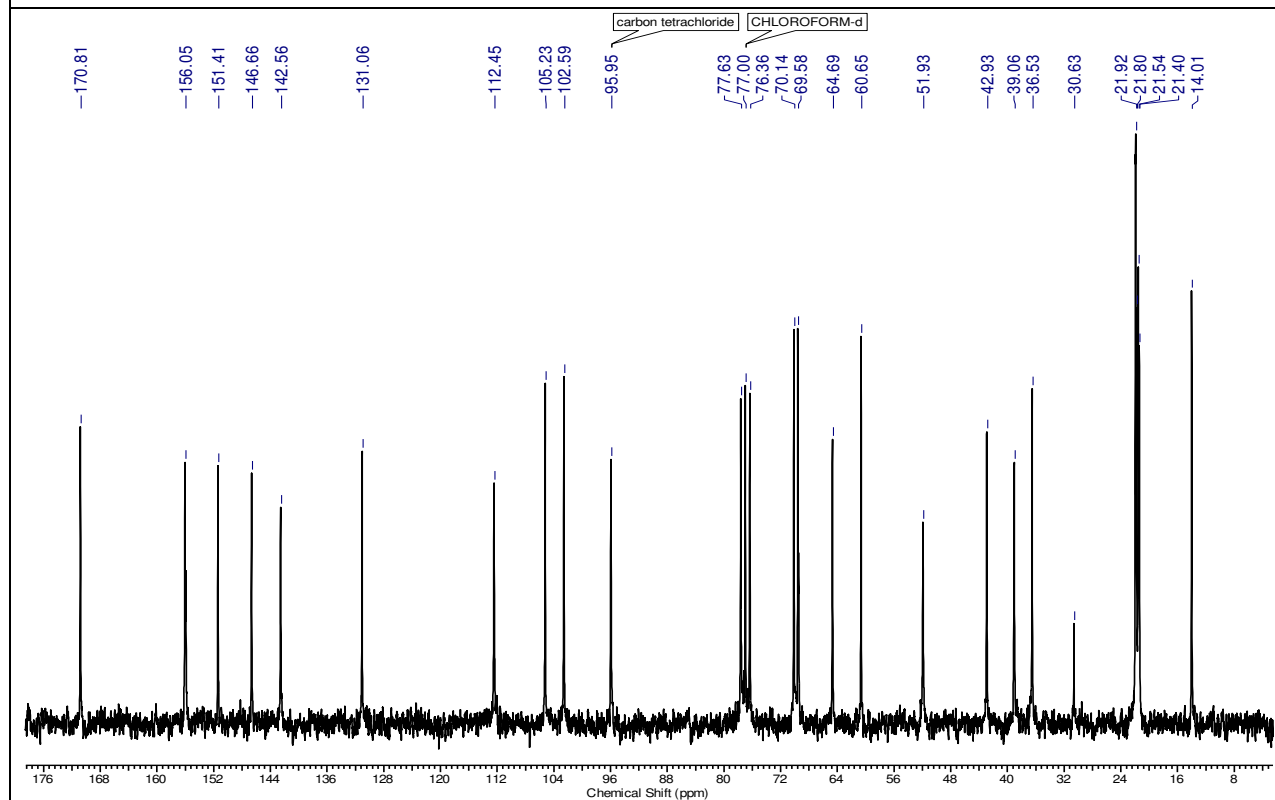

$^1\text{H}$  &  $^{13}\text{C}$  spectra of **4f**

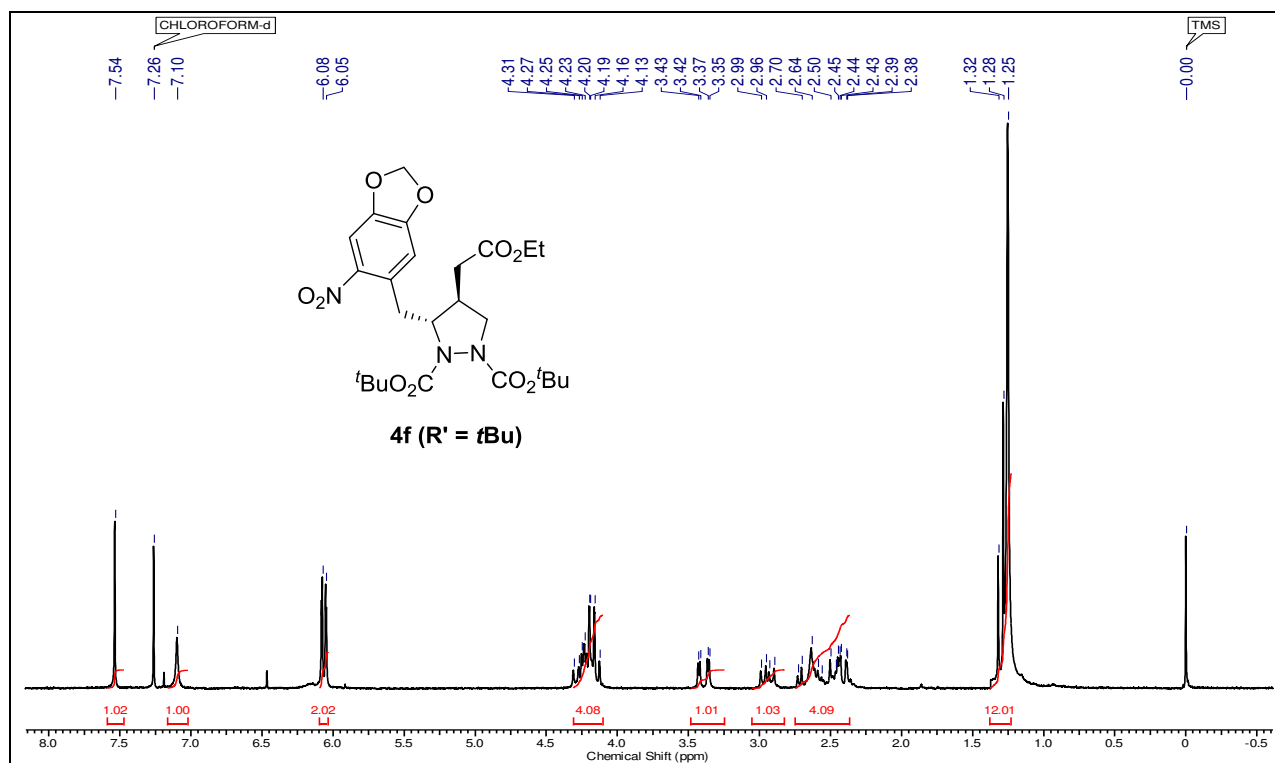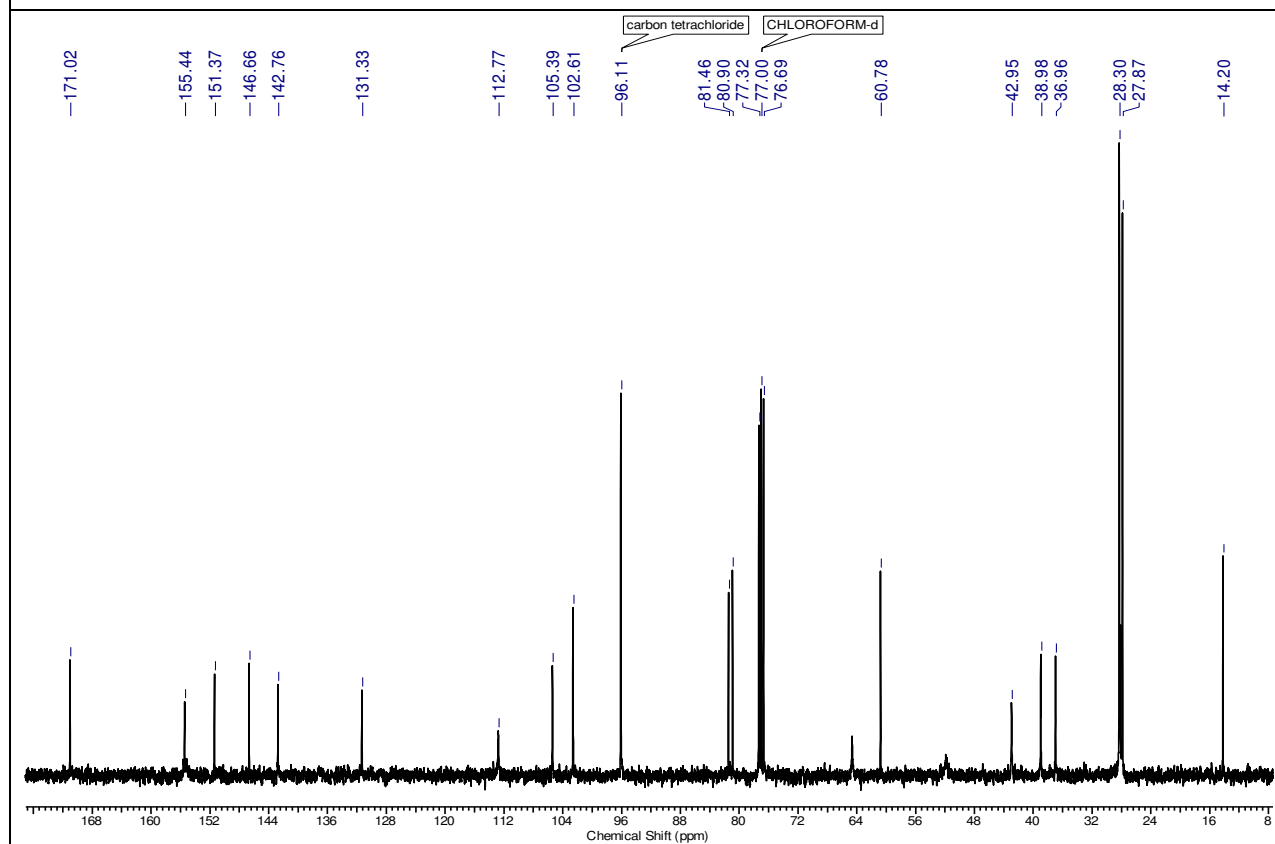

$^1\text{H}$  &  $^{13}\text{C}$  spectra of **4f**

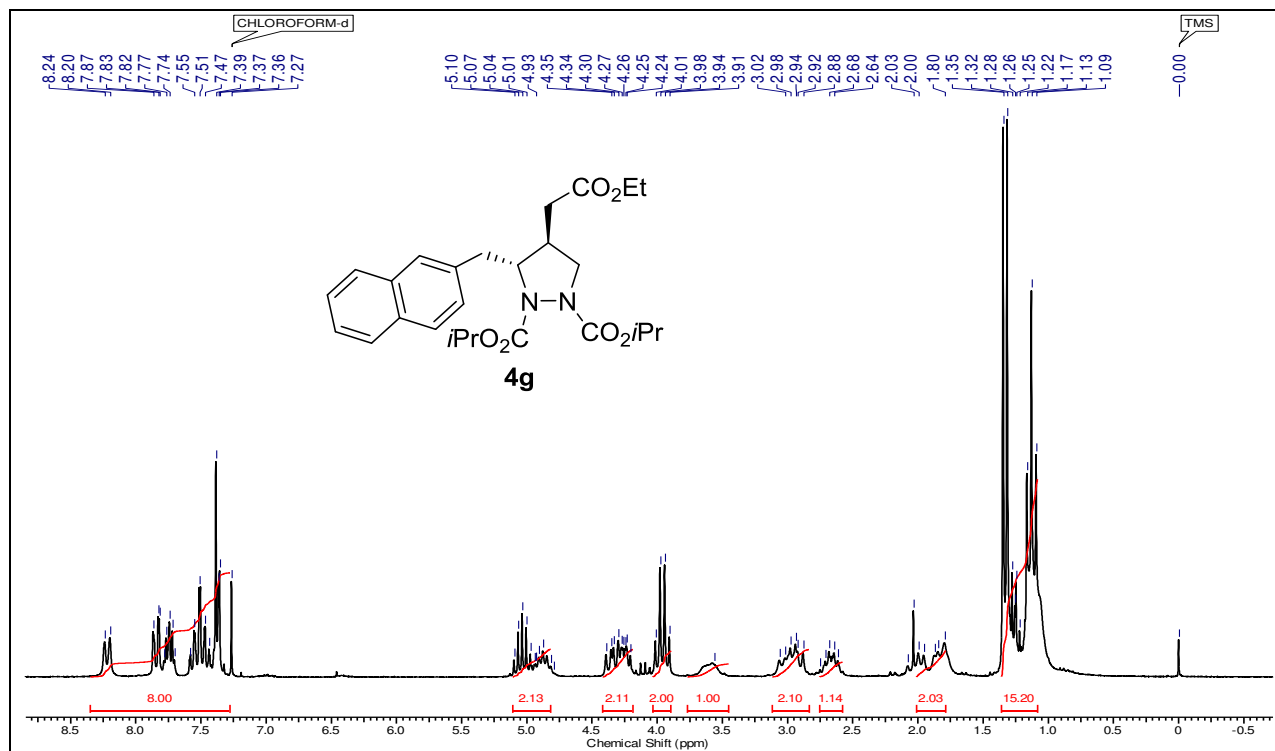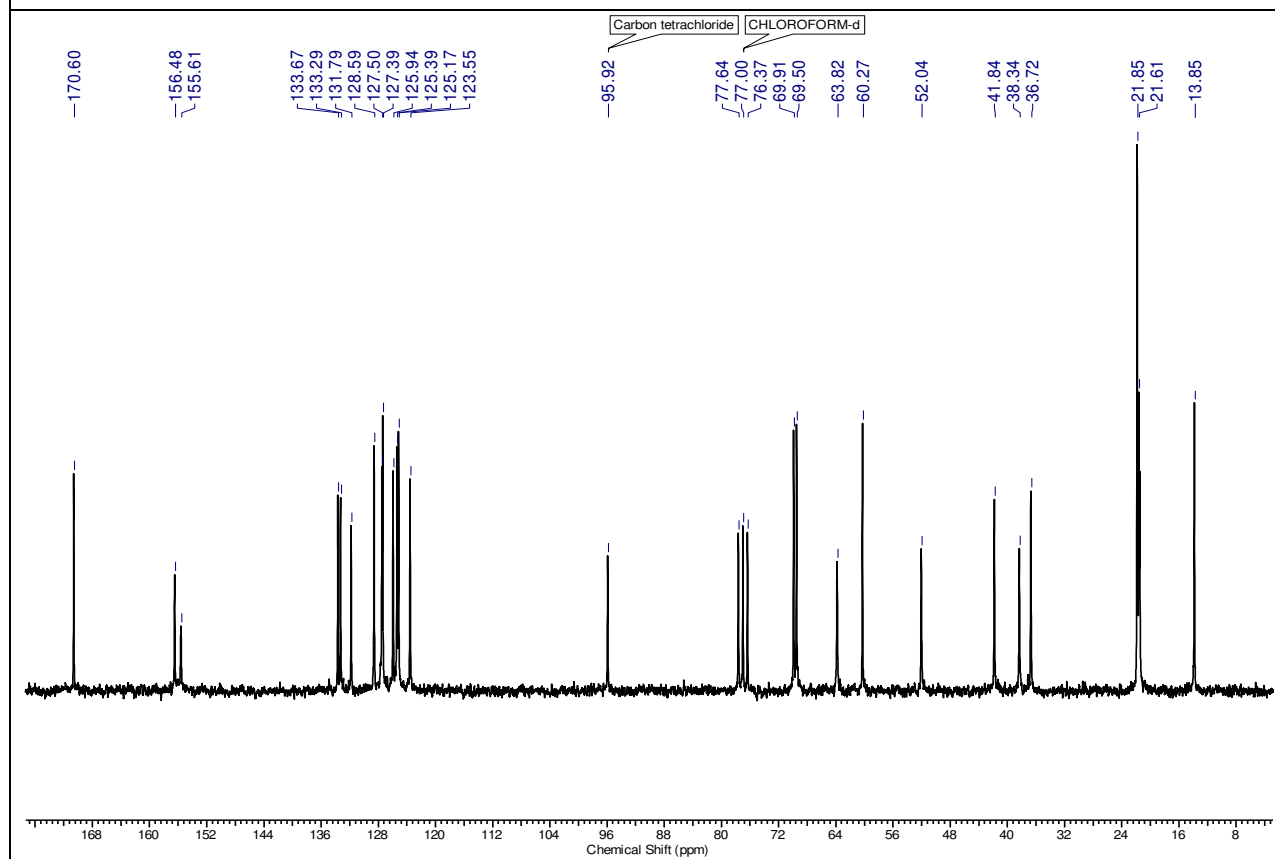

$^1\text{H}$  &  $^{13}\text{C}$  spectra of **4g**

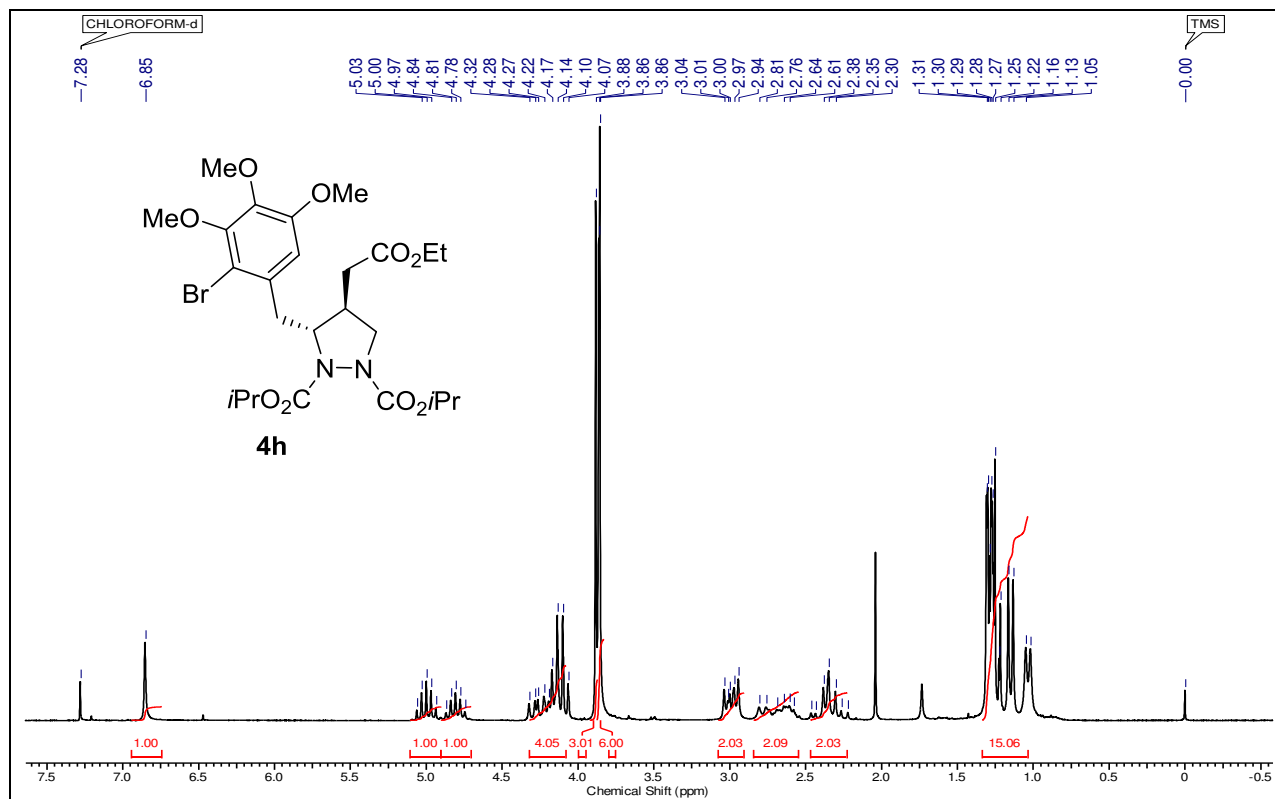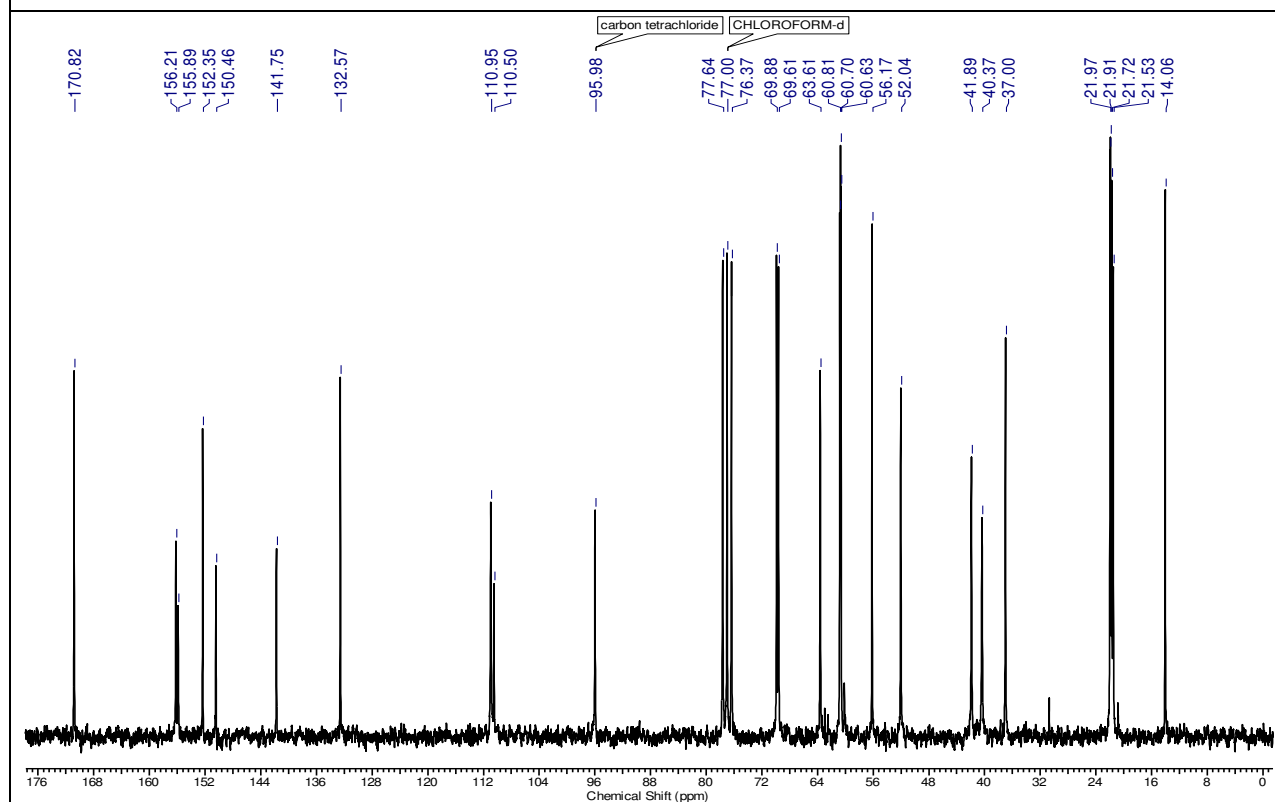

<sup>1</sup>H & <sup>13</sup>C spectra of **4h**

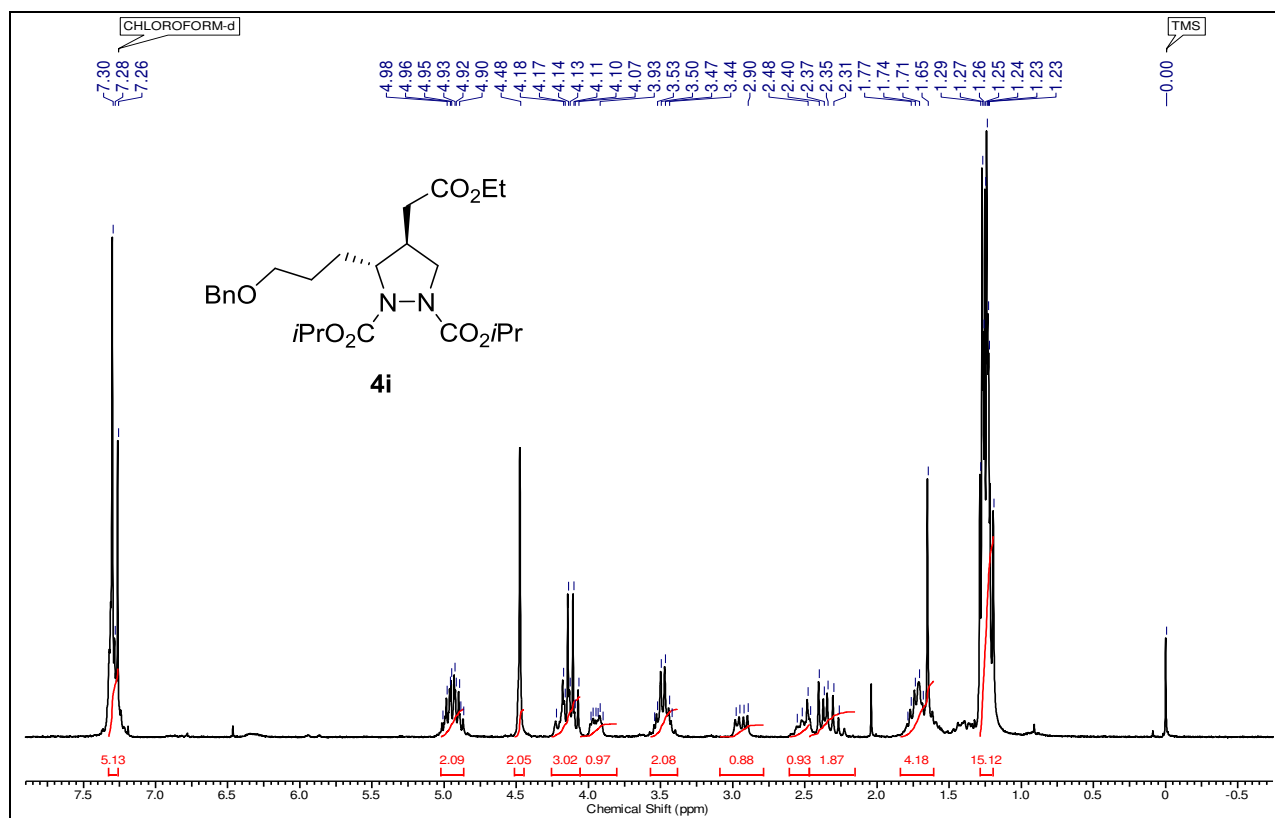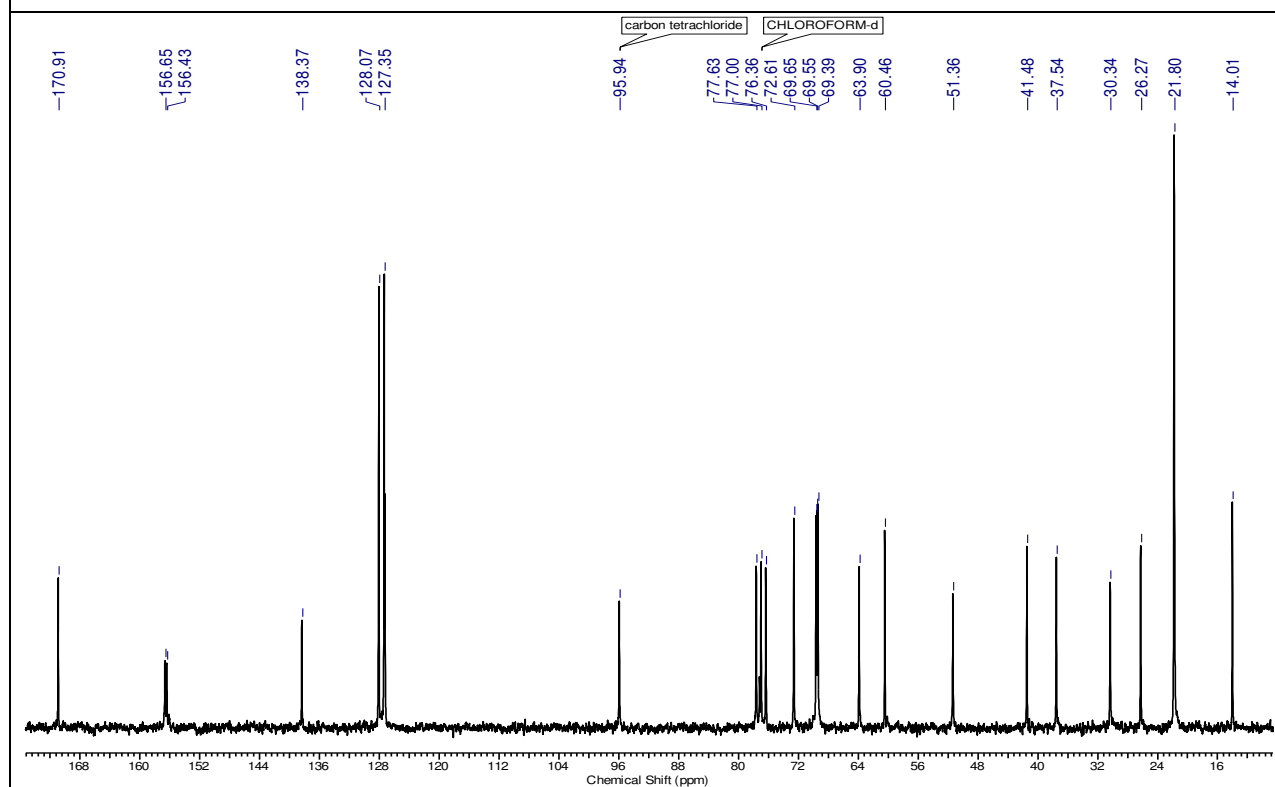

<sup>1</sup>H & <sup>13</sup>C spectra of **4i**

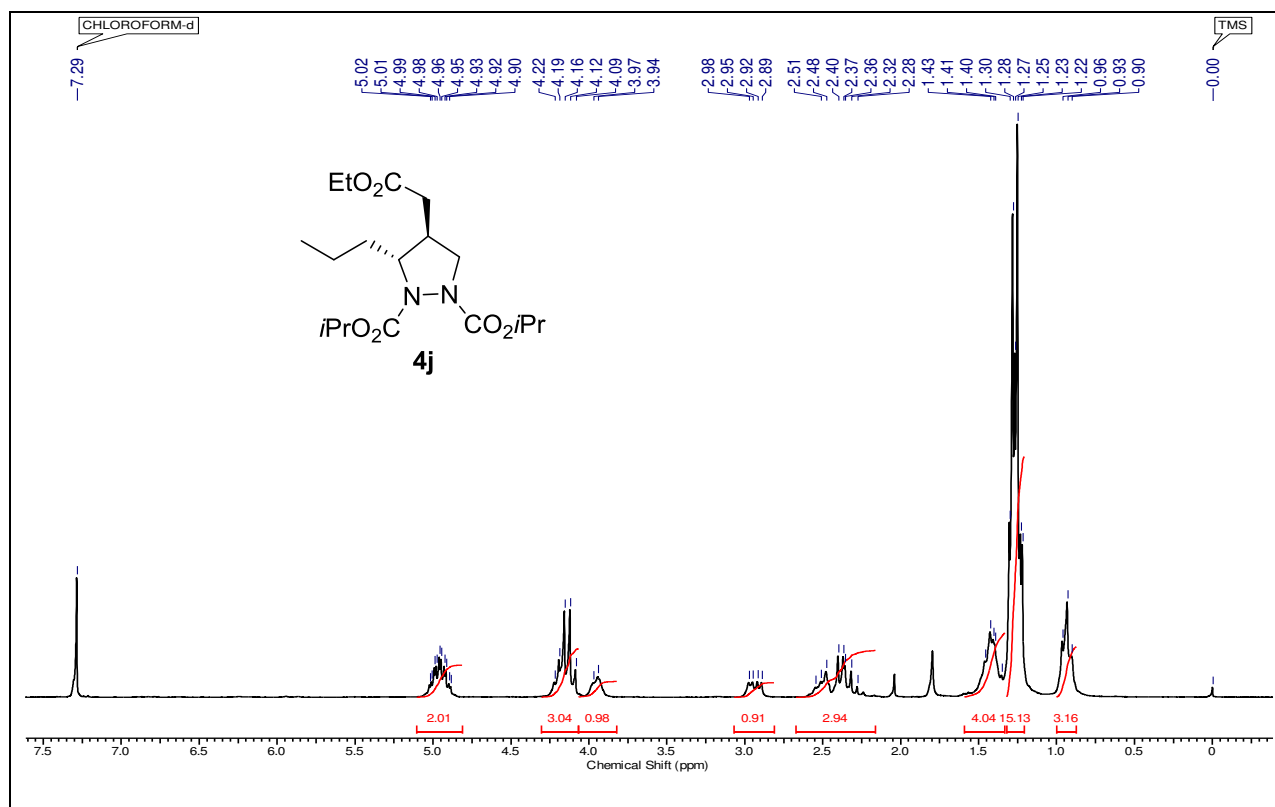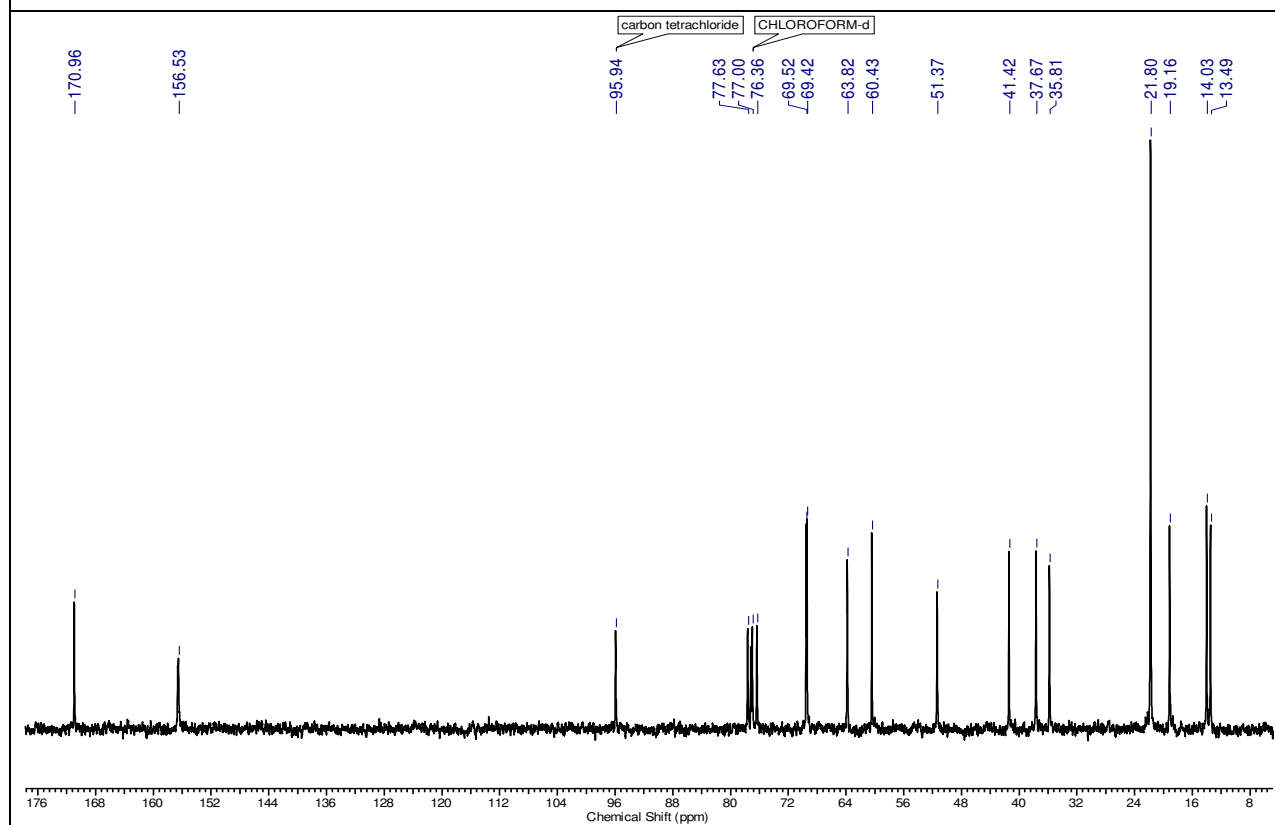

$^1\text{H}$  &  $^{13}\text{C}$  spectra of **4j**

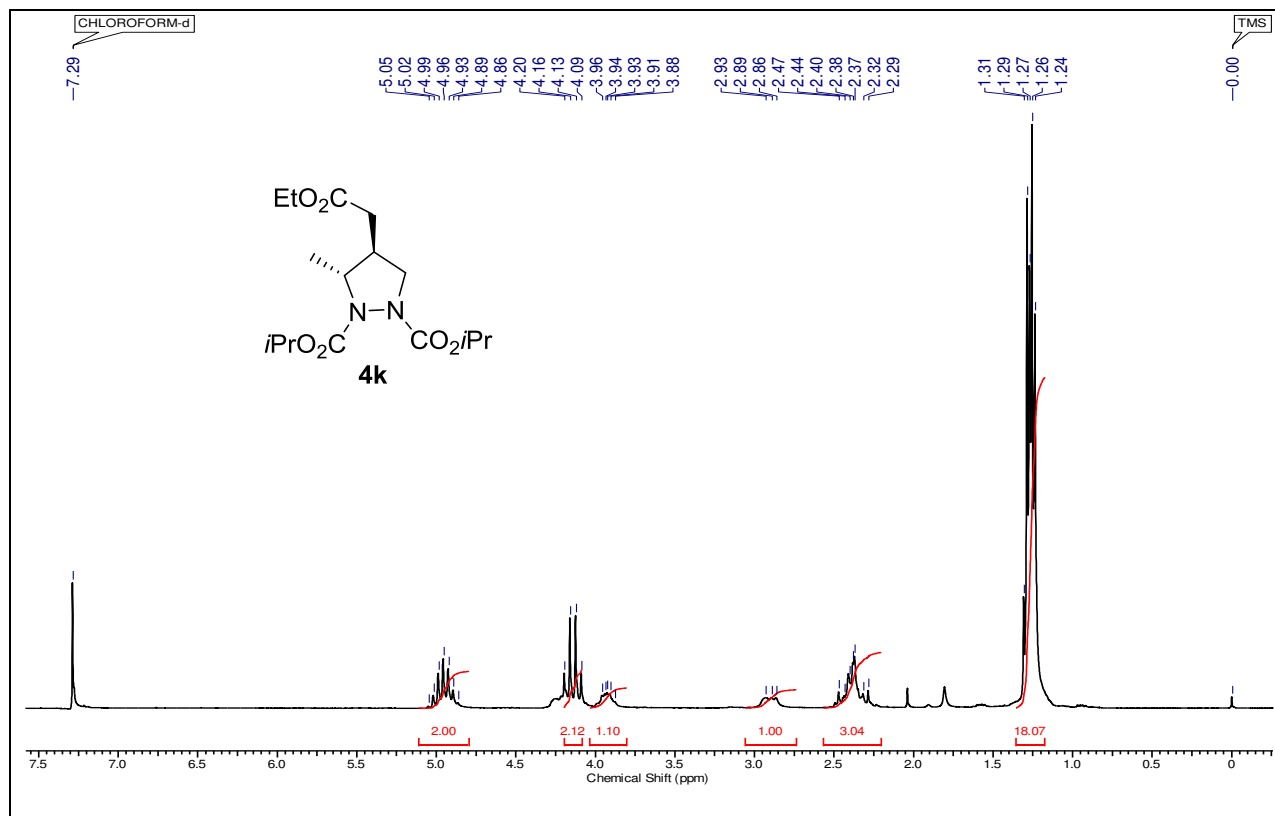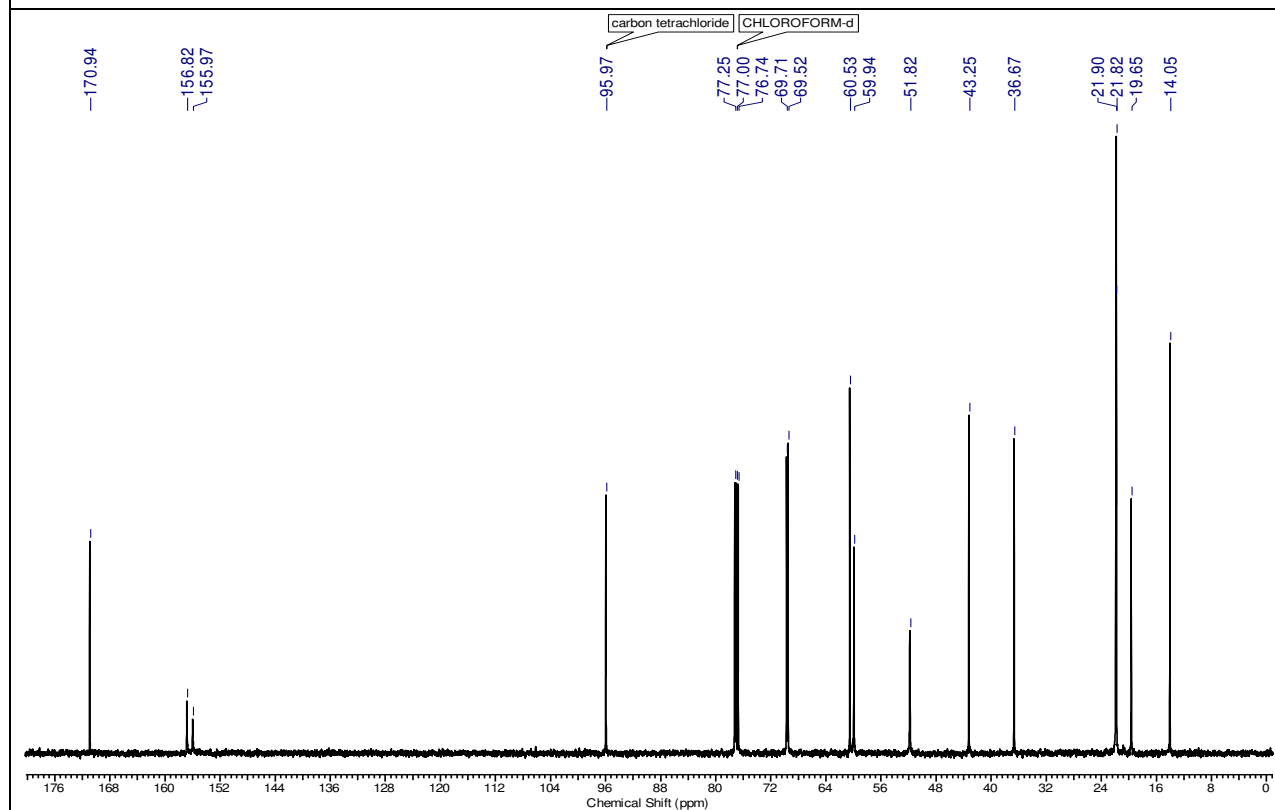

<sup>1</sup>H & <sup>13</sup>C spectra of **4k**



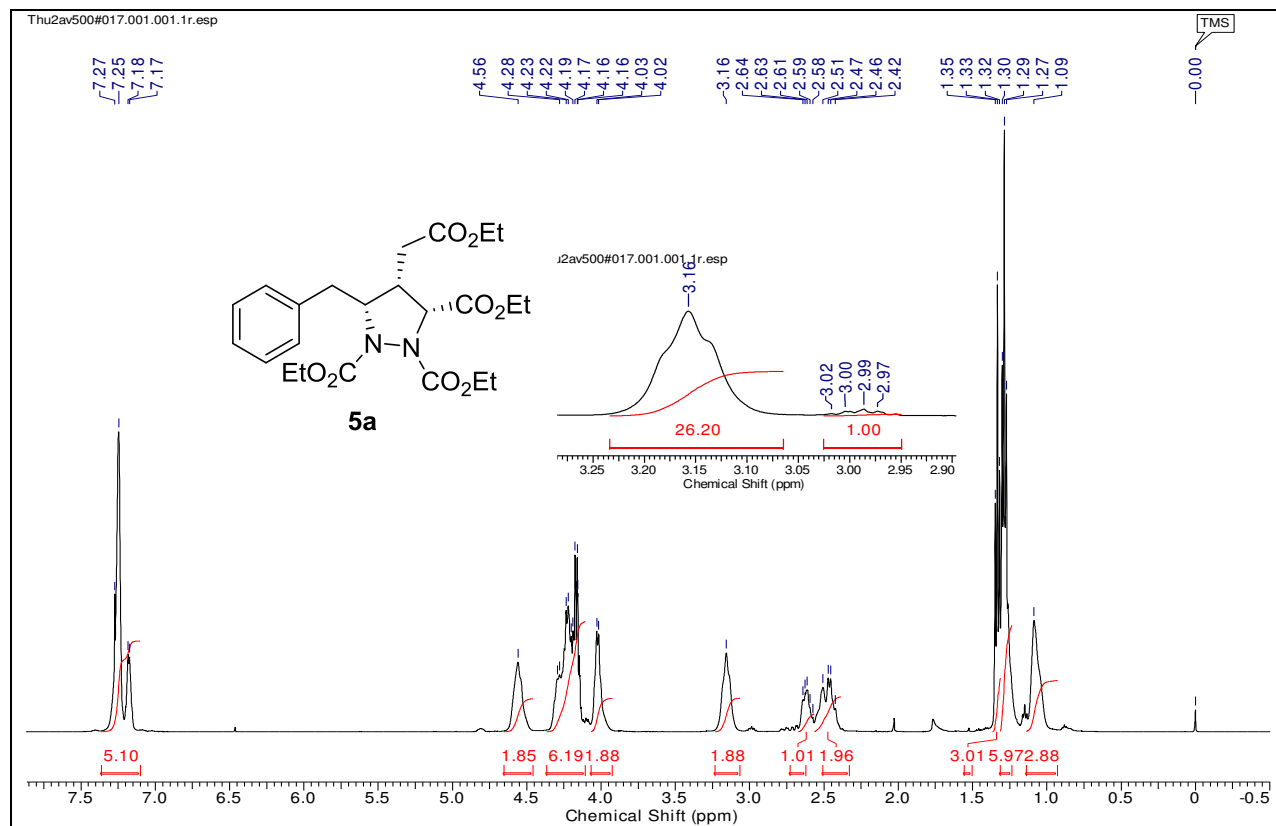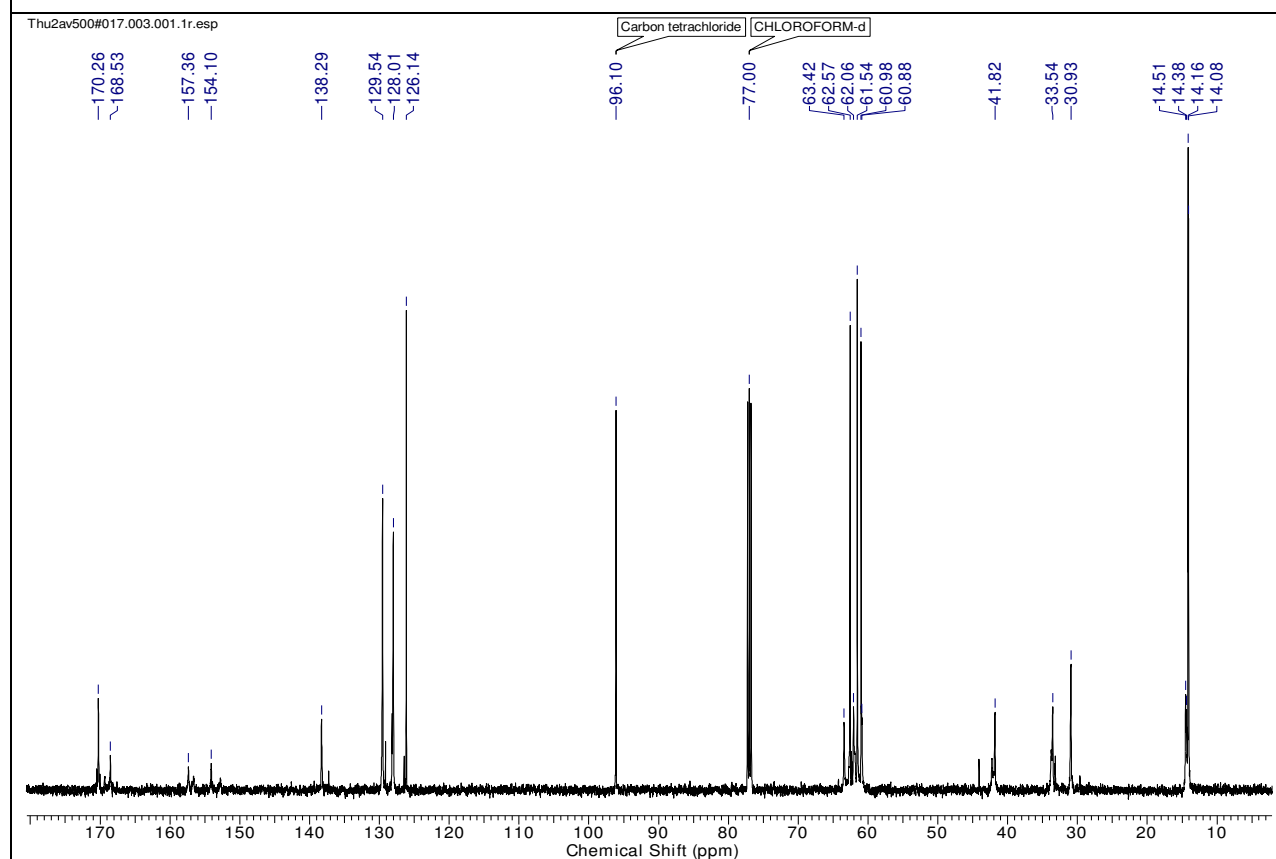

<sup>1</sup>H and <sup>13</sup>C NMR of **5a** (R' = Et)

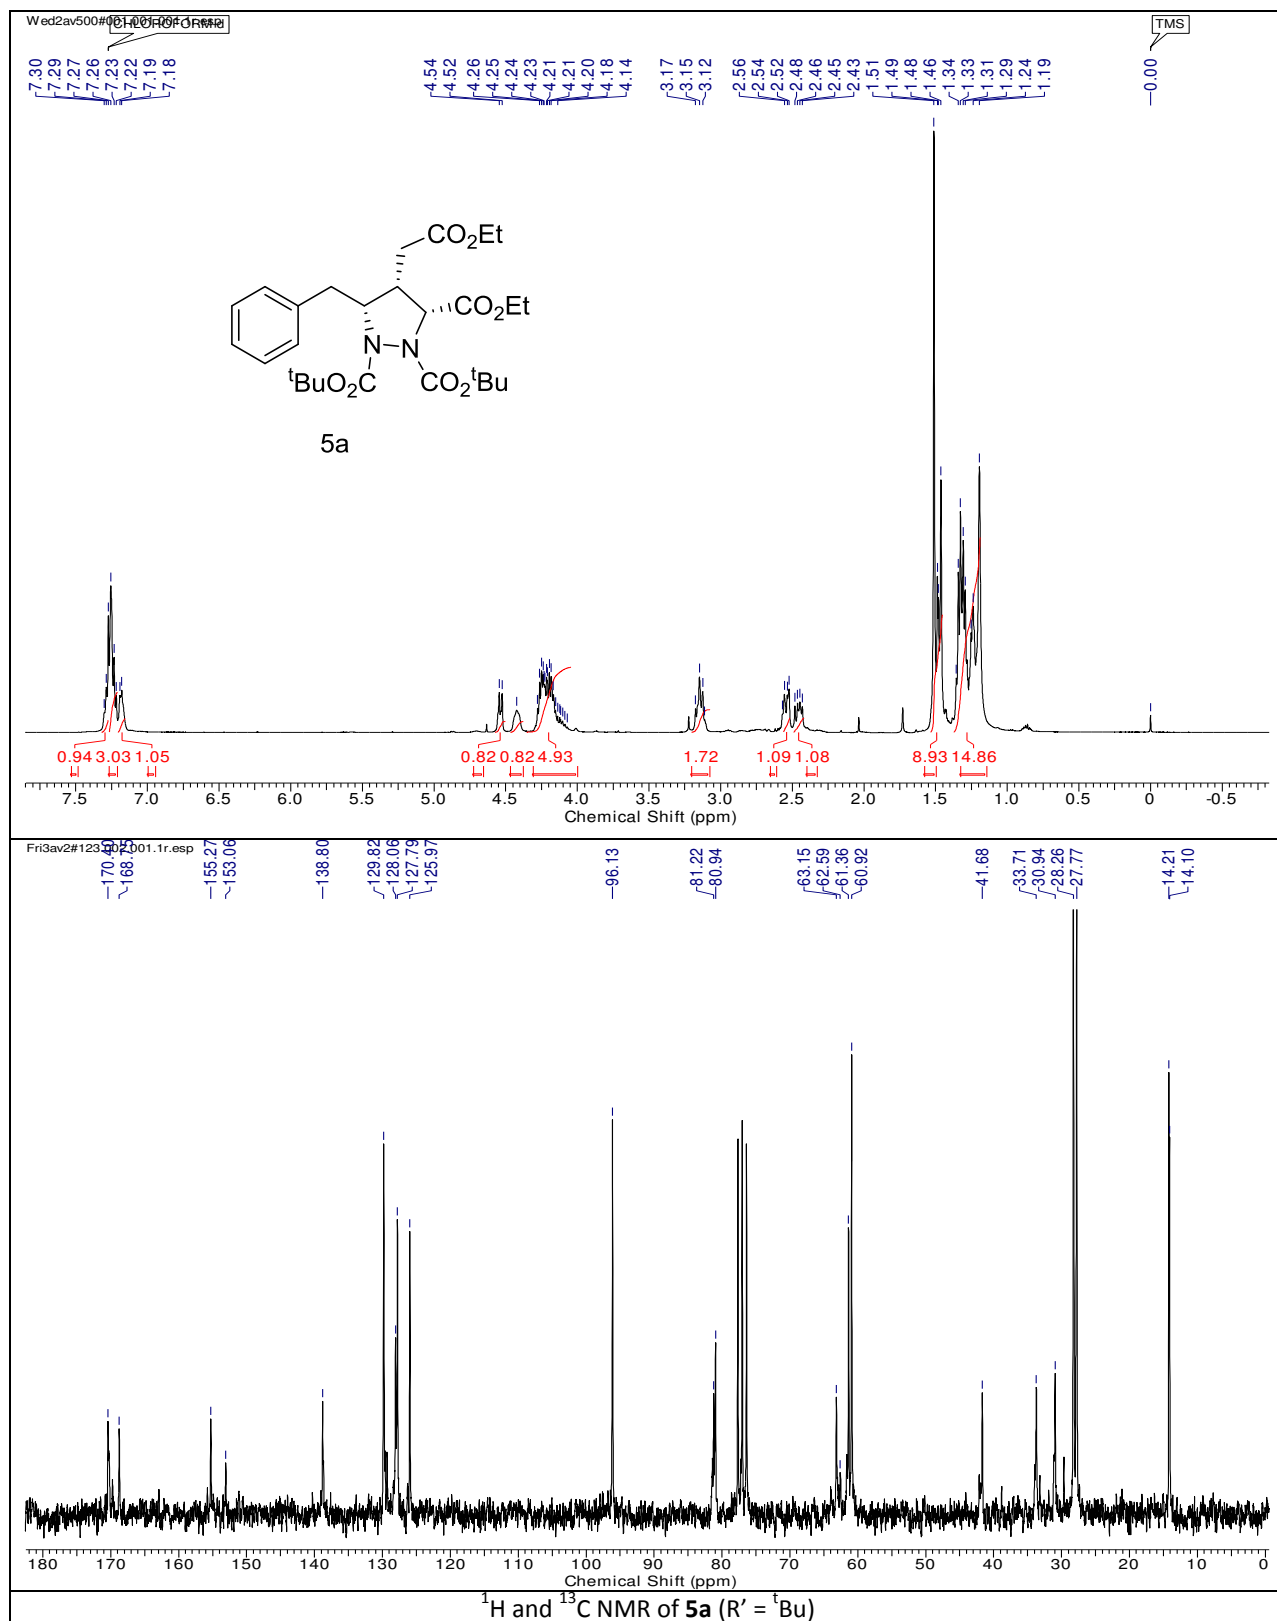

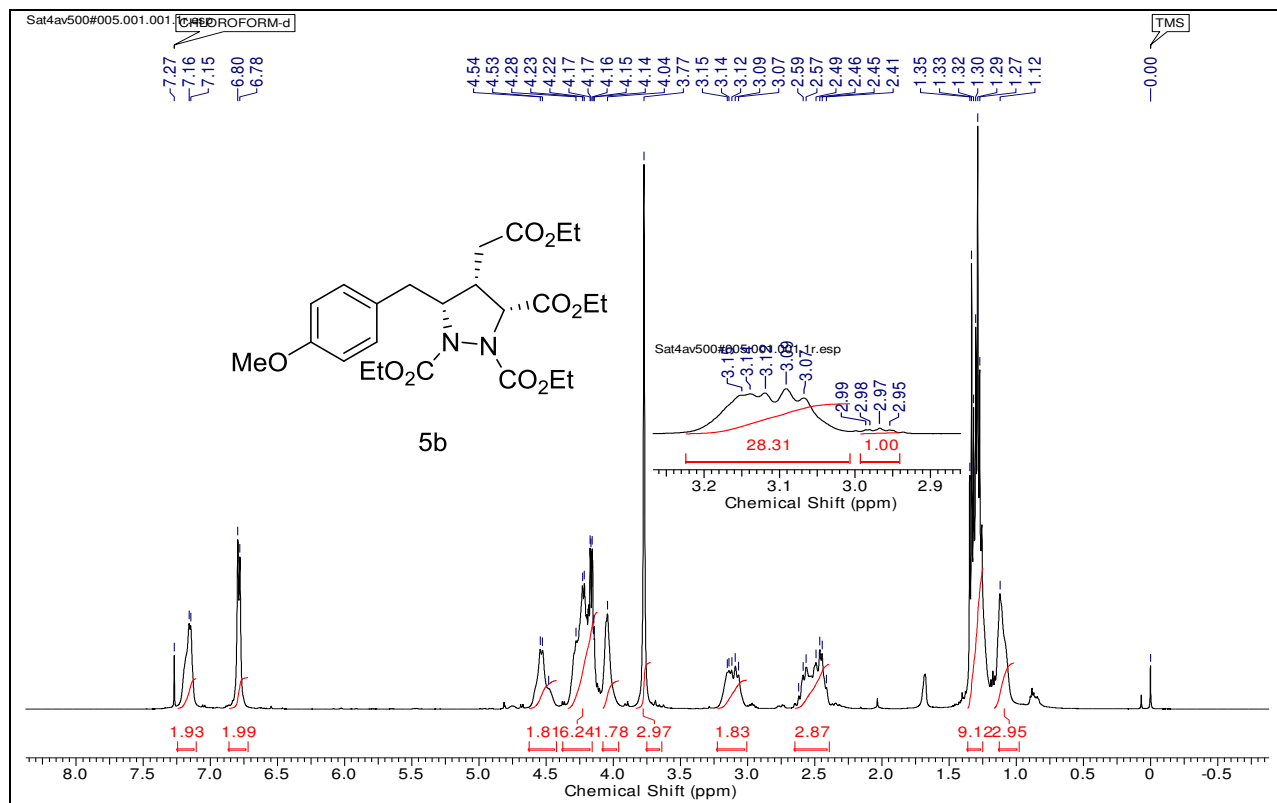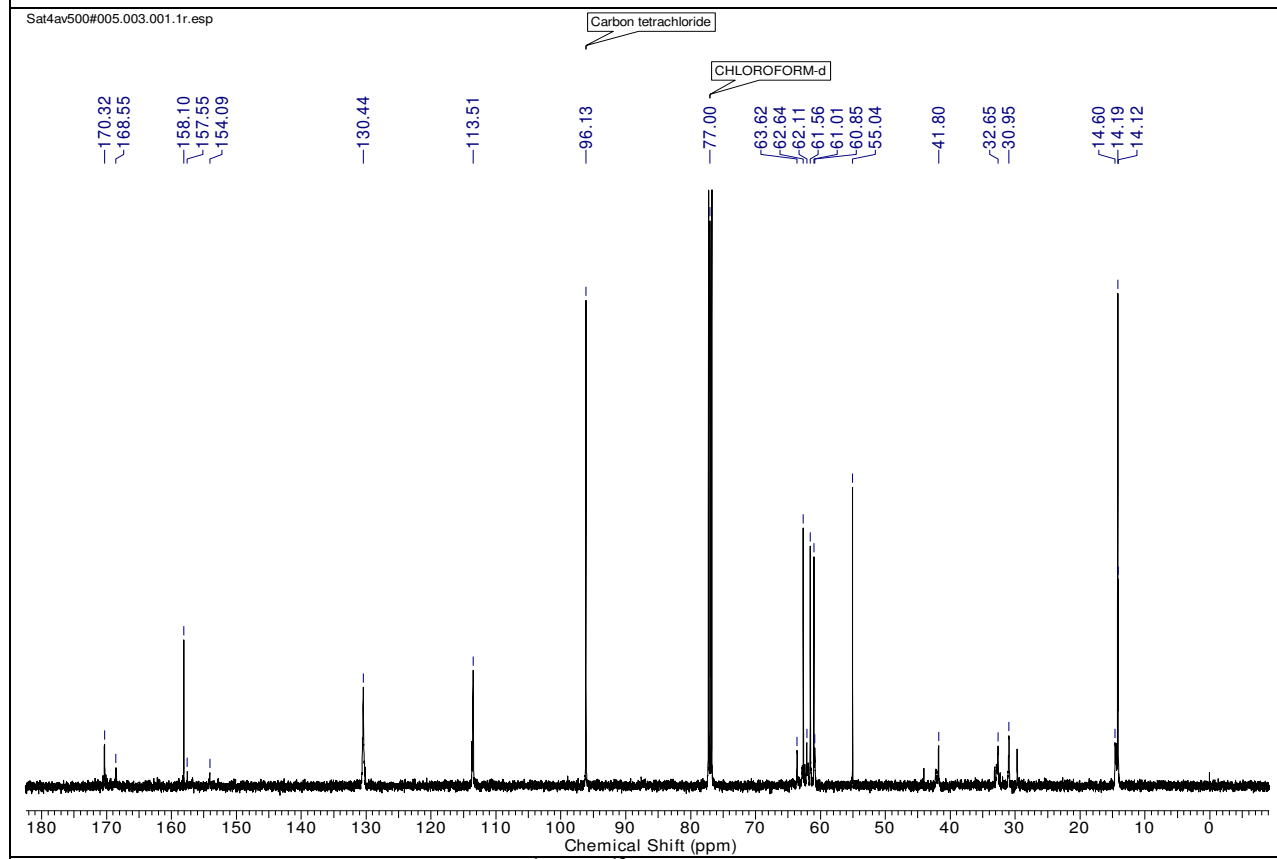

<sup>1</sup>H and <sup>13</sup>C NMR of 5b

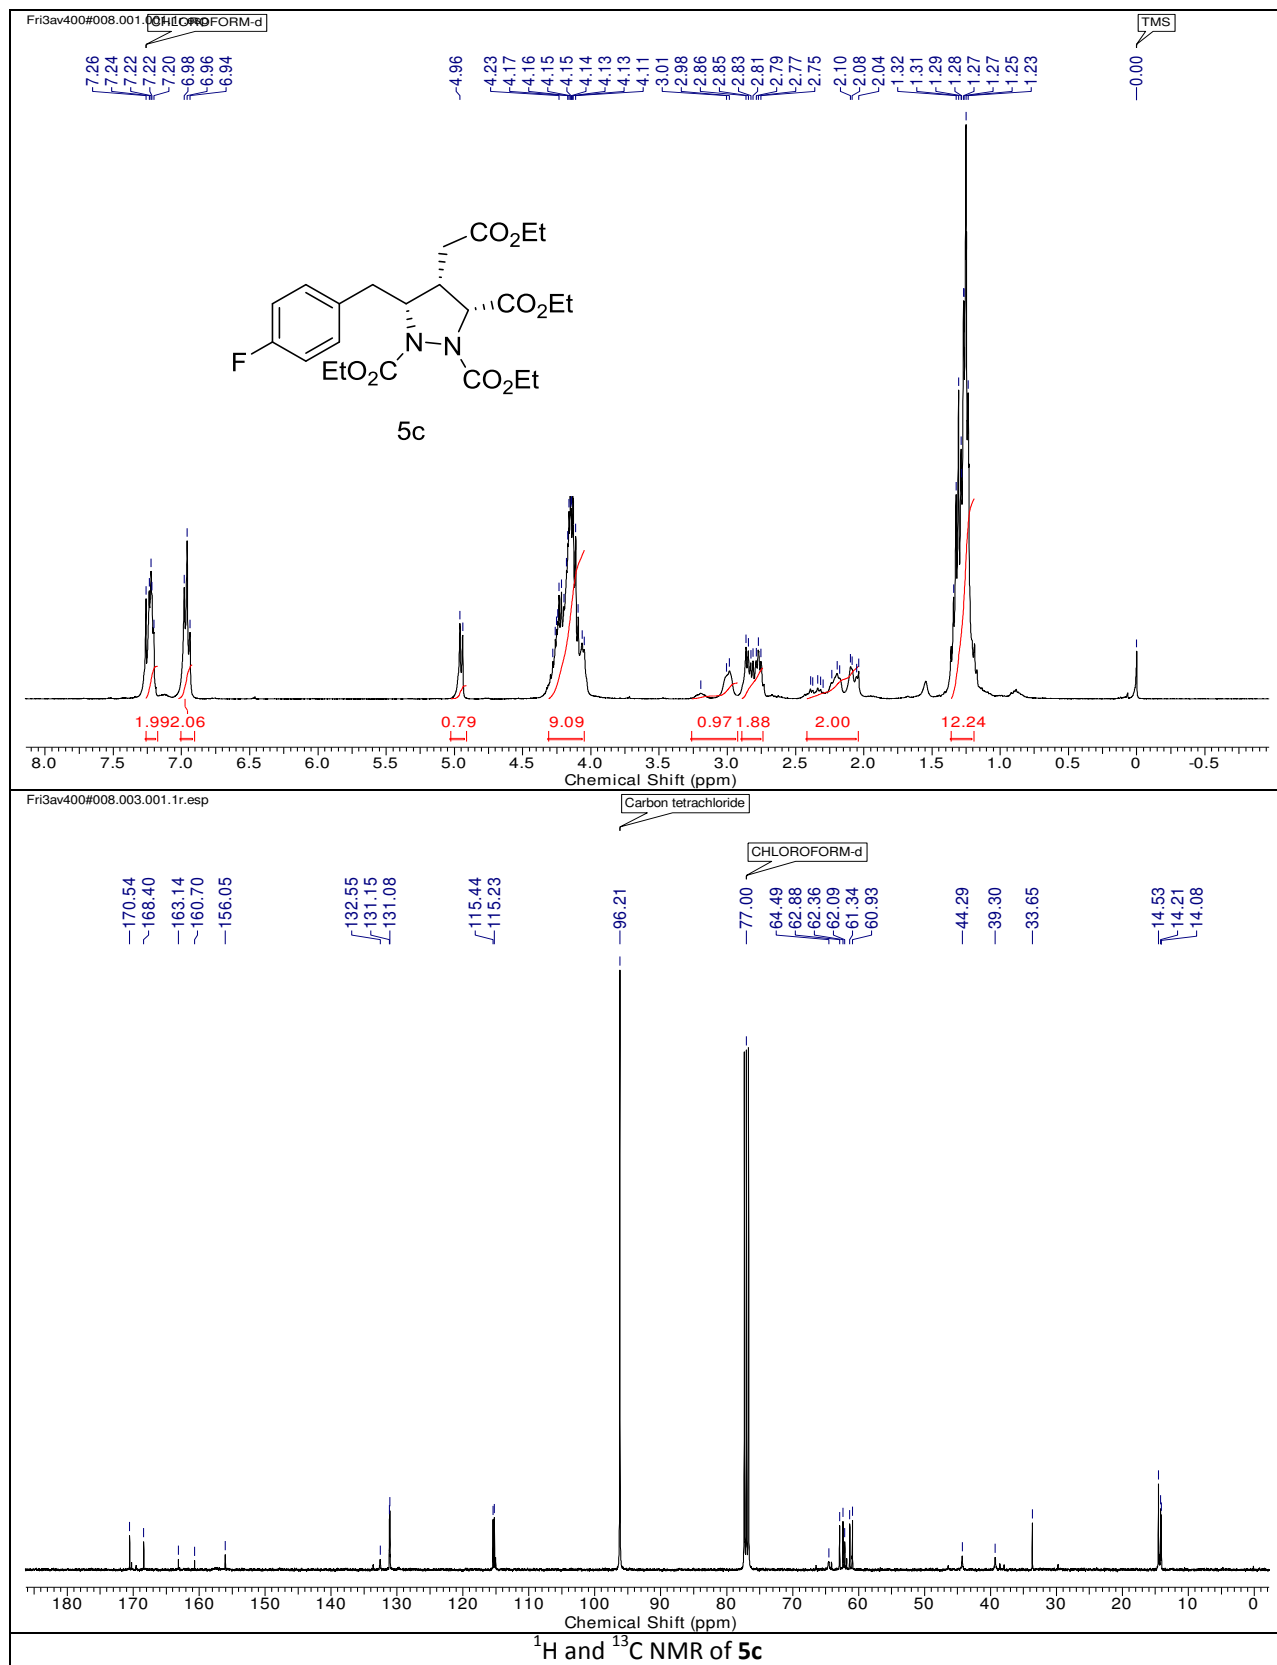

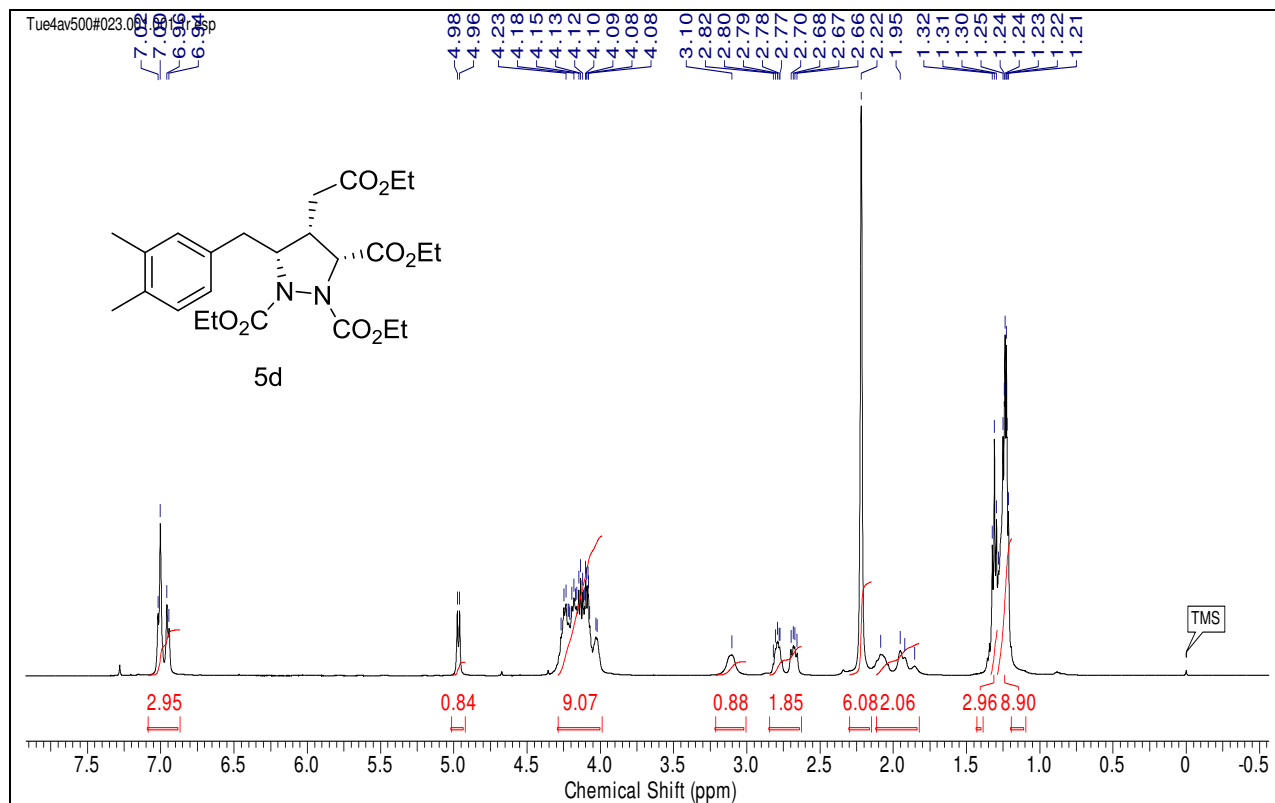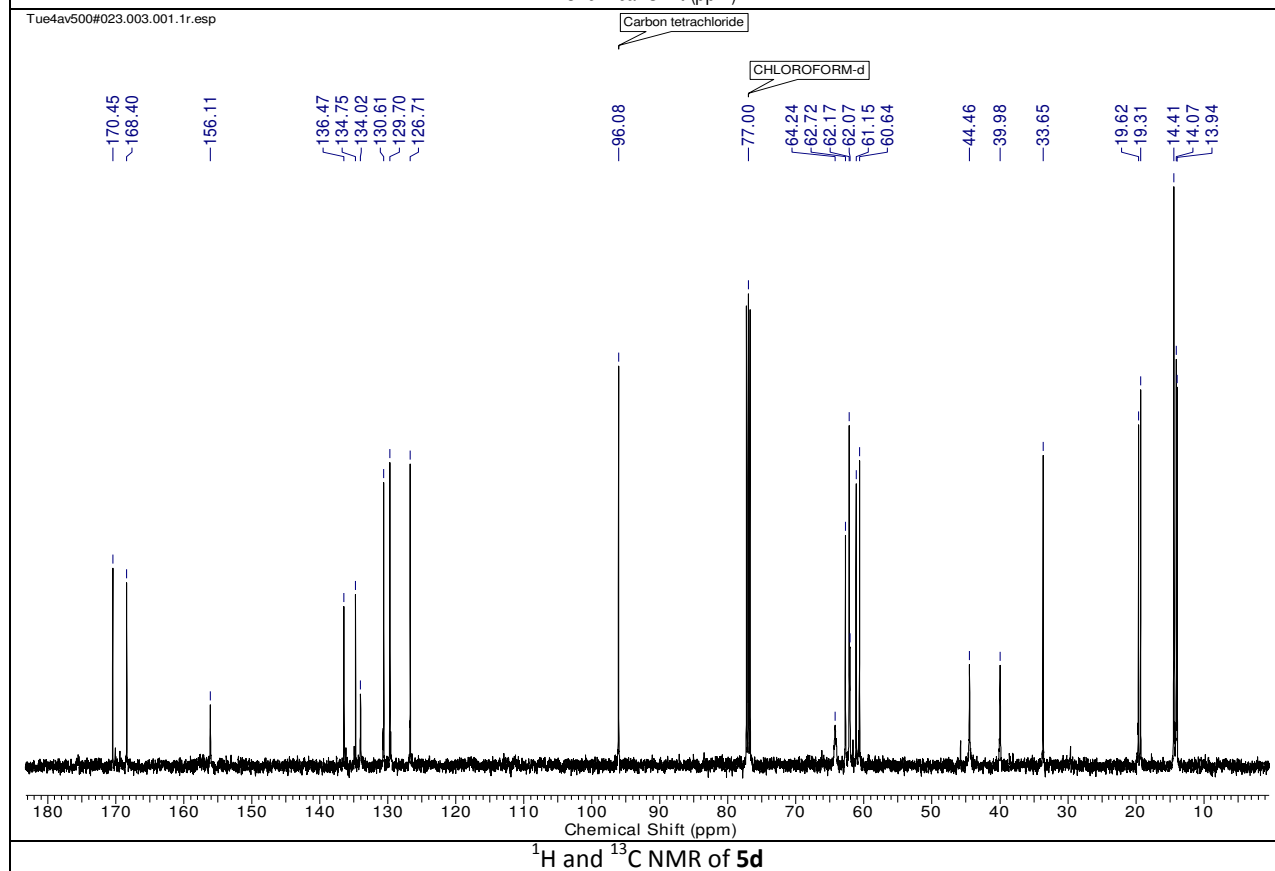

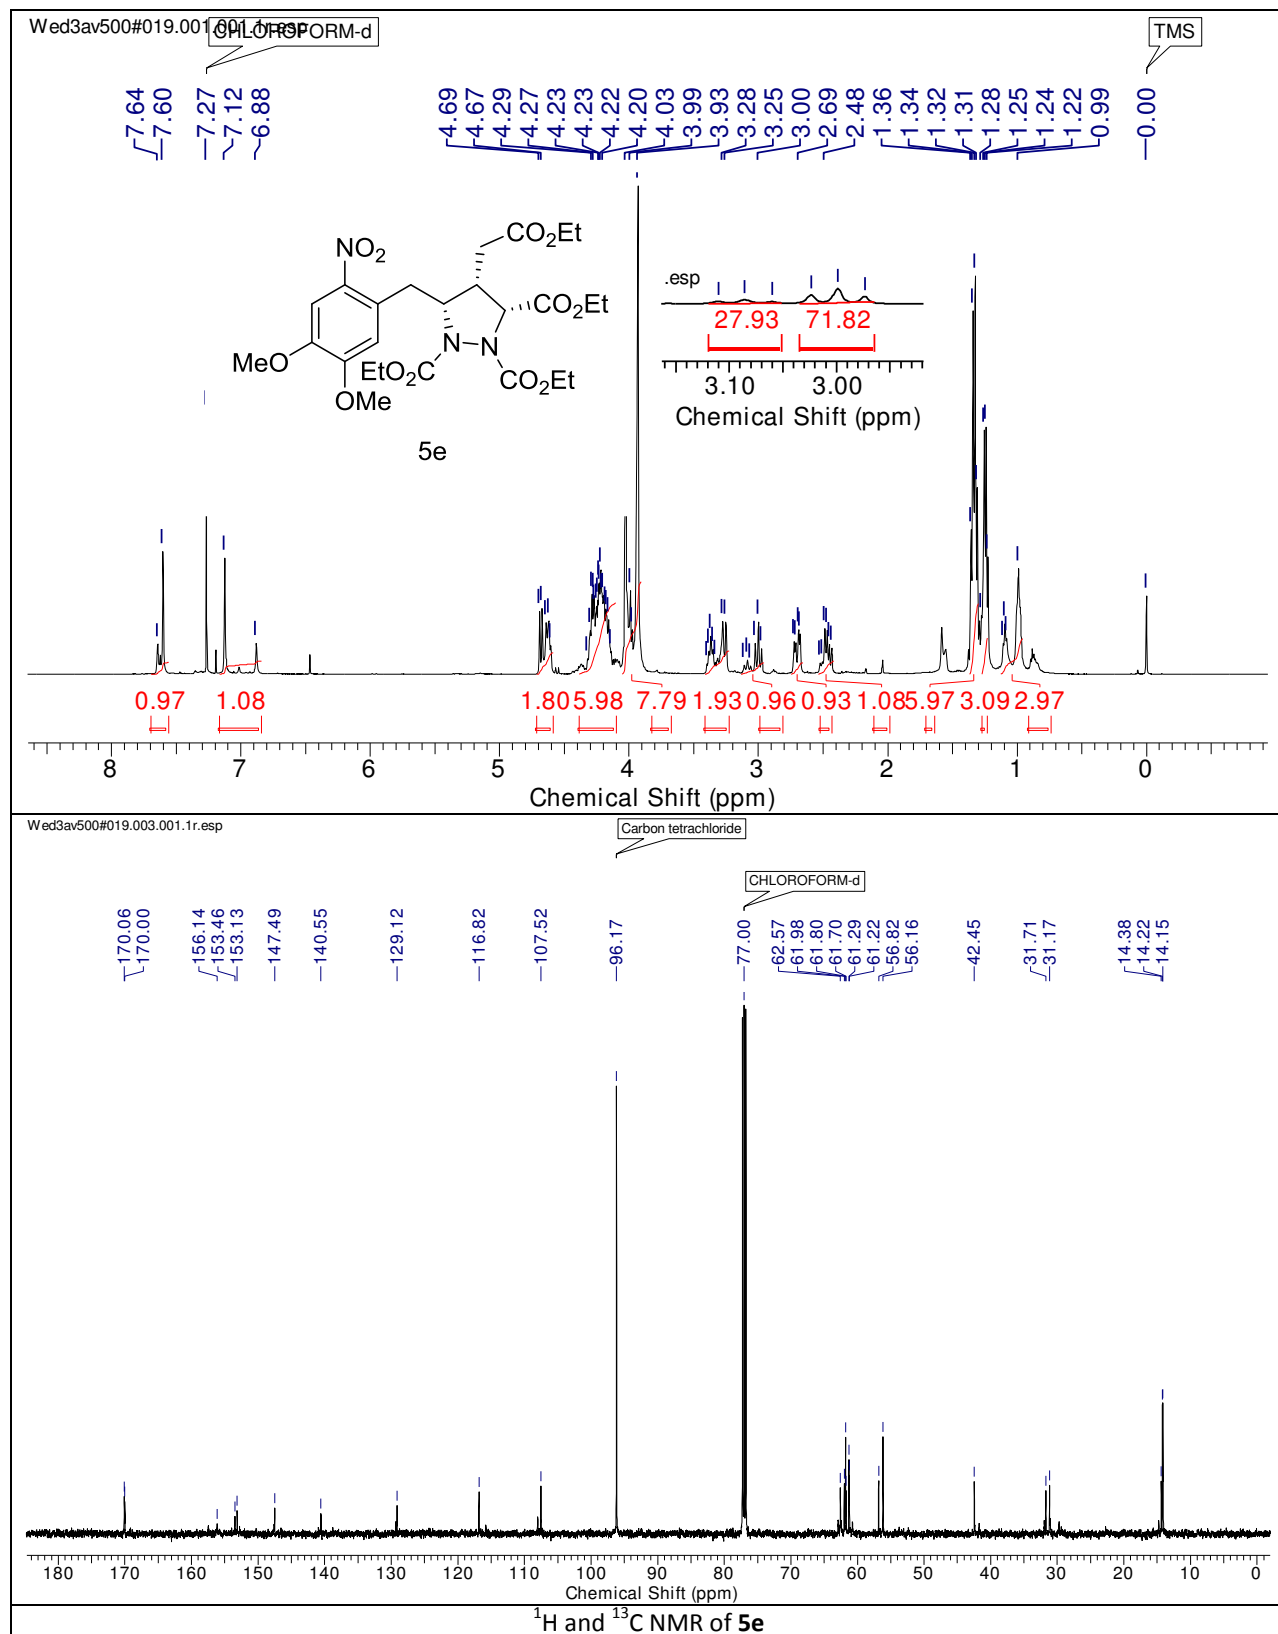

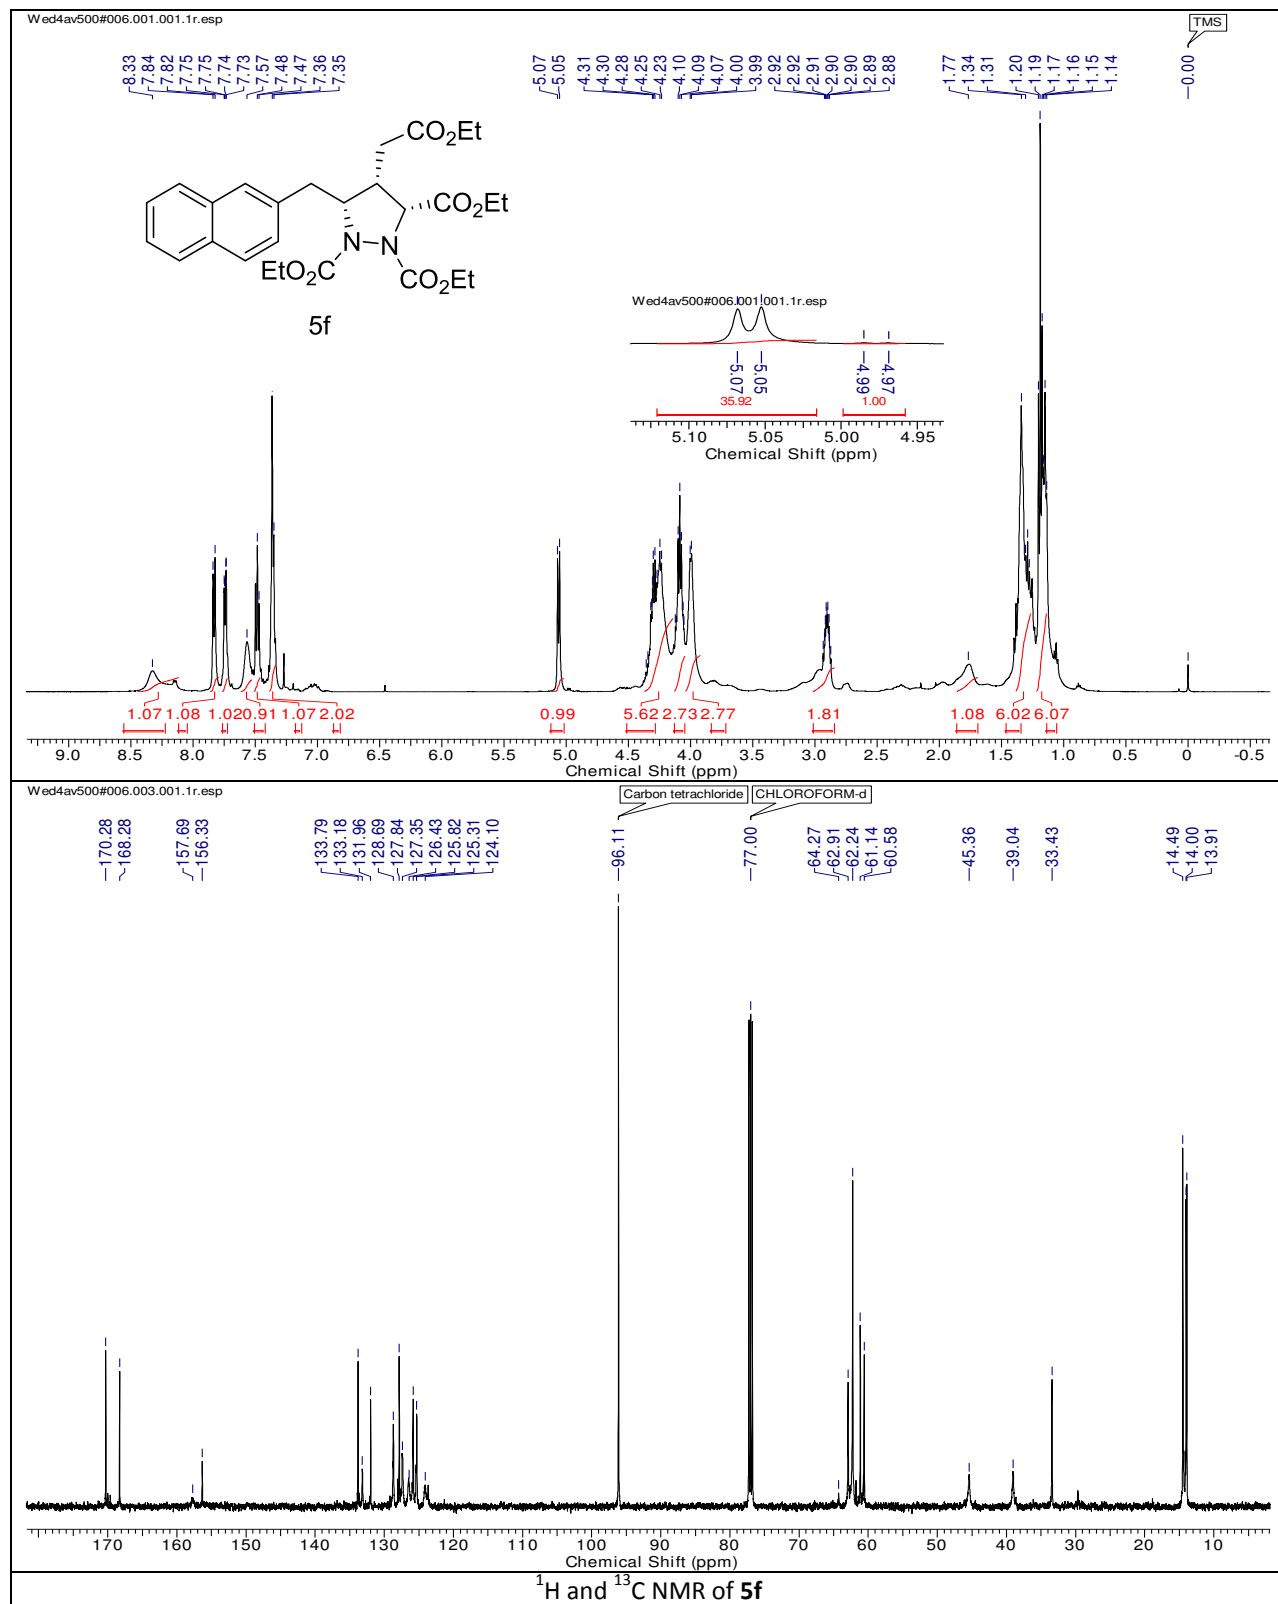

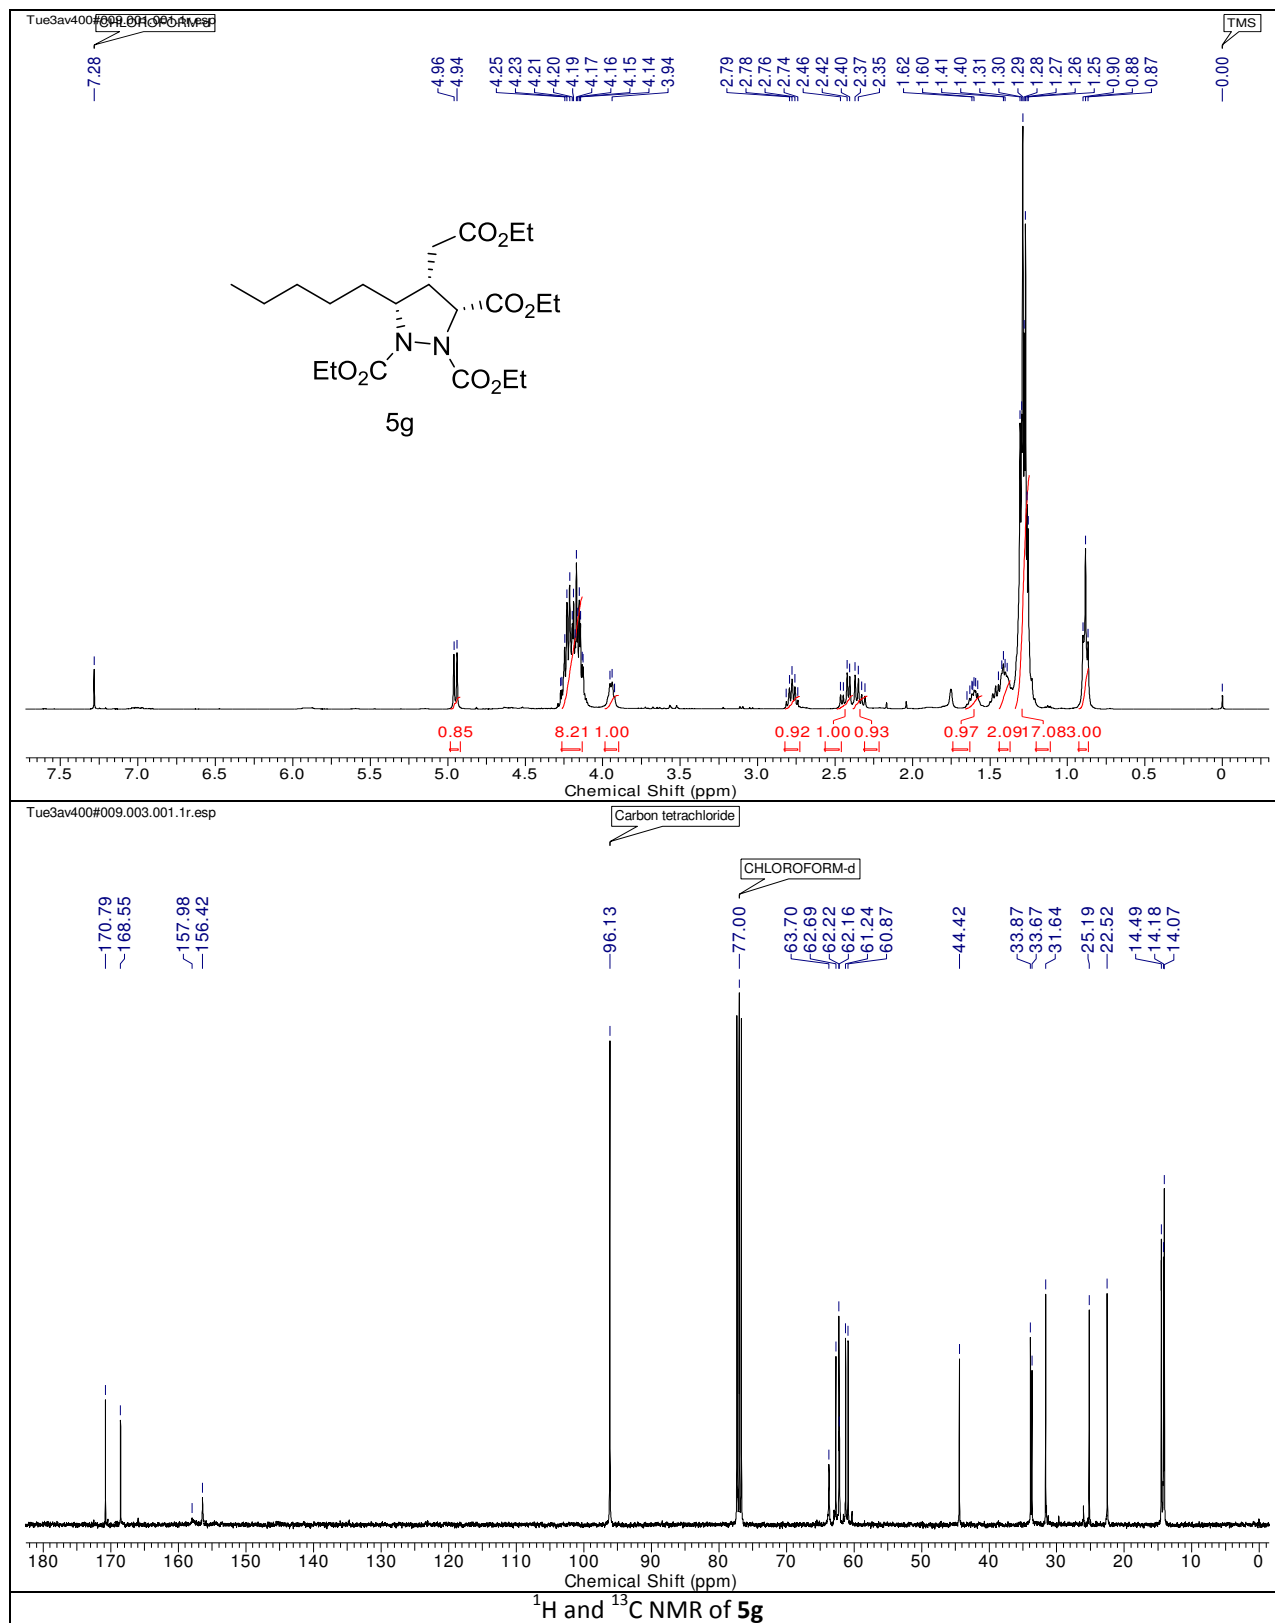



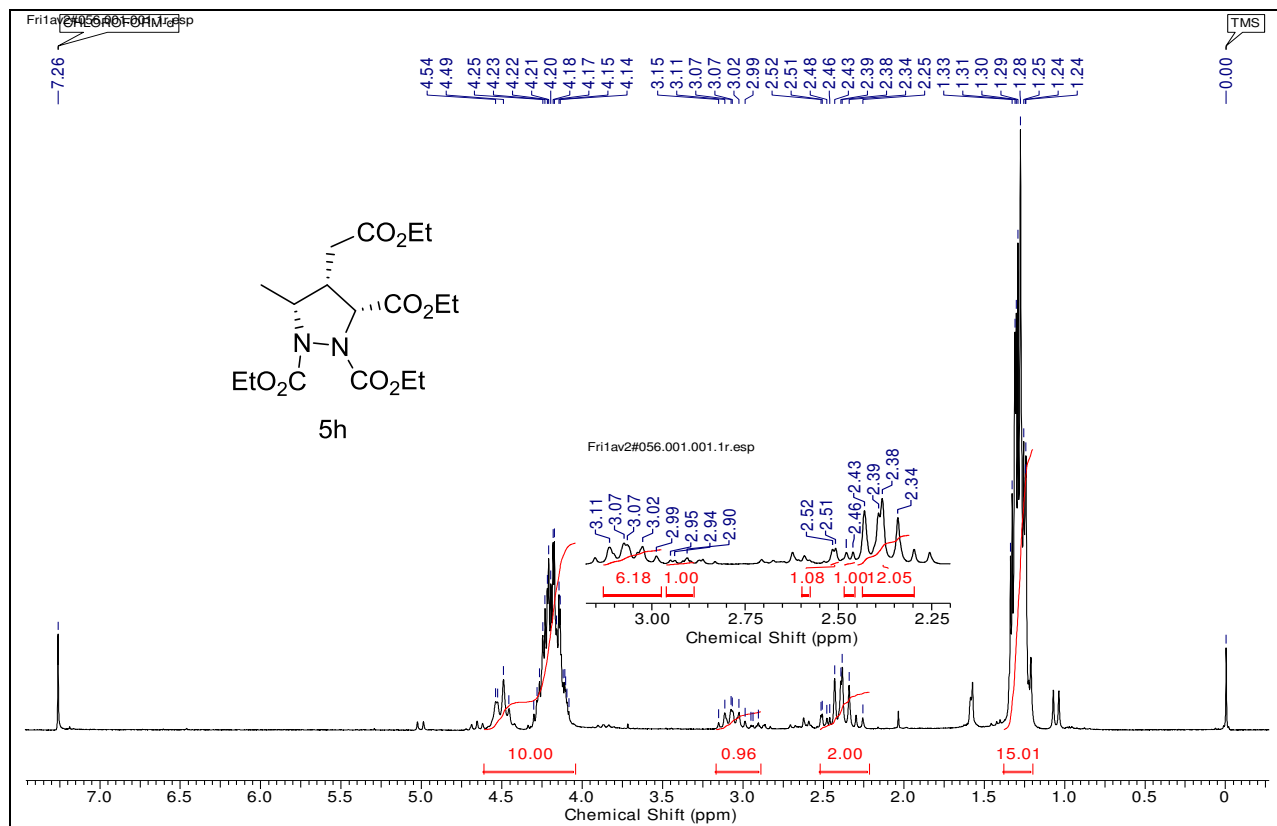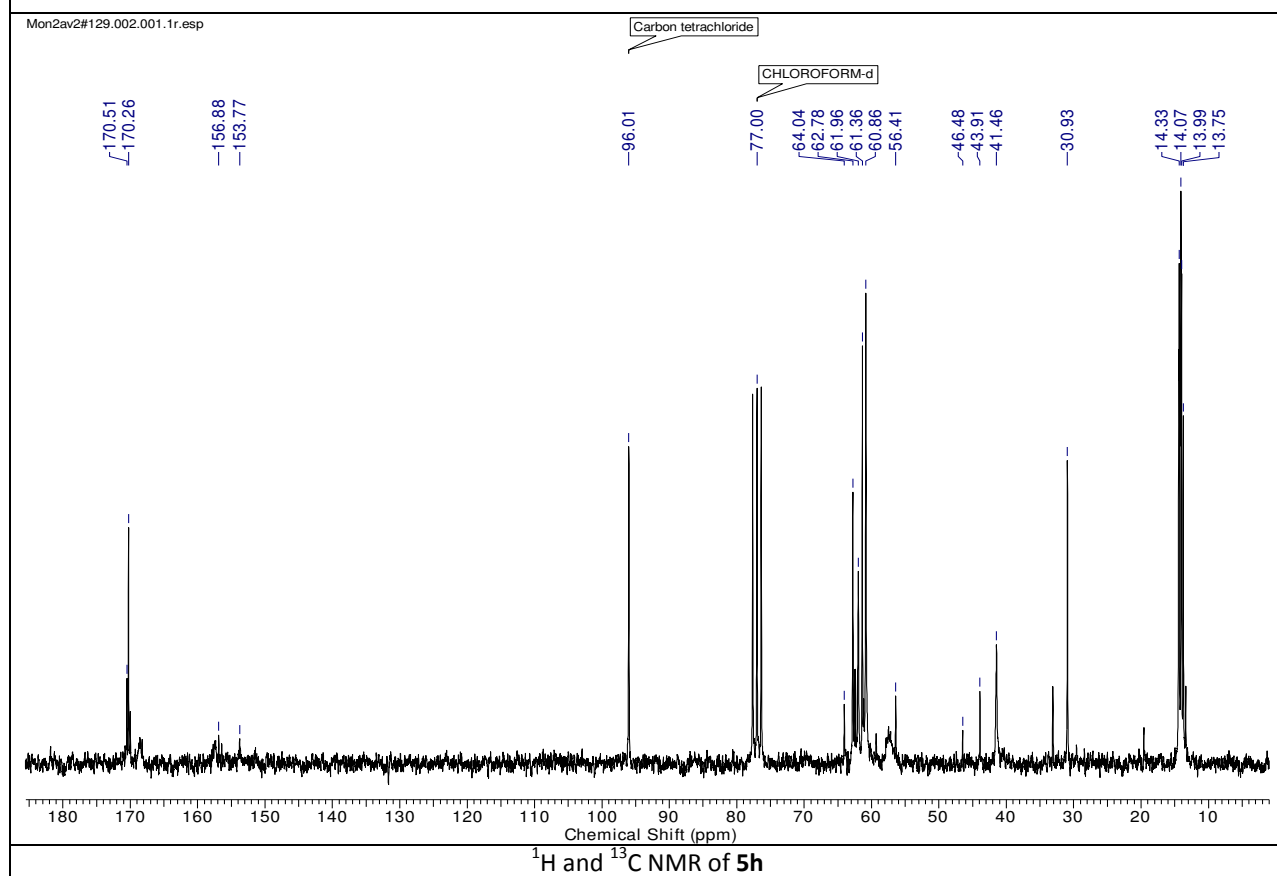

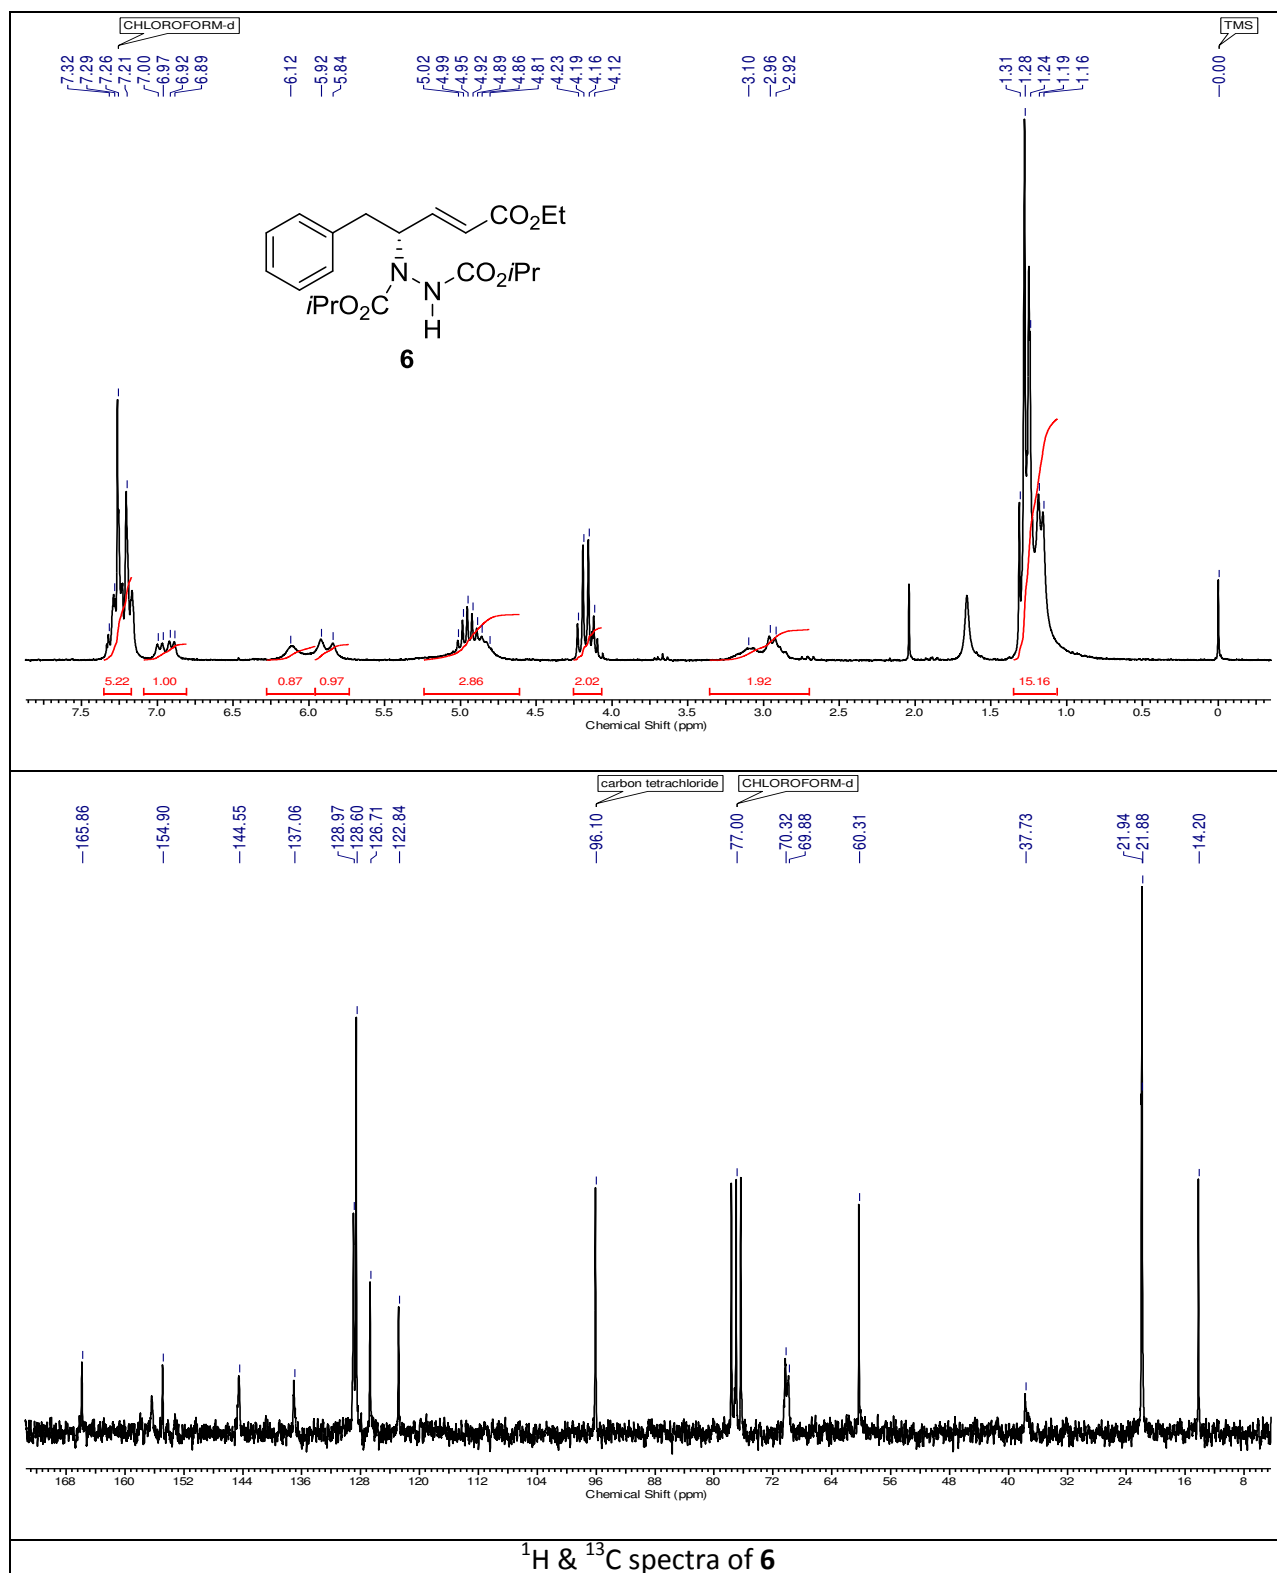

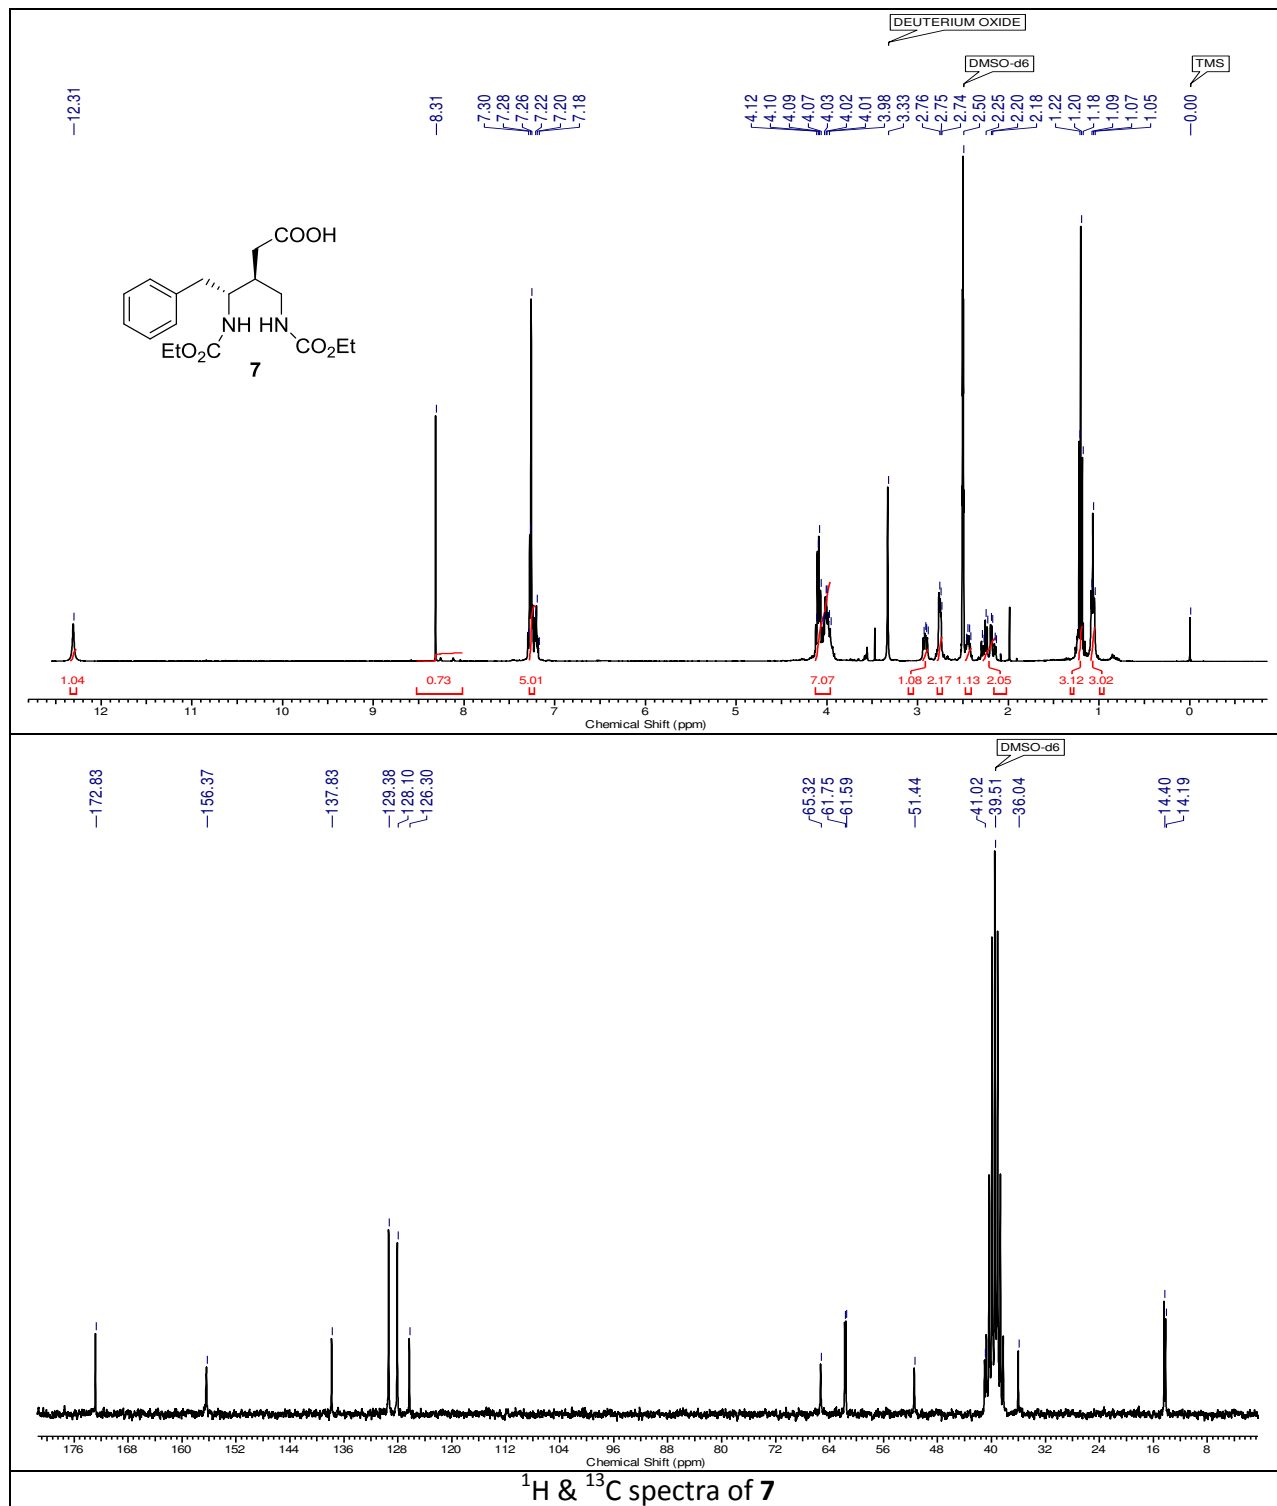

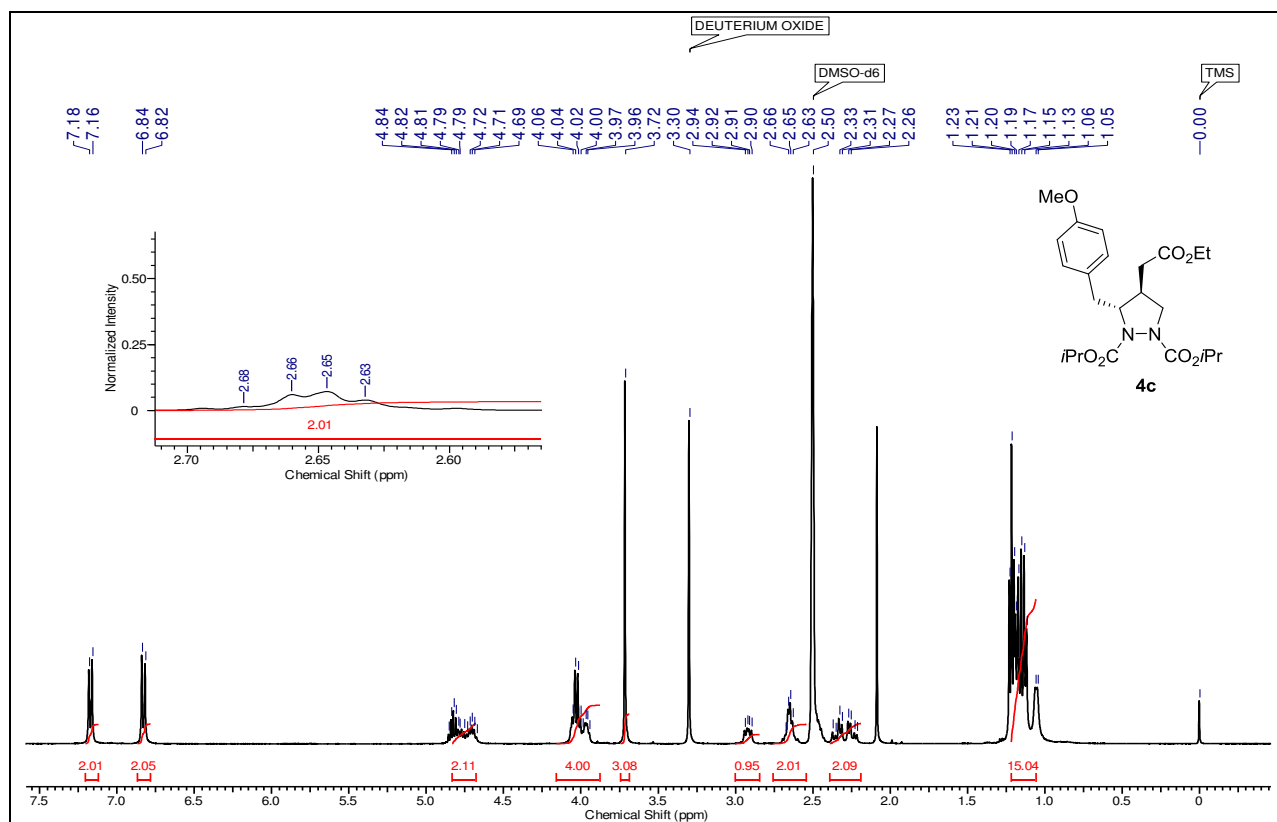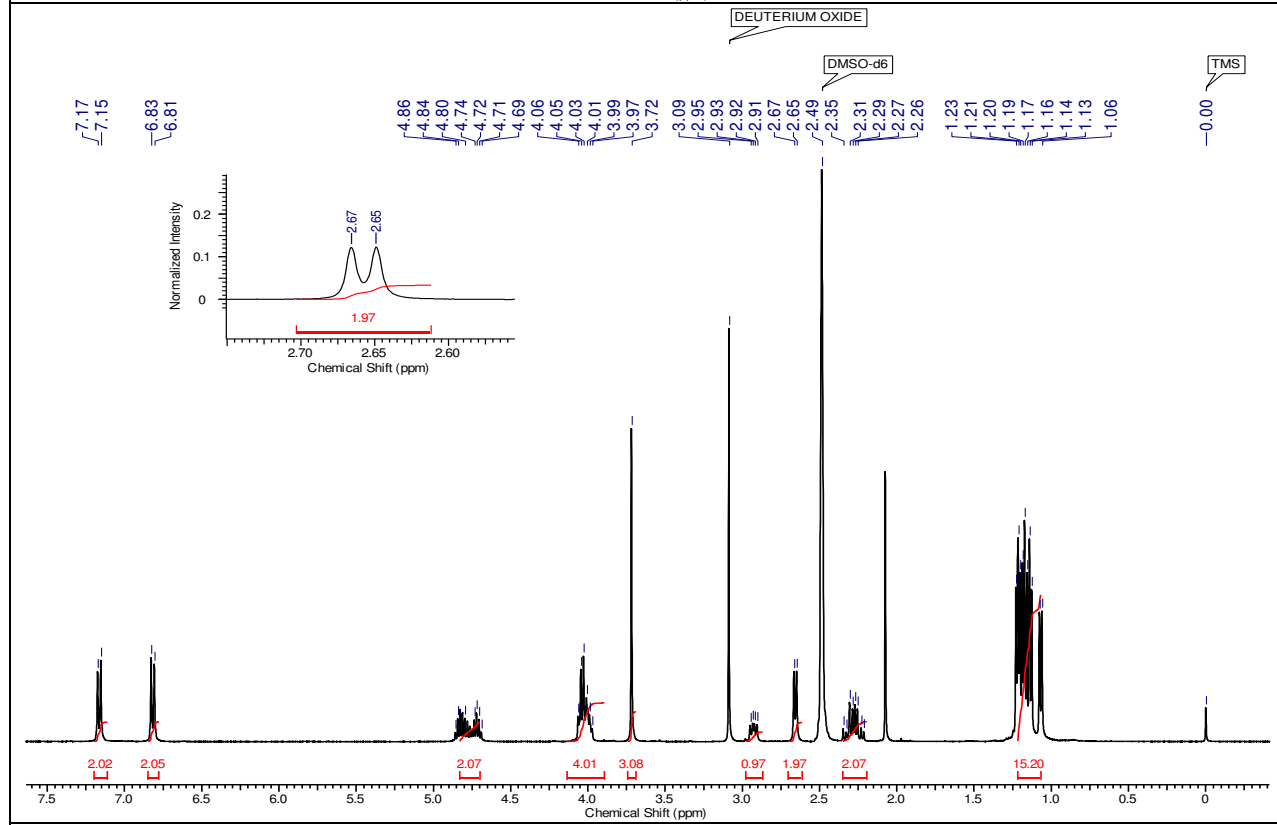

<sup>1</sup>H NMR spectra of **4c** in DMSO-d<sub>6</sub> at 27 °C and 70 °C

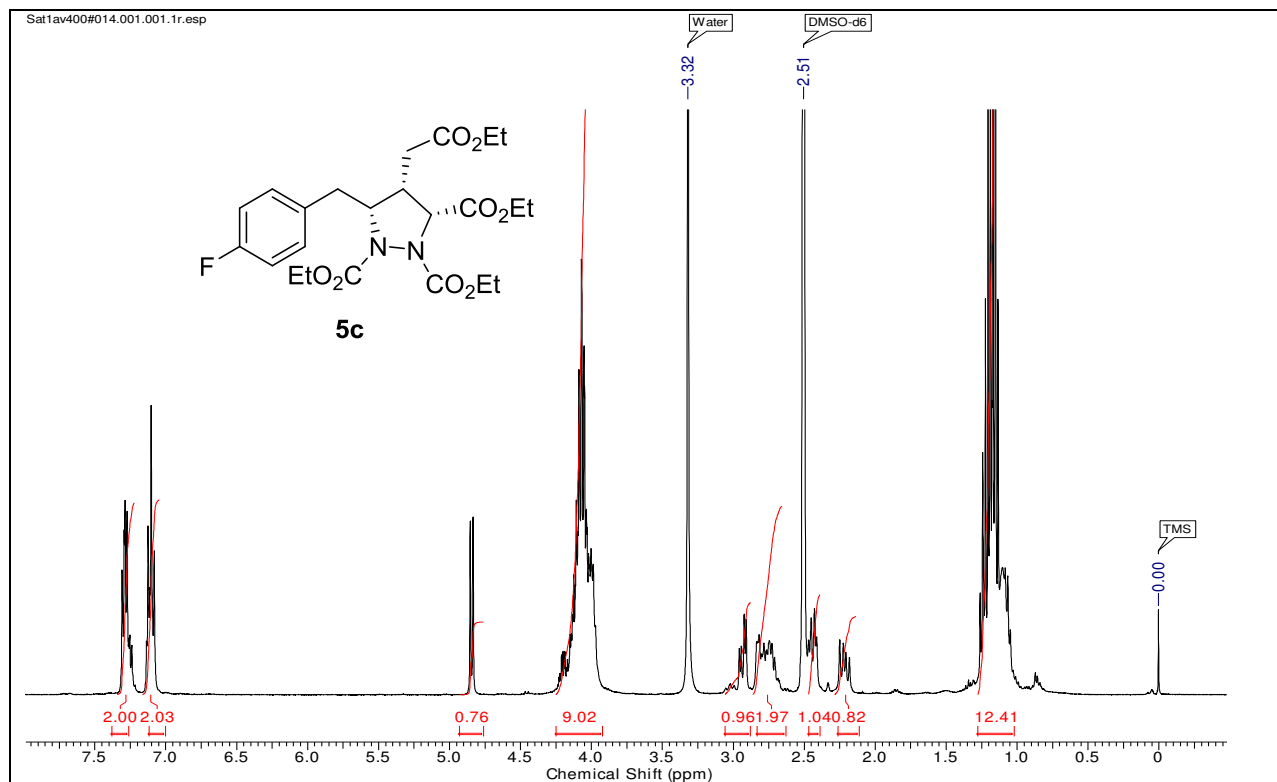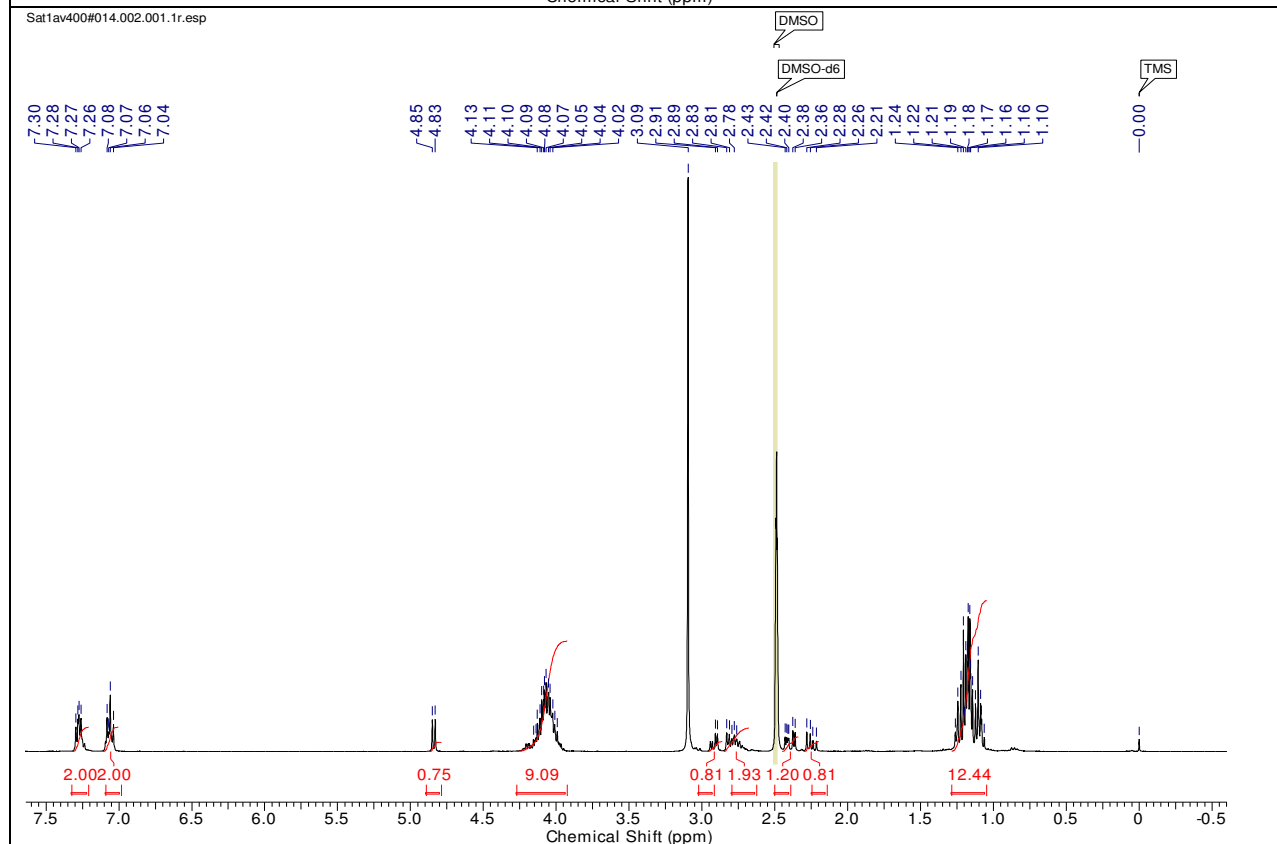

<sup>1</sup>H NMR spectra of **5c** in DMSO-d<sub>6</sub> at 27 °C and 70 °C respectively

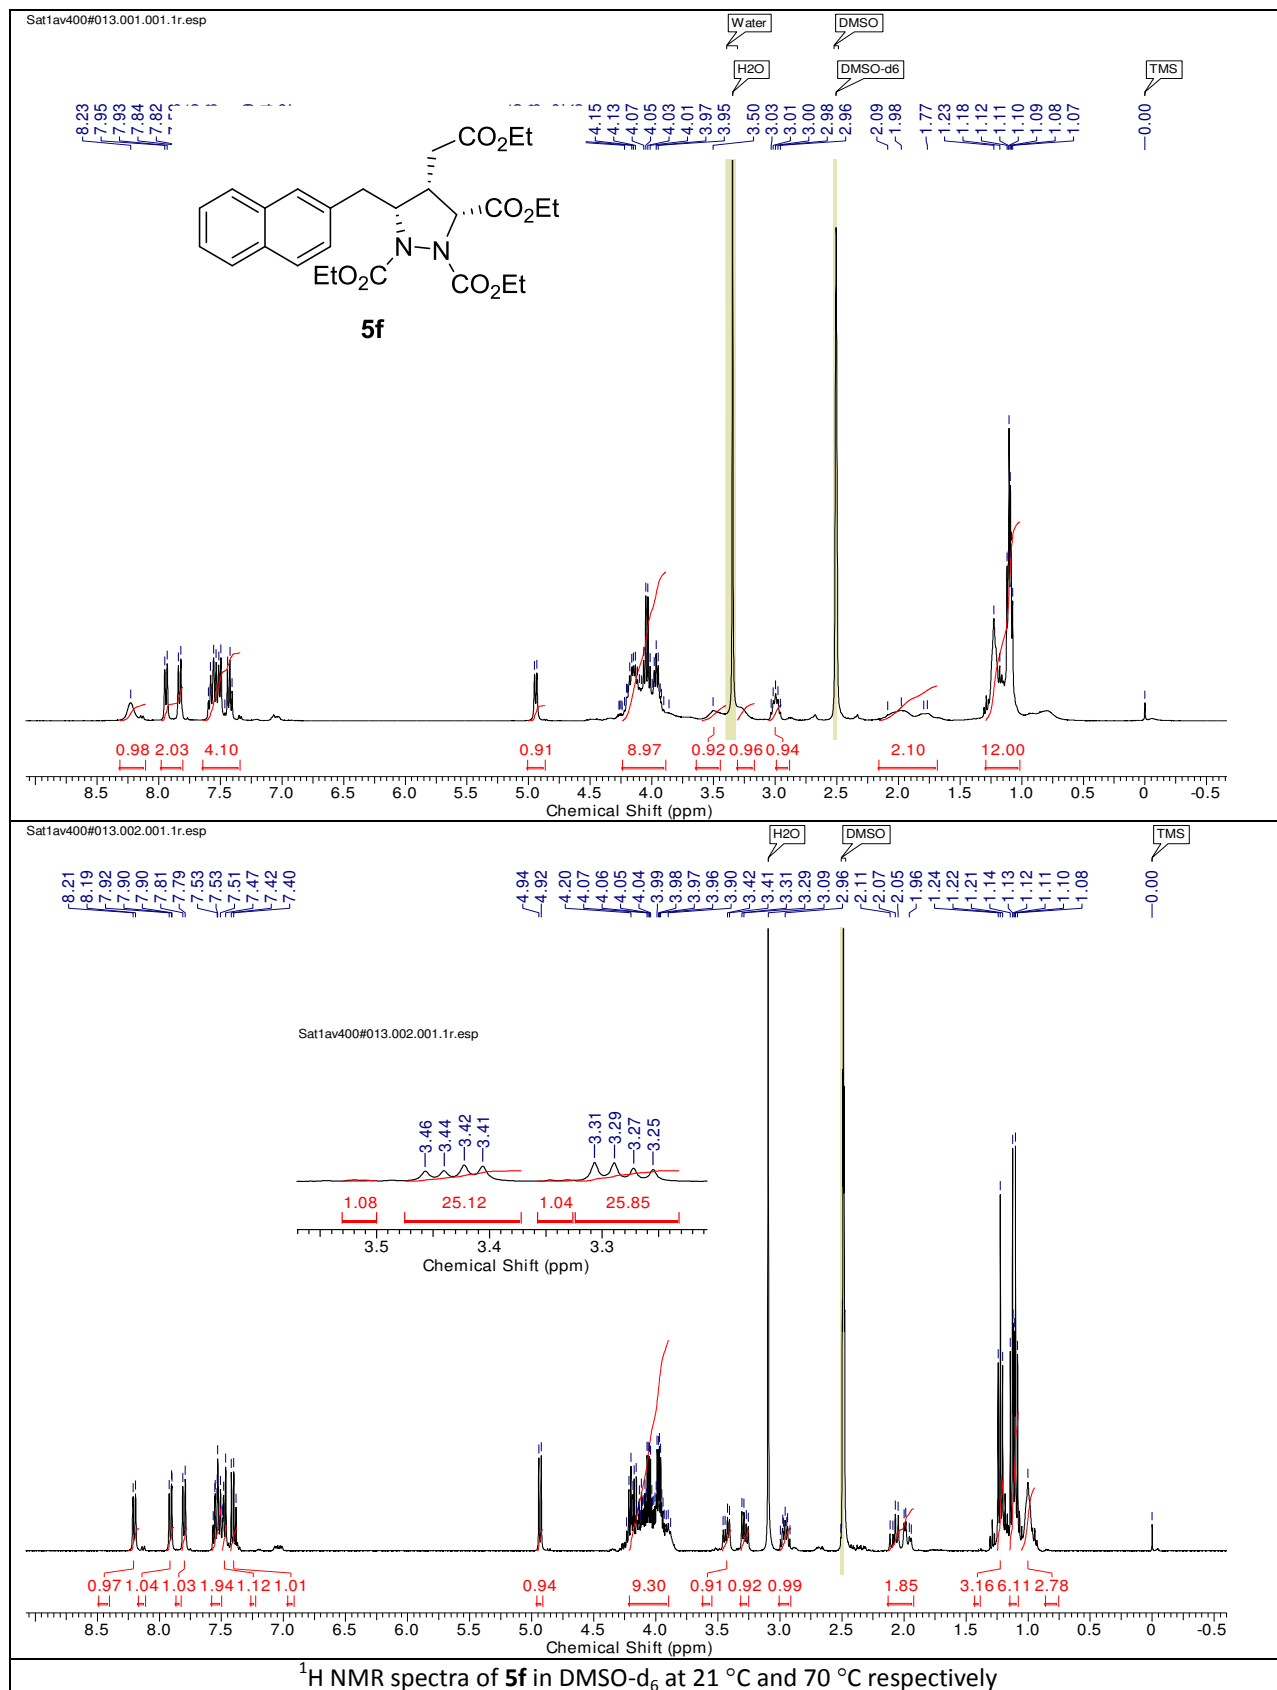

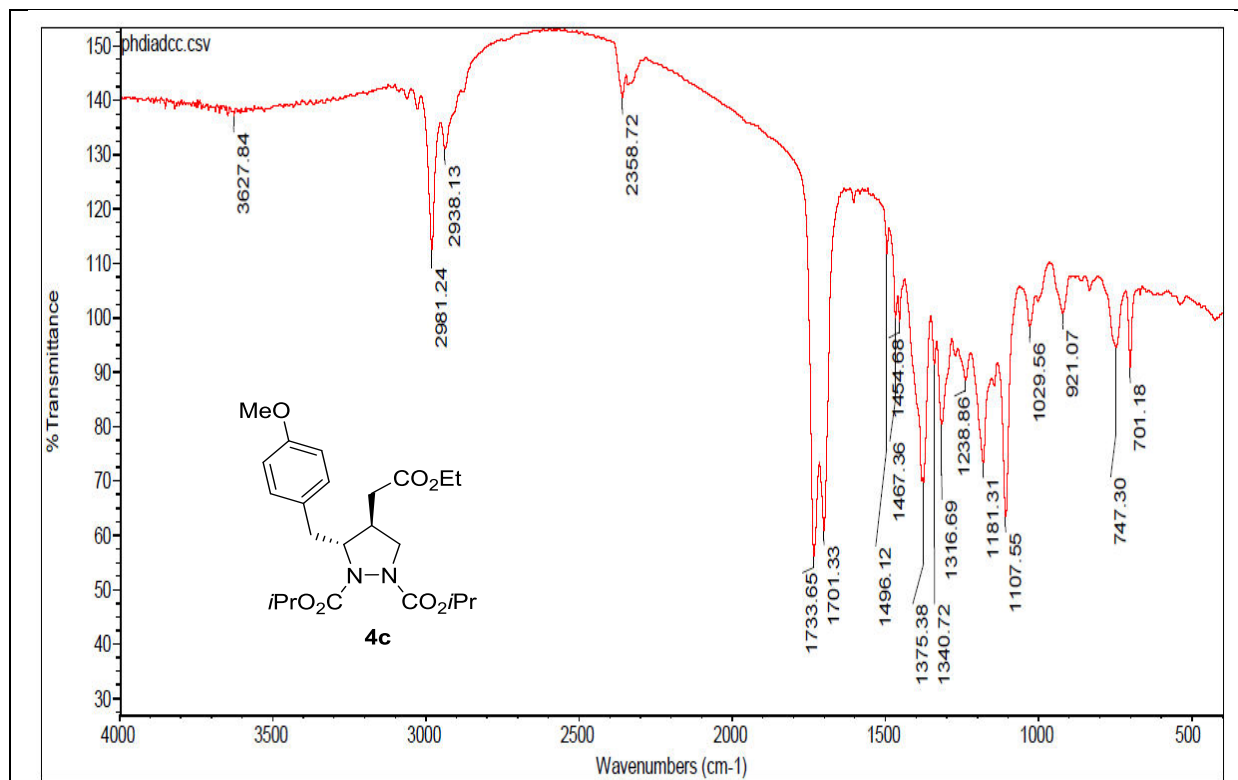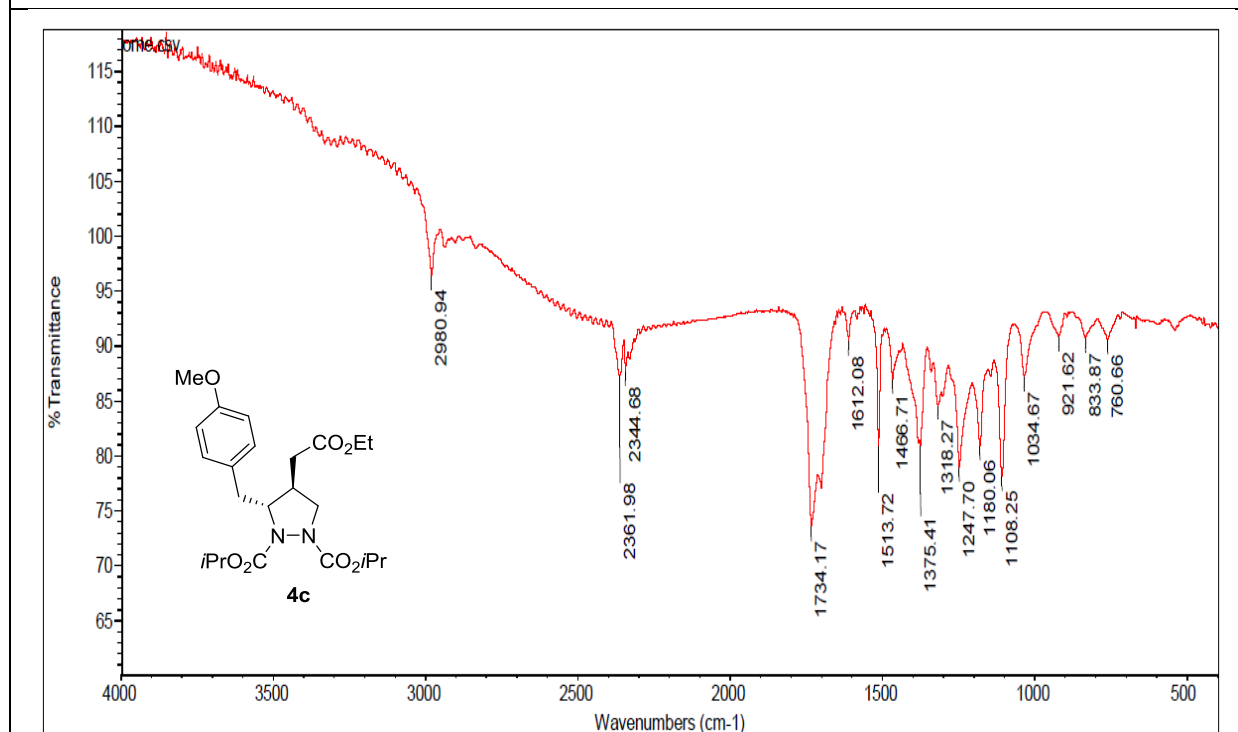

IR spectrum of **4a** ( $R' = iPr$ ) and **4c**

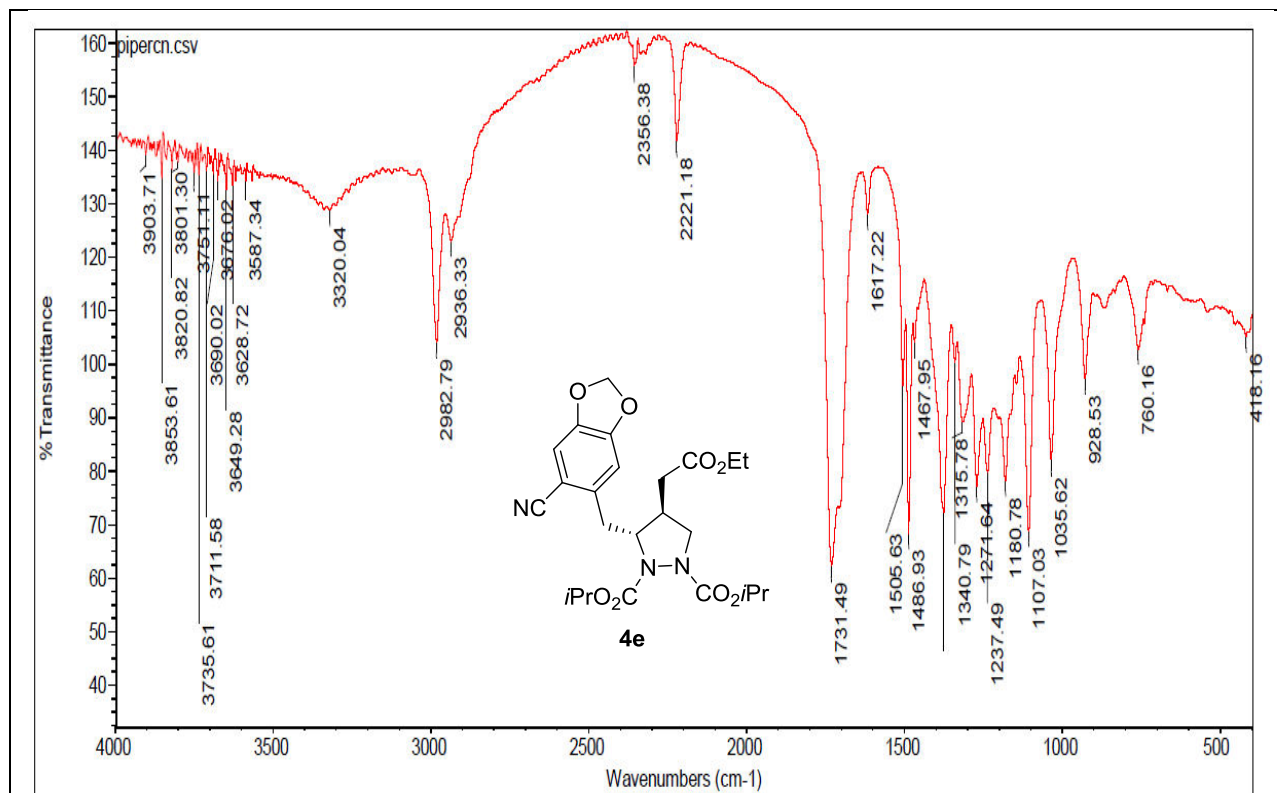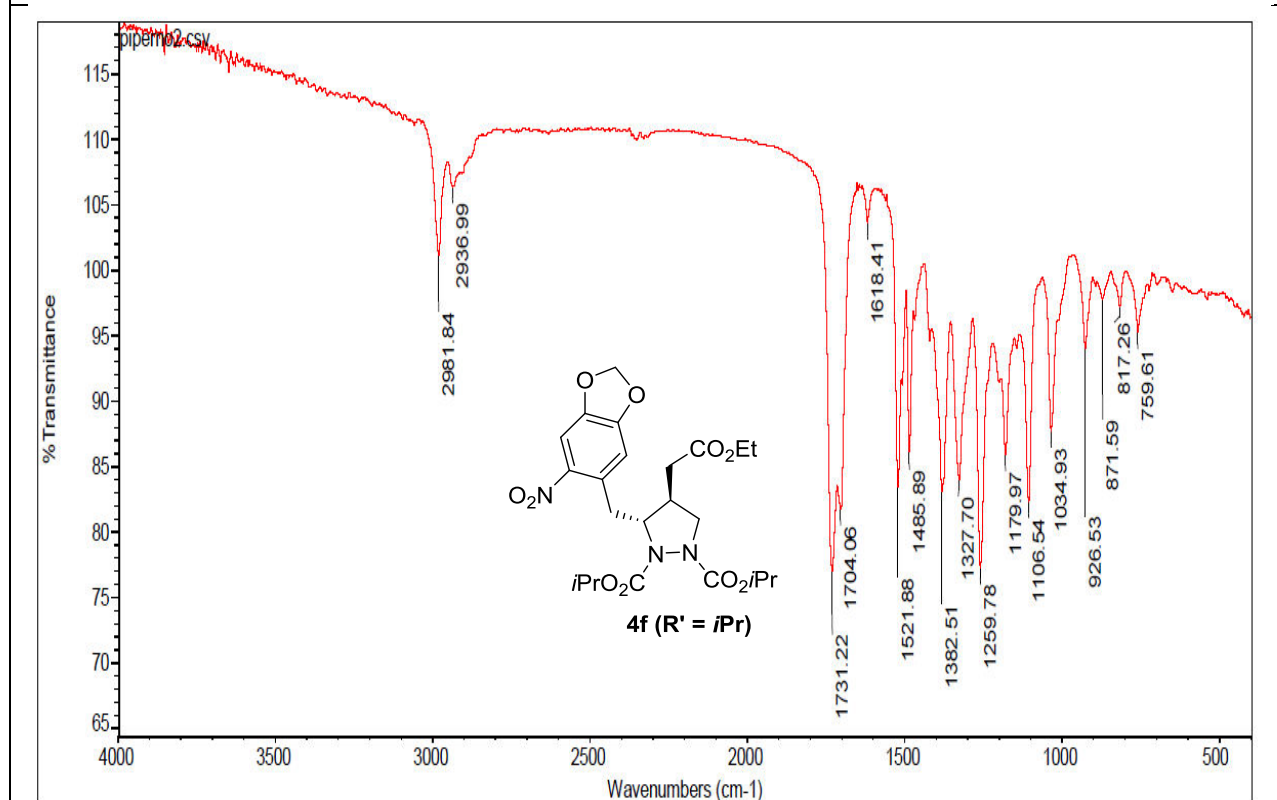

IR spectrum of **4e** and **4f** (R' = *i*Pr)



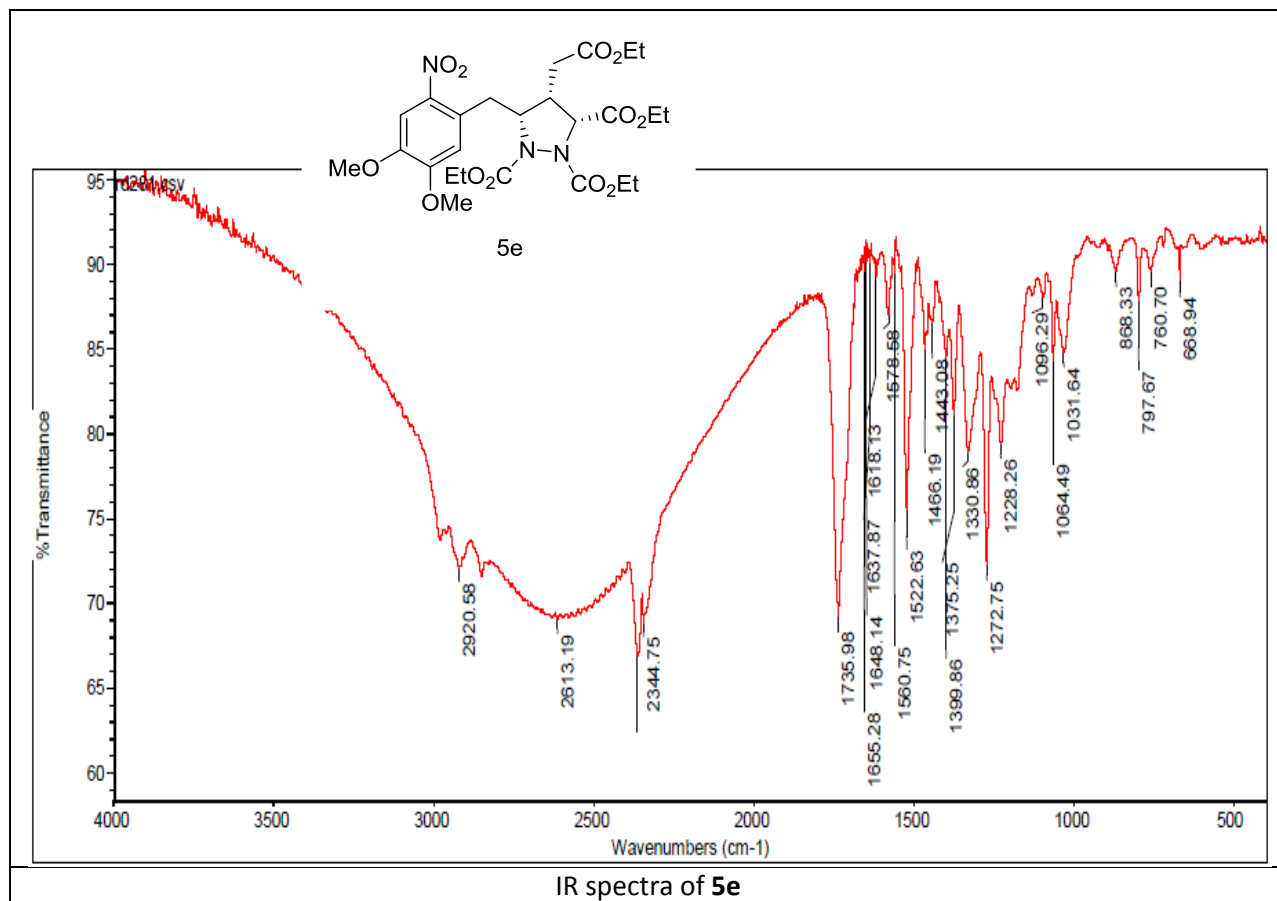

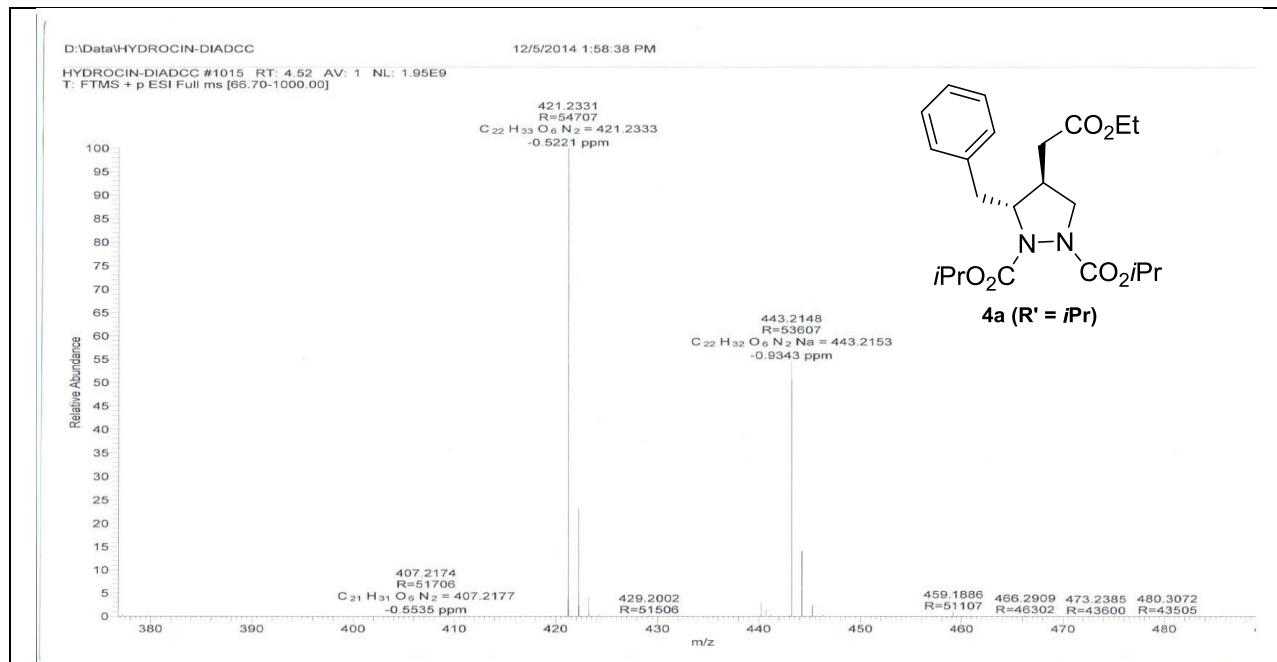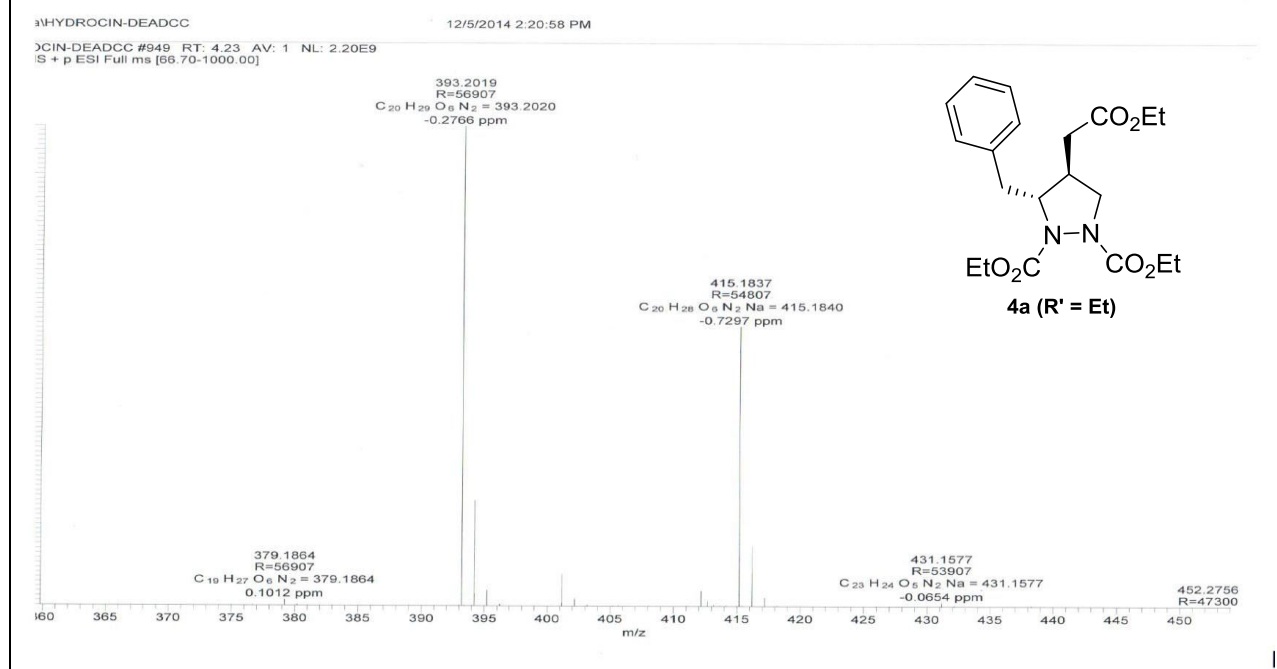

HRMS of **4a** ( R' = iPr, Et)

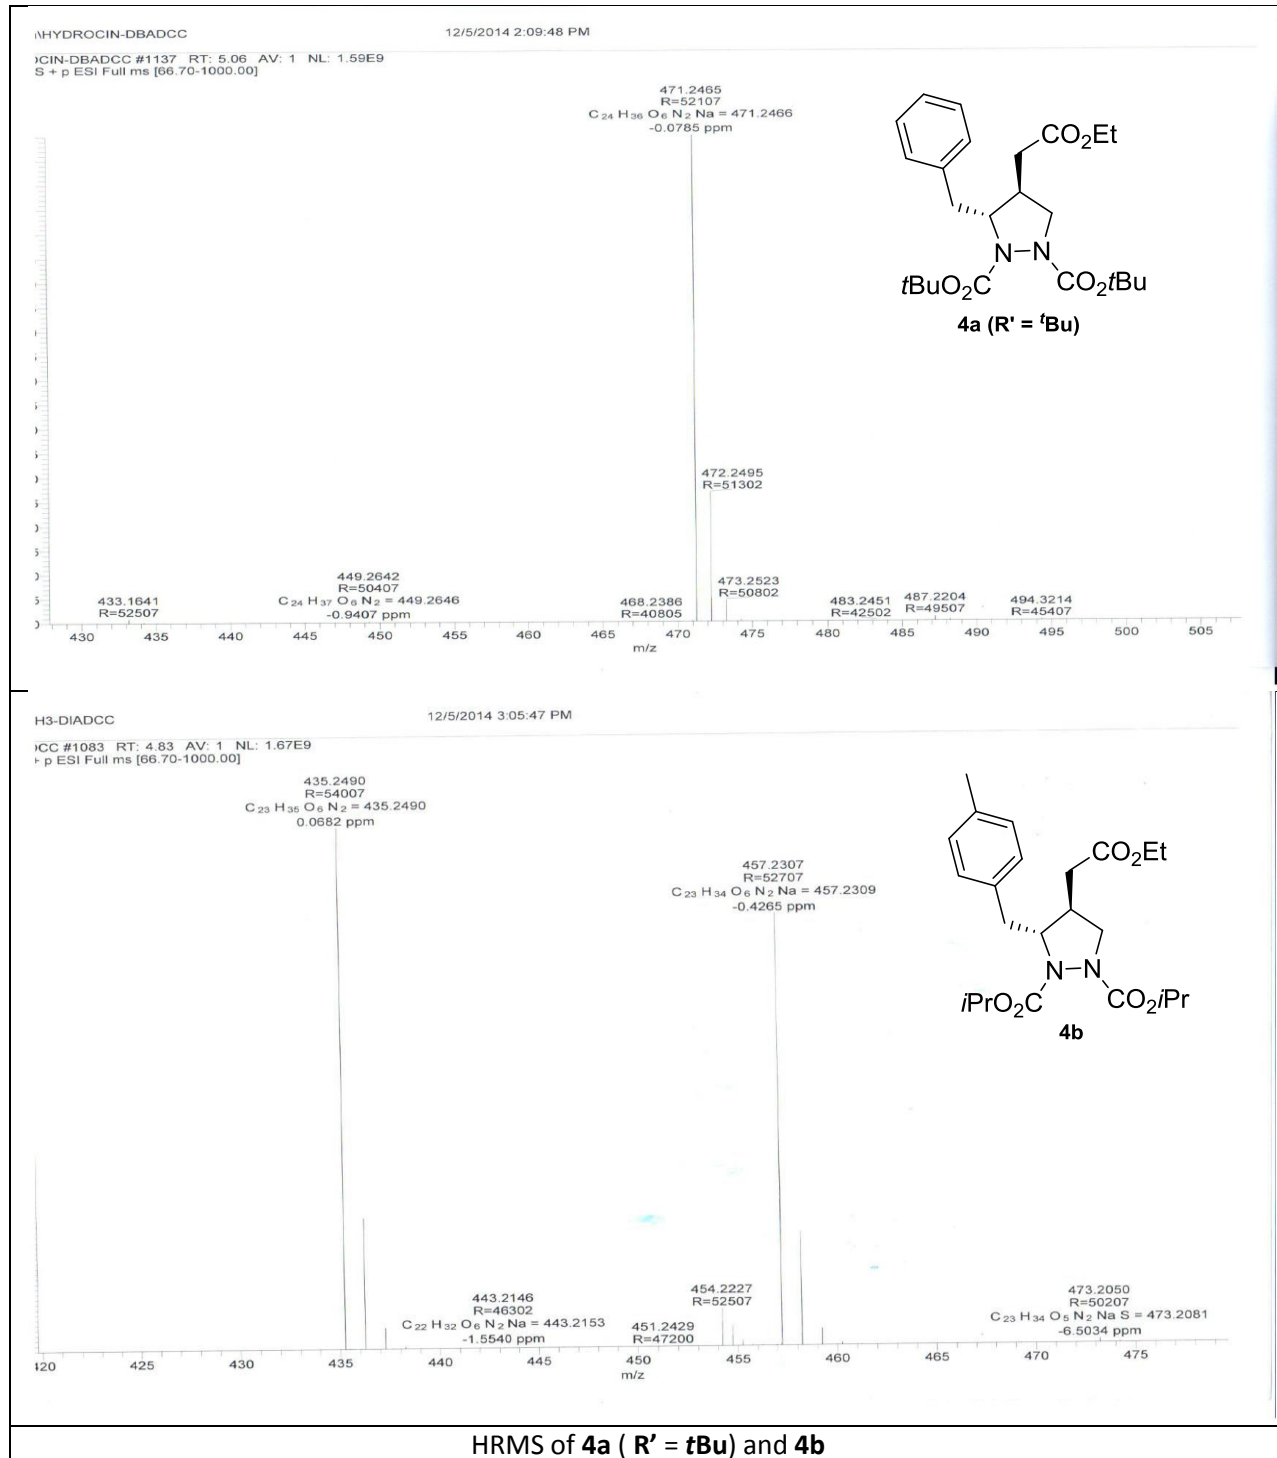

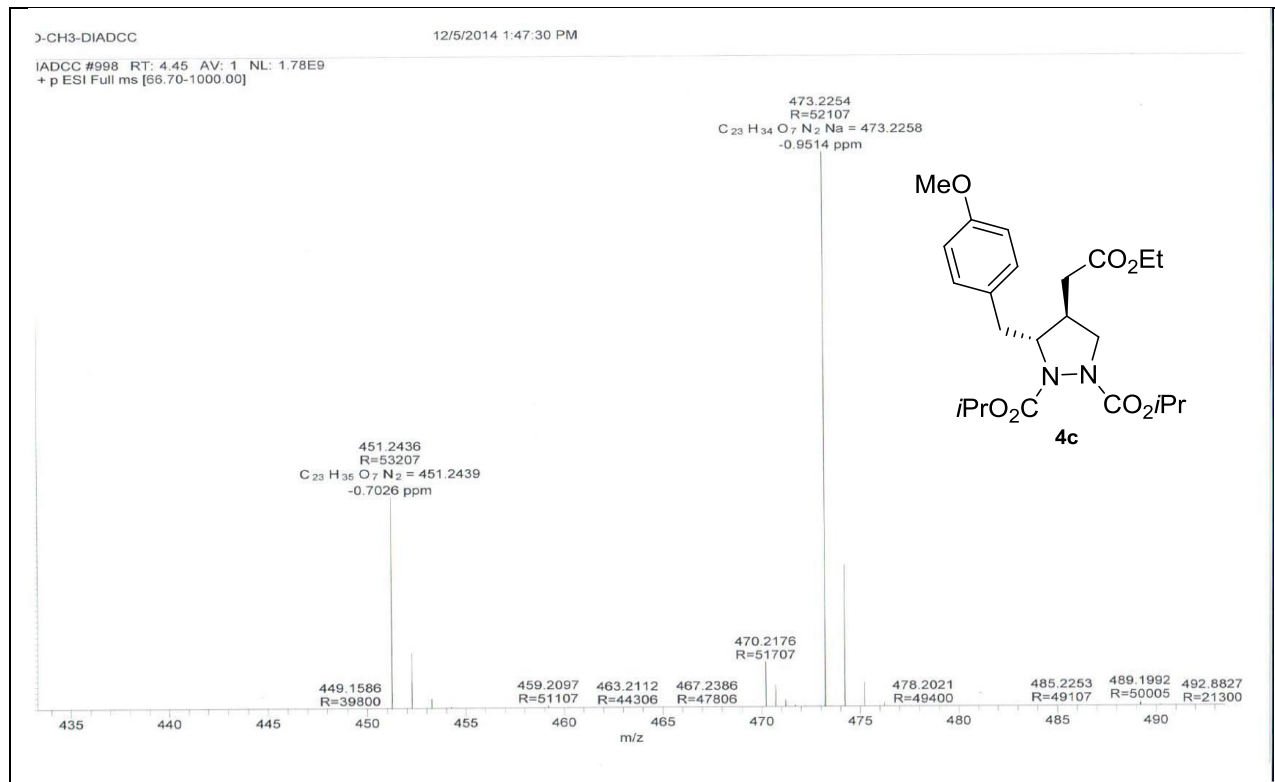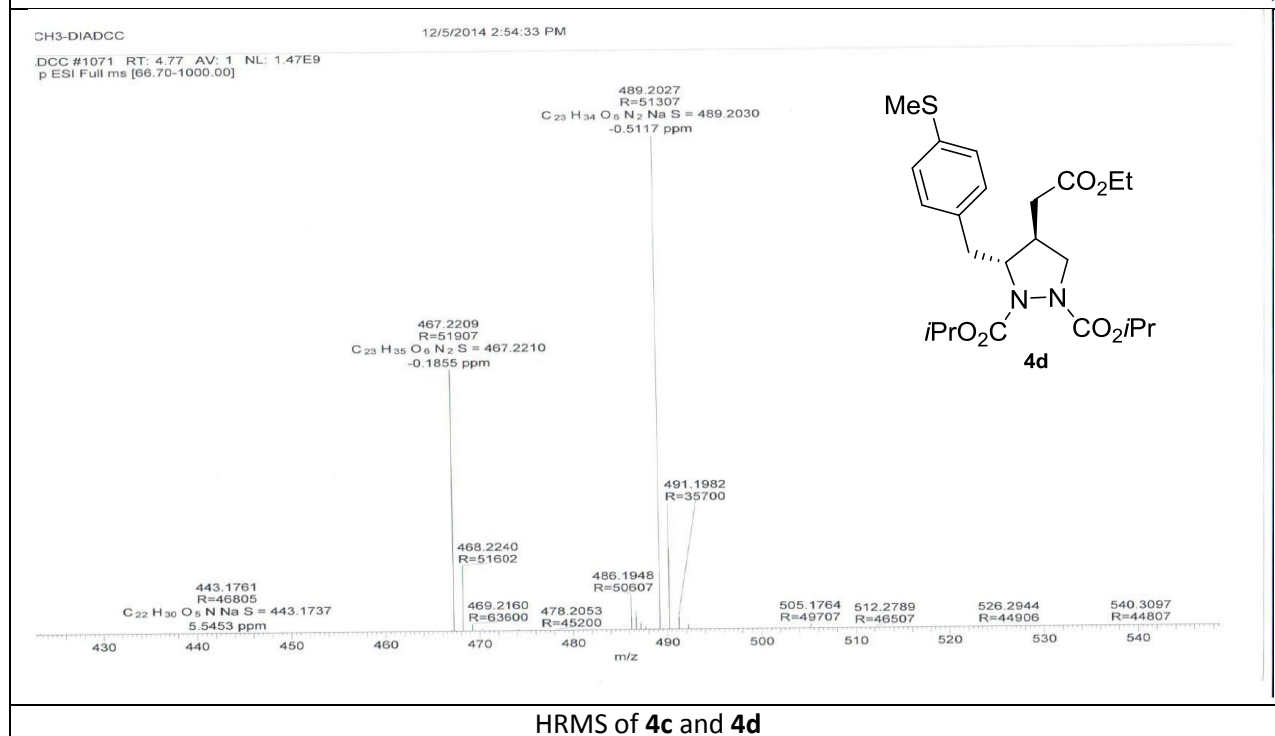

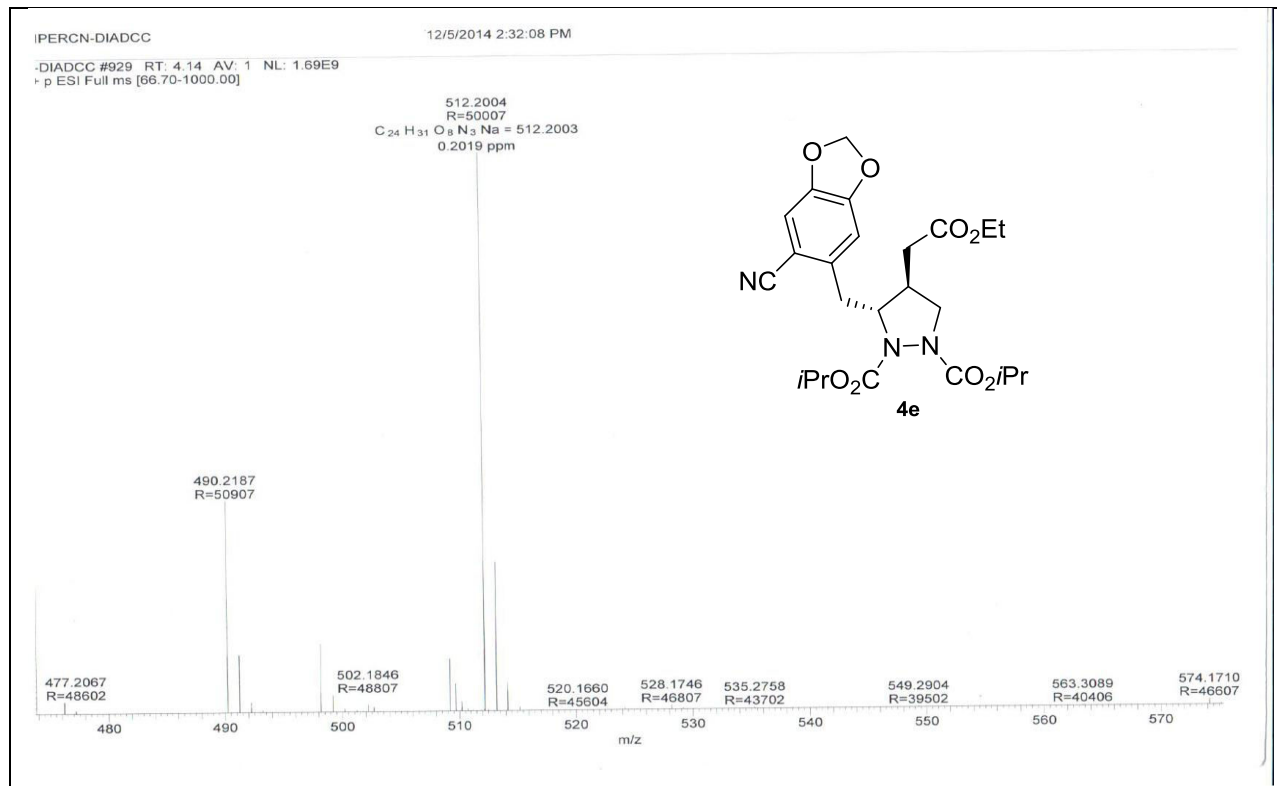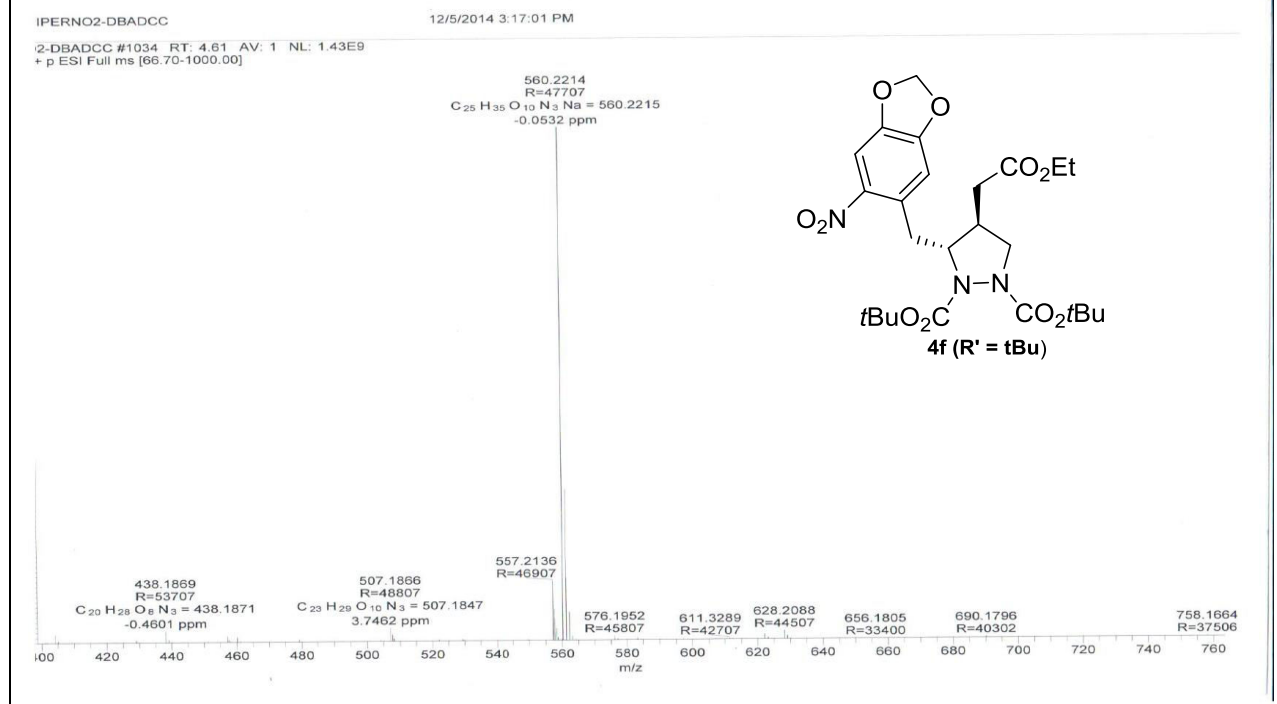

HRMS of **4e** and **4f (R' = tBu)**

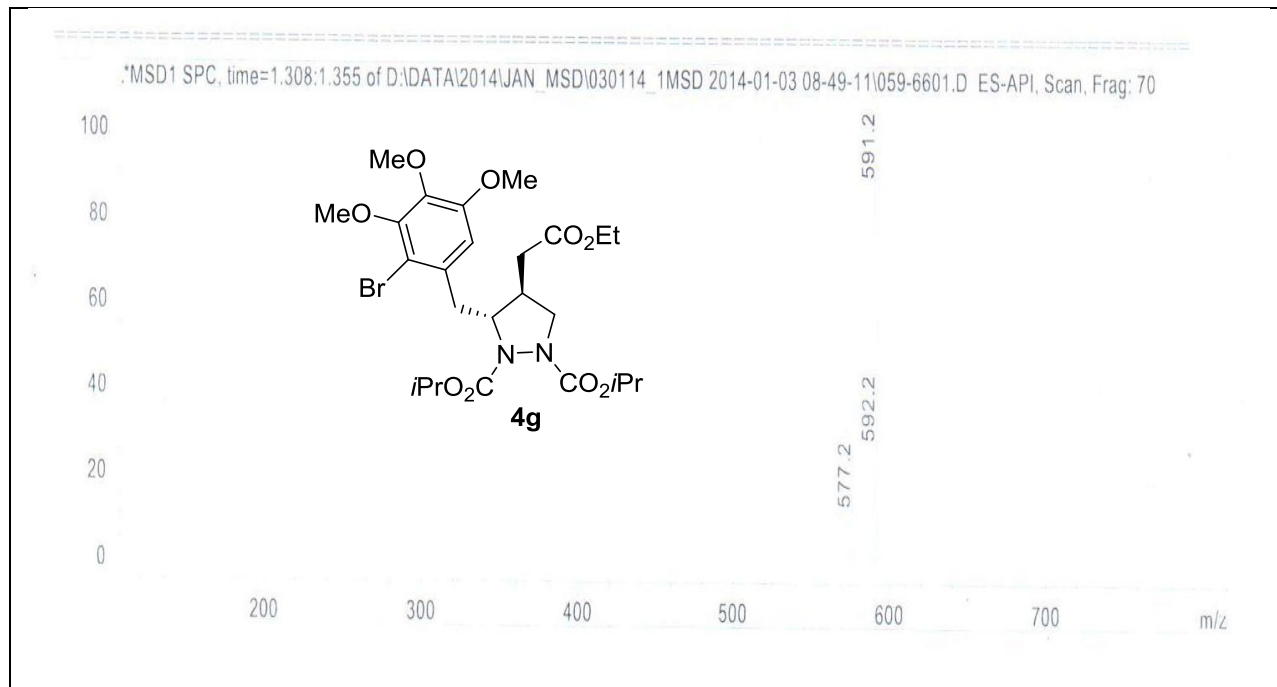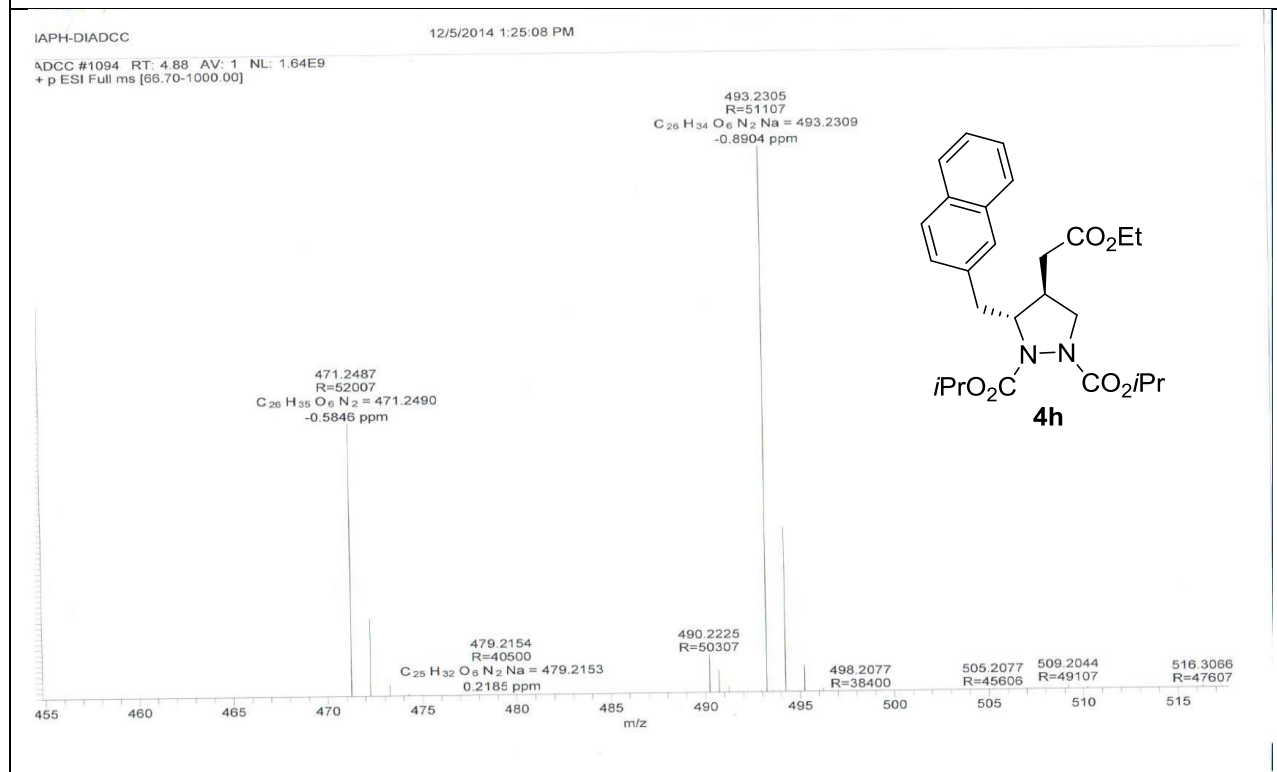

LC-MS and HRMS of **4g** and **4h**

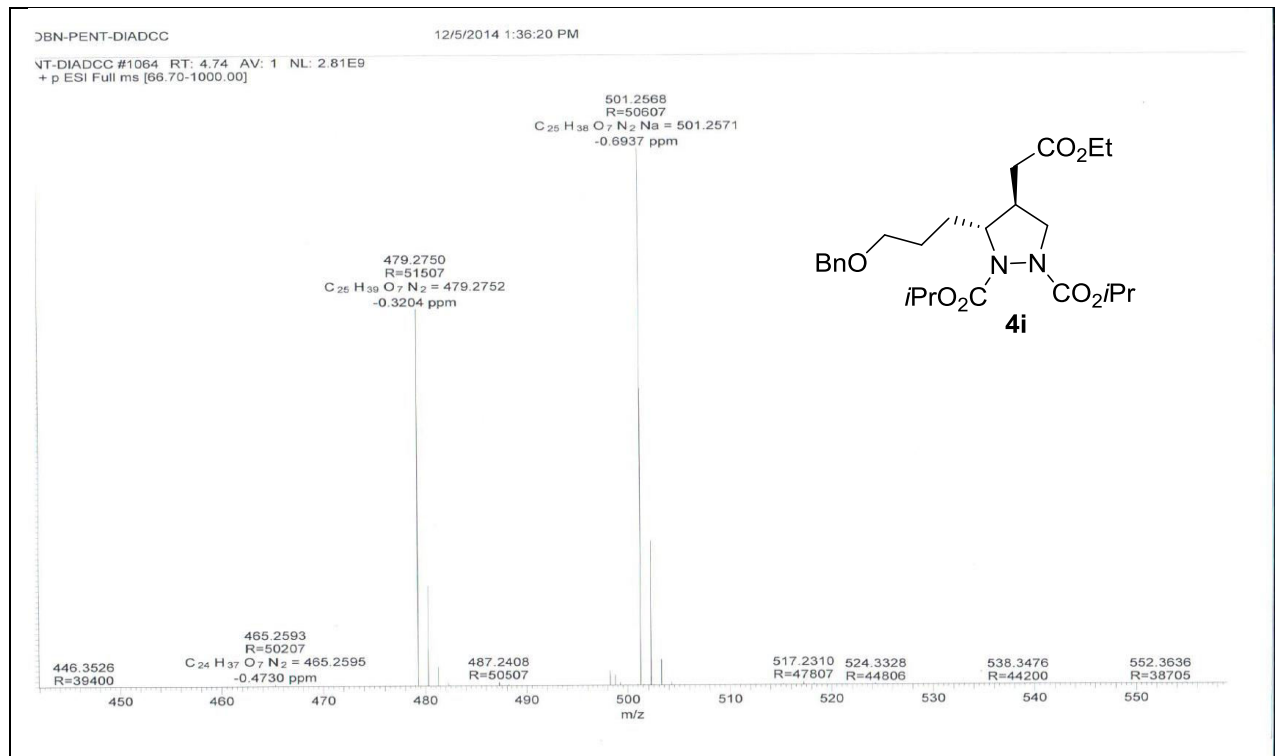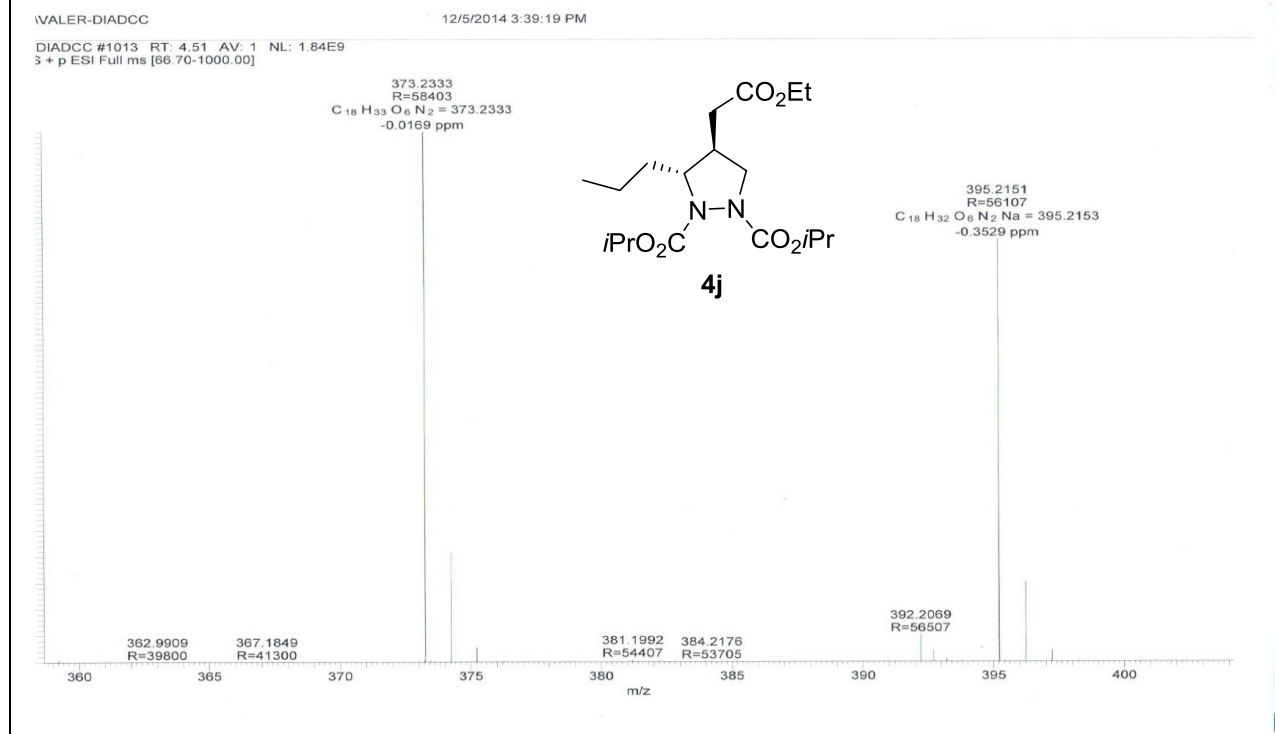

HRMS of **4i** and **4j**

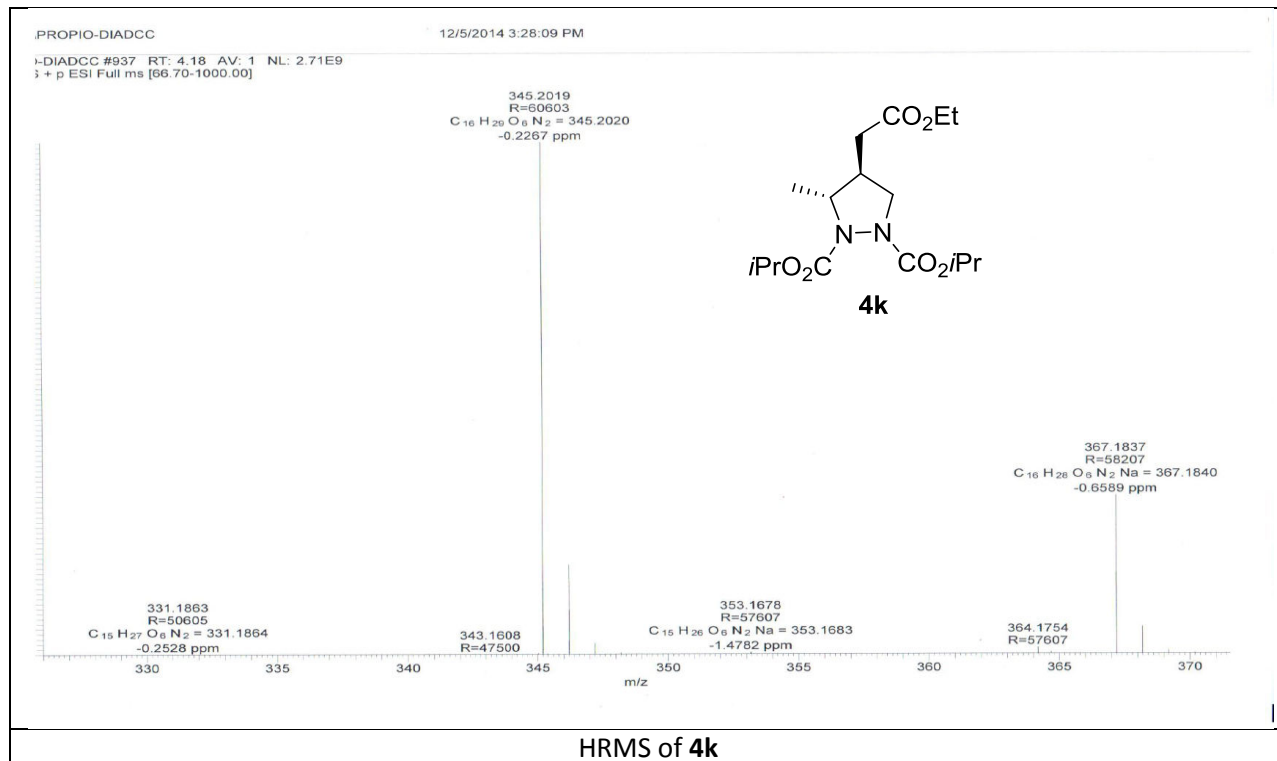



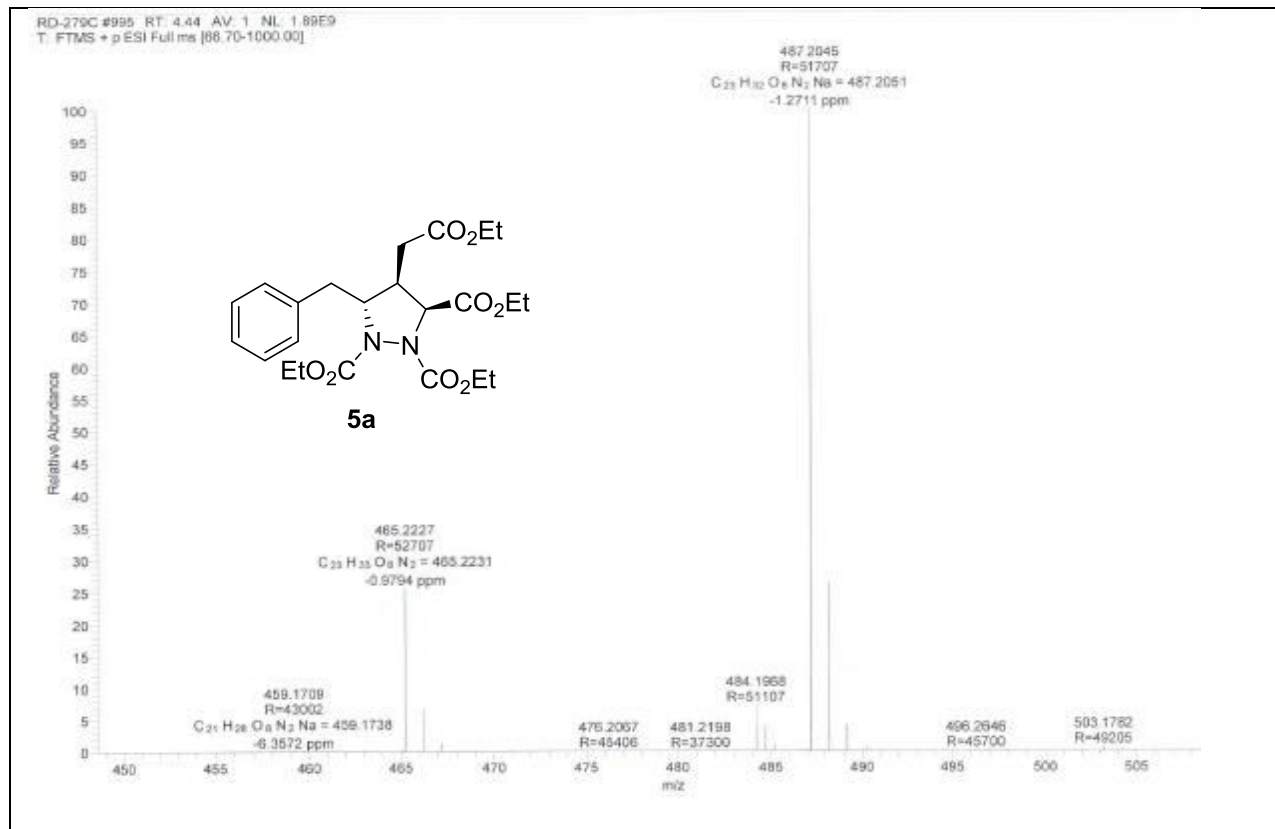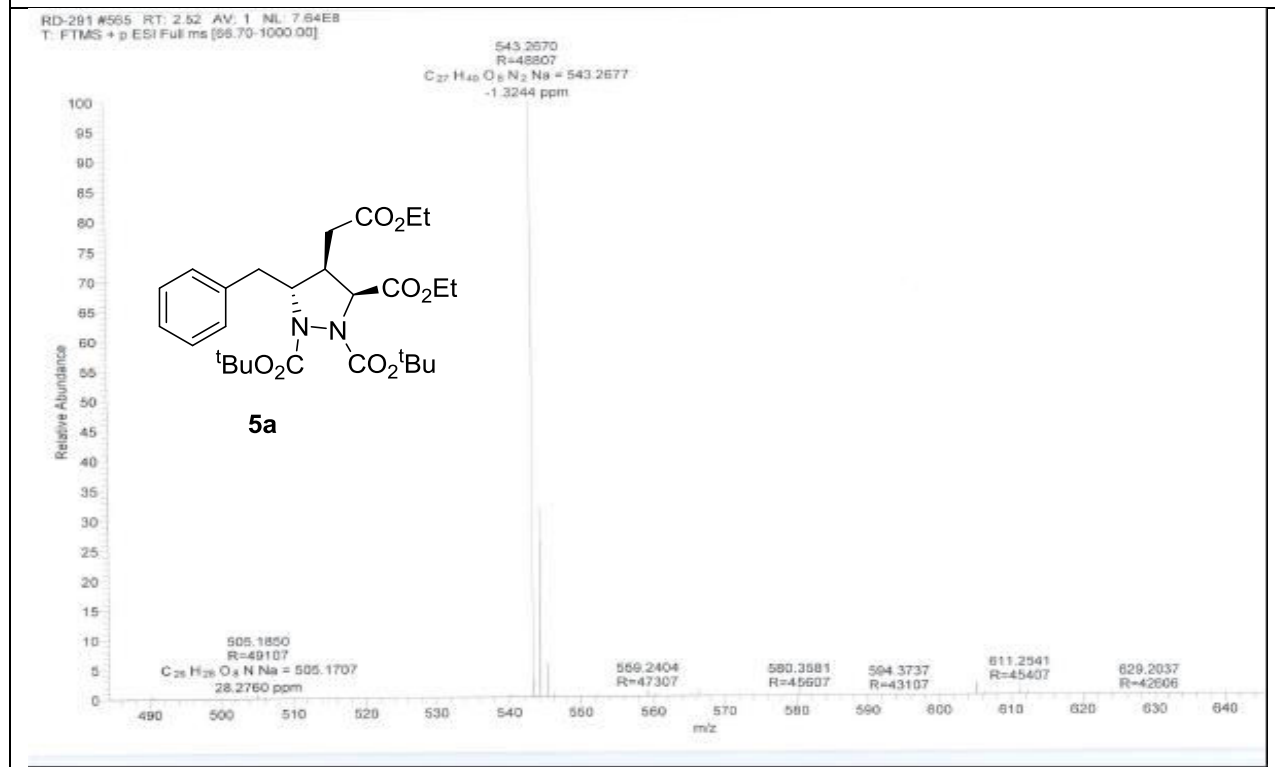

HRMS of **5a** (R' = Et or <sup>t</sup>Bu)

RD-325 #444 RT: 1.88 AV: 1 NL: 7.31E8  
T: FTMS + p ESI Full ms [88.70-1000.00]

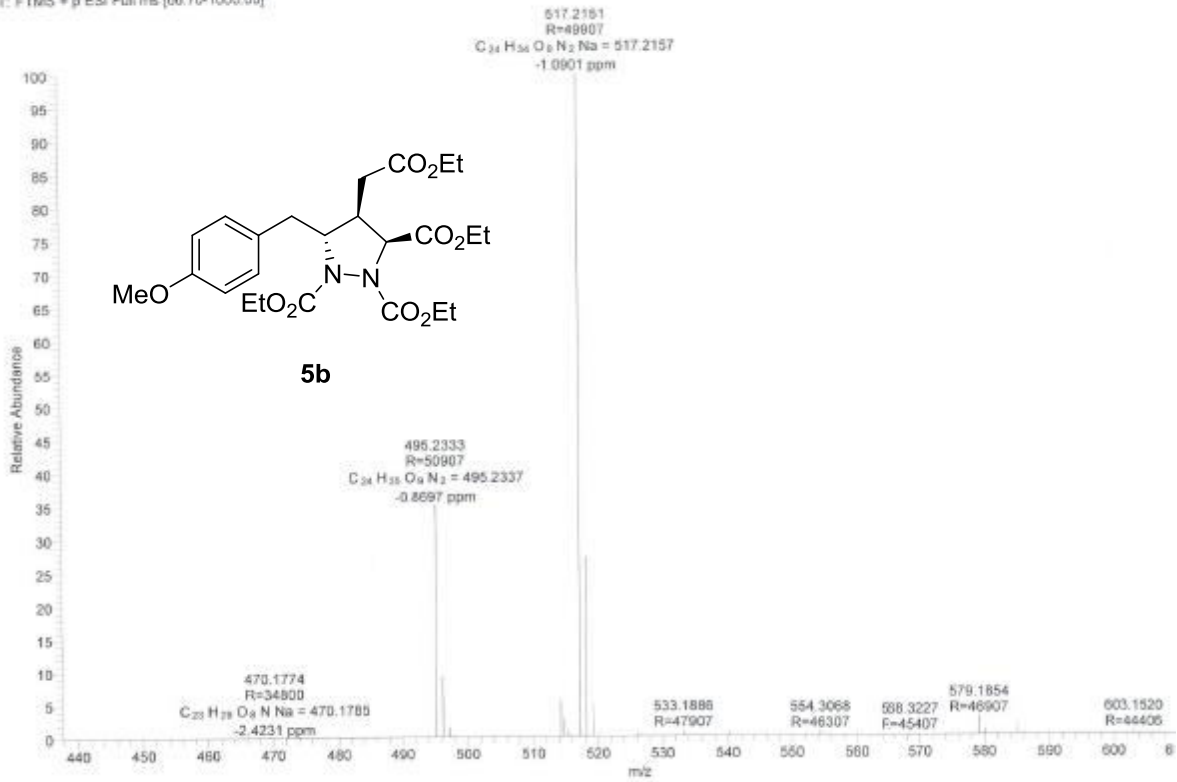

RD-330B #984 RT: 4.39 AV: 1 NL: 6.62E8  
T: FTMS + p ESI Full ms [88.70-1000.00]

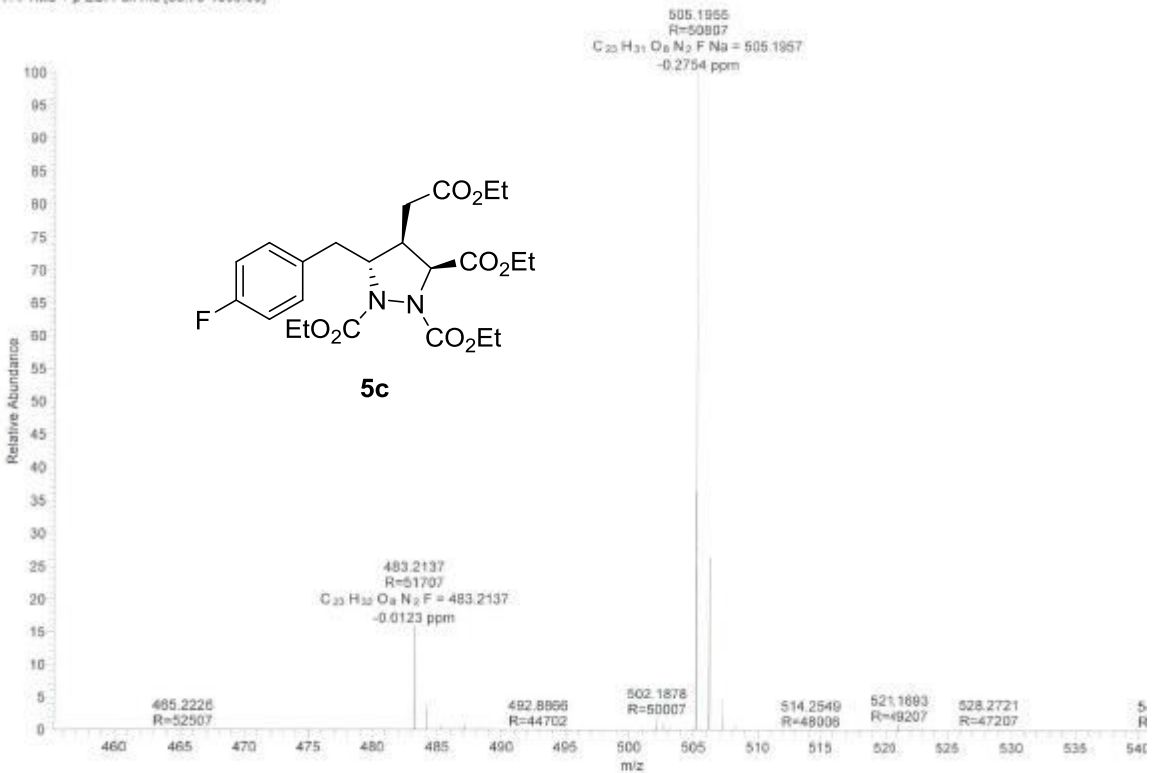

HRMS of 5b and 5c

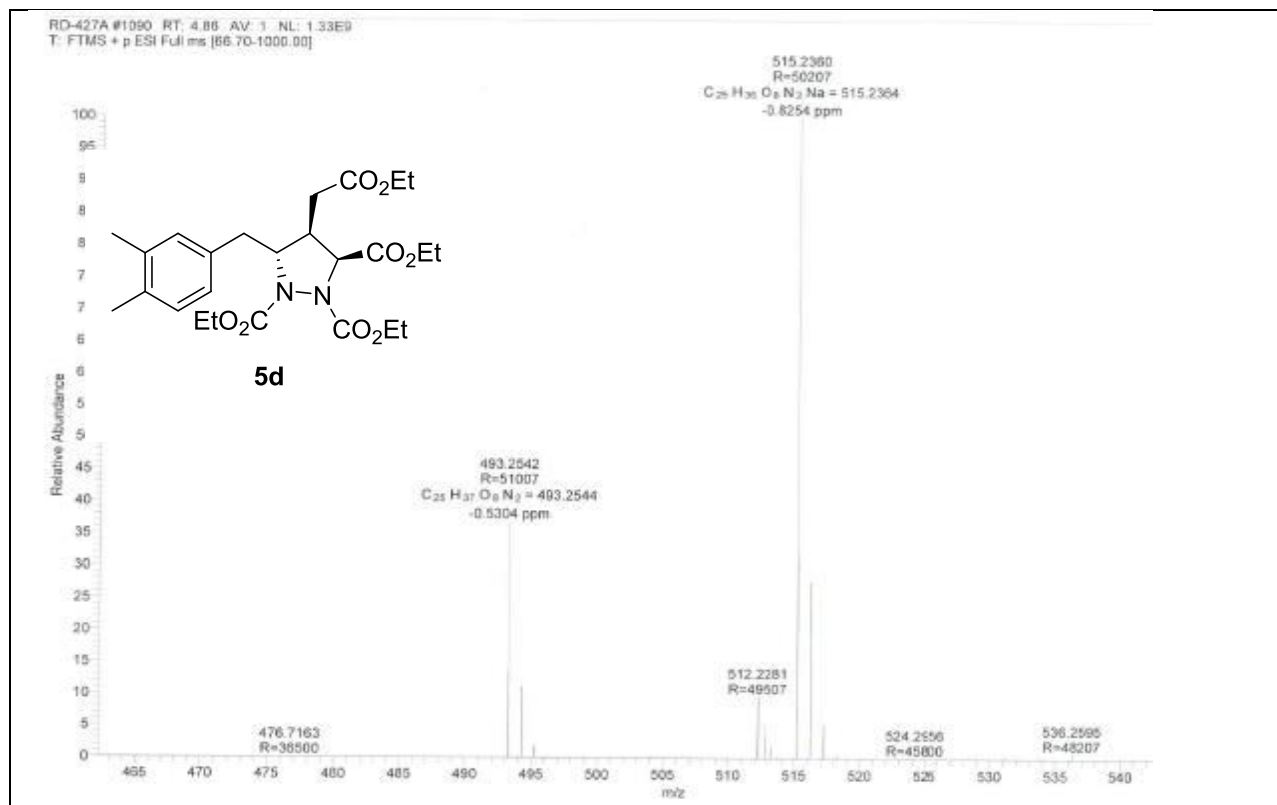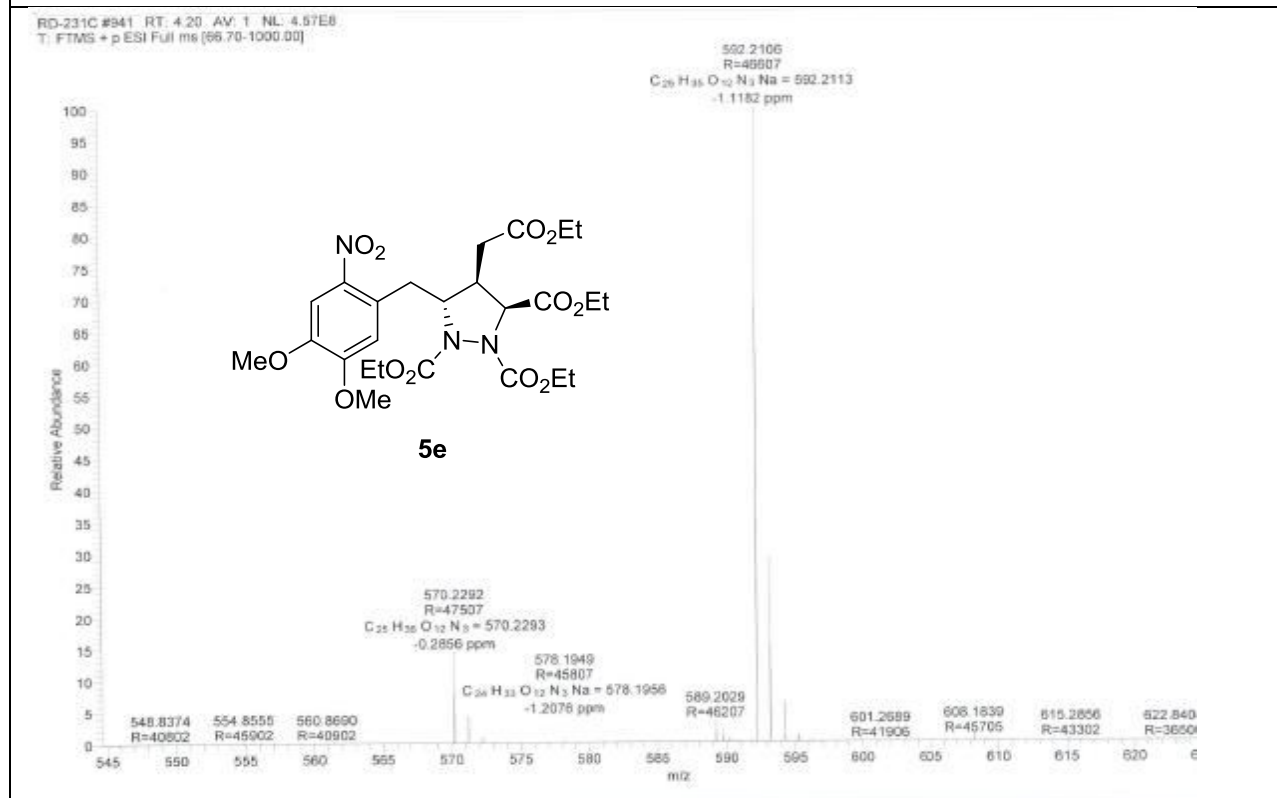

HRMS of **5d** and **5e**

RD-439B #1088 RT: 4.85 AV: 1 NL: 8.97E8  
T: FTMS + p ESI Full ms [66.70-1000.00]

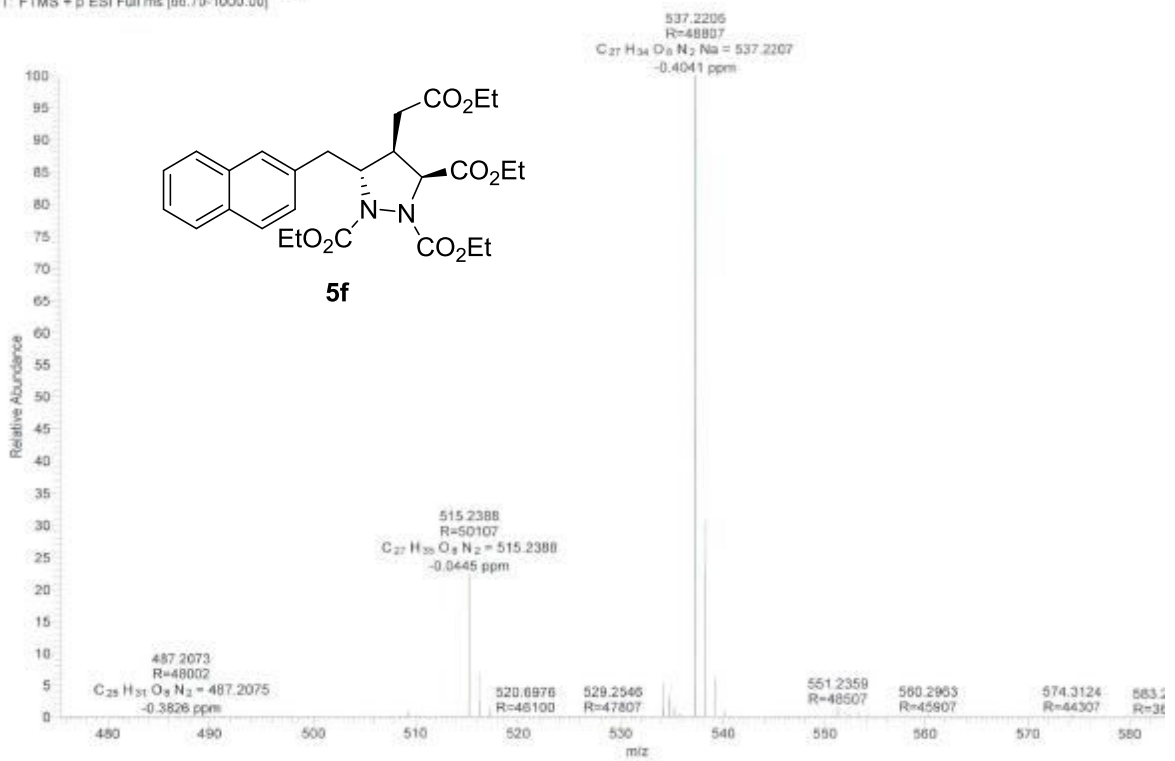

RD-312 #496 RT: 2.21 AV: 1 NL: 1.32E9  
T: FTMS + p ESI Full ms [66.70-1000.00]

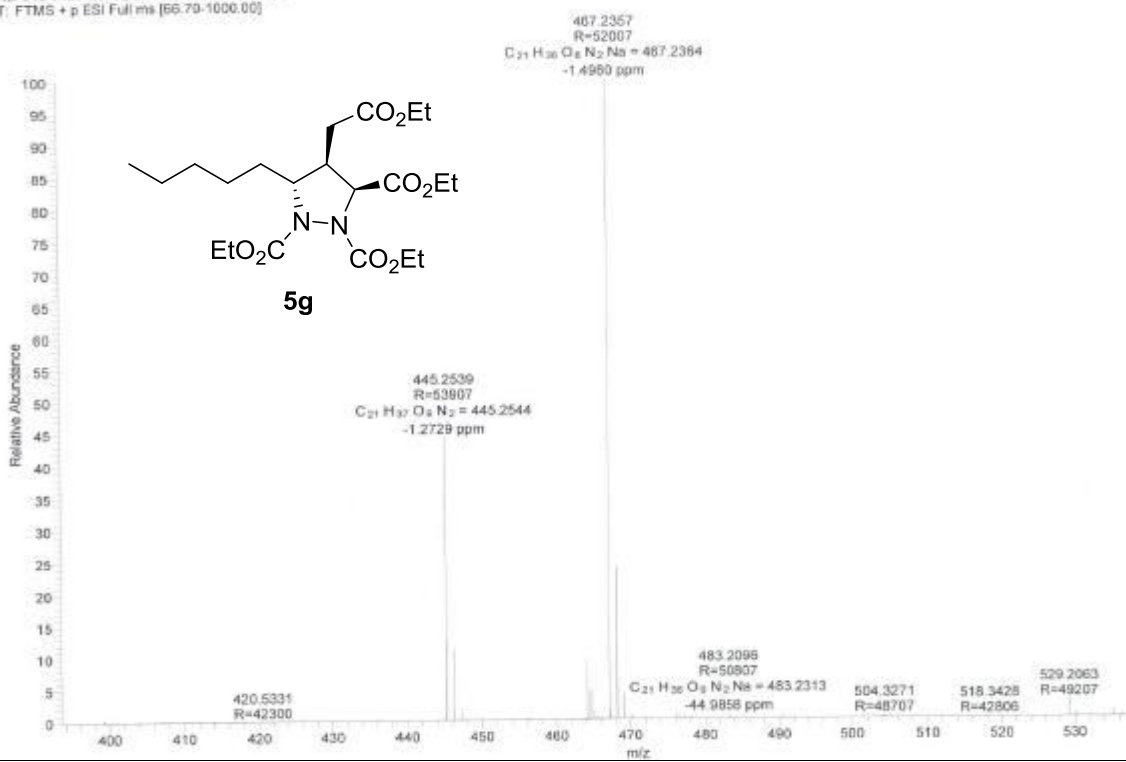

HRMS of **5f** and **5g**

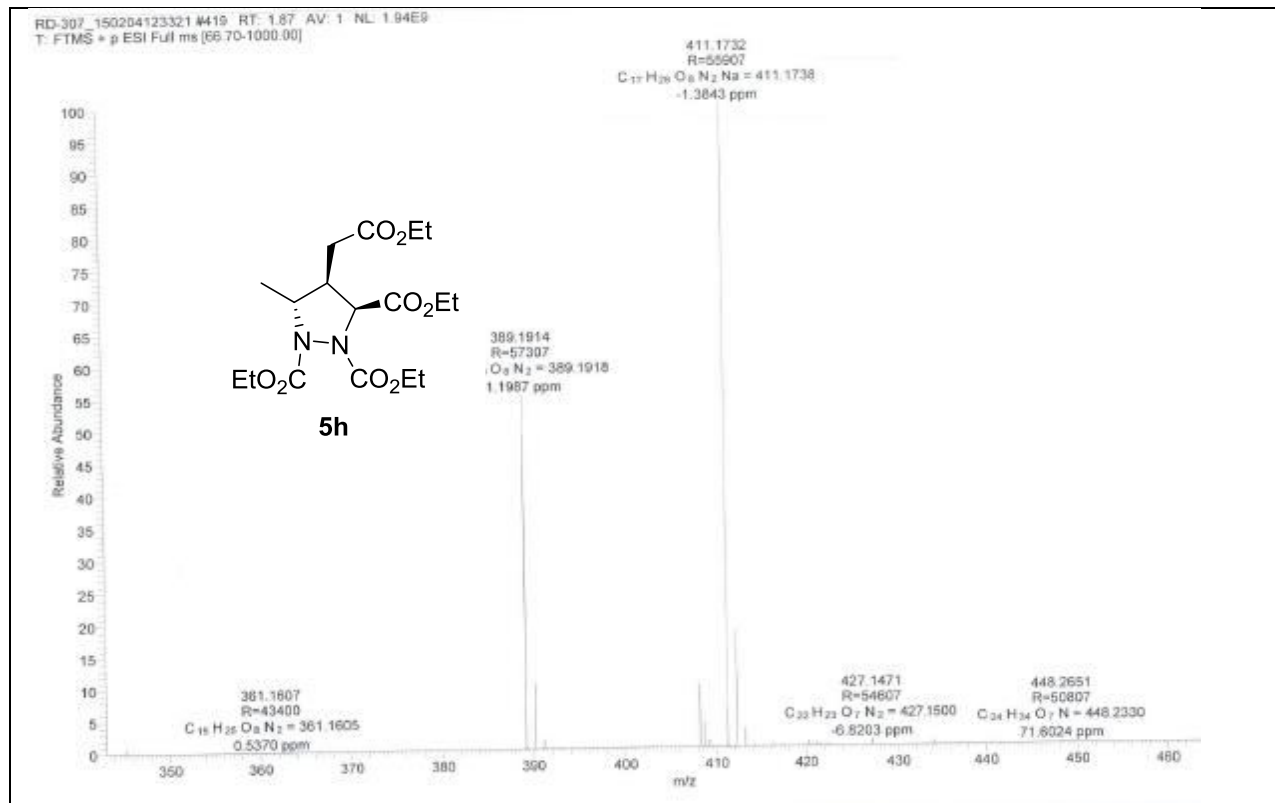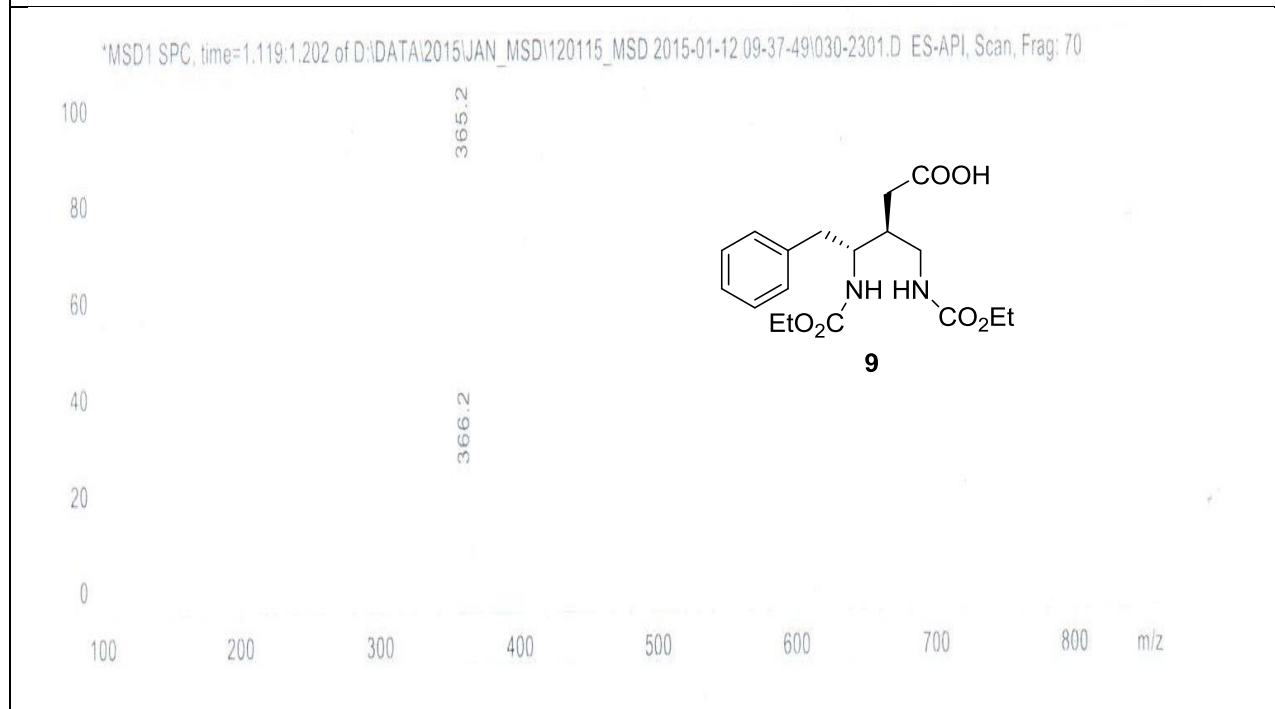

HRMS of **7h** and **9**

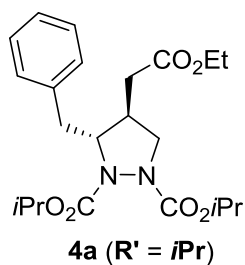

Racemic Sample:

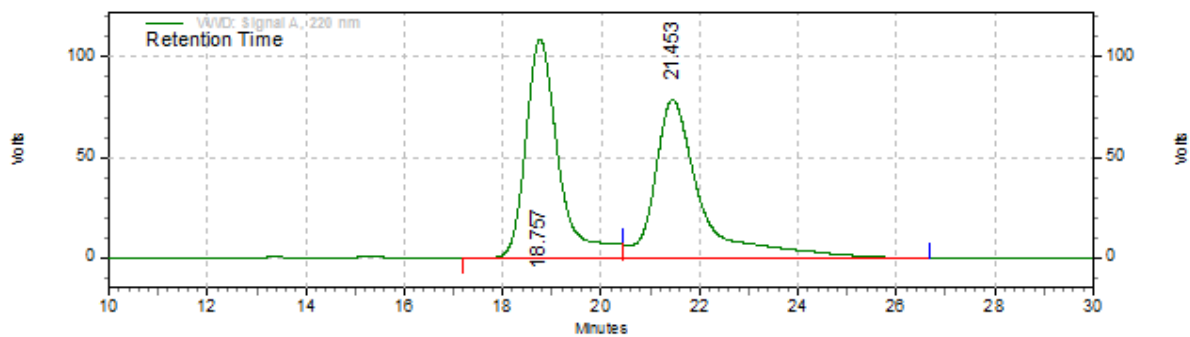

| Retention Time | Area     | Area % | Height  |
|----------------|----------|--------|---------|
| 18.757         | 84618996 | 49.69  | 1825321 |
| 21.453         | 85657844 | 50.31  | 1321061 |

Enantio-enriched sample: **86% ee**

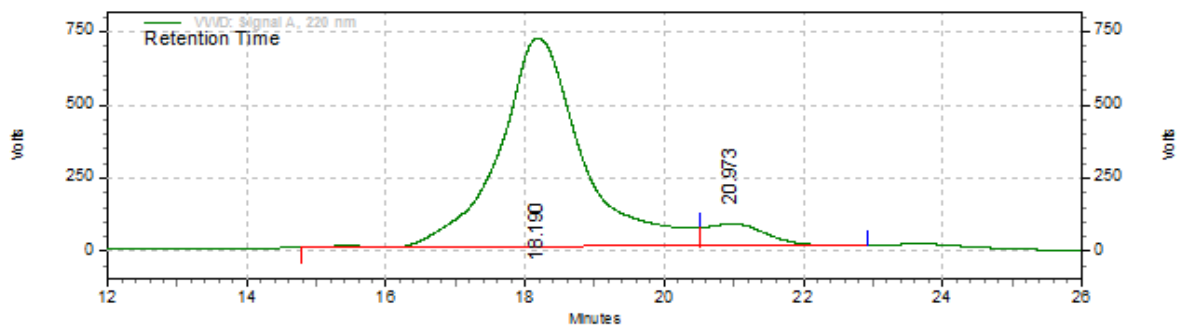

| Retention Time | Area       | Area % | Height   |
|----------------|------------|--------|----------|
| 18.190         | 1002409191 | 93.76  | 11991940 |
| 20.973         | 78236881   | 6.24   | 1297069  |

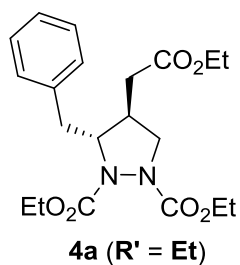

Racemic sample:

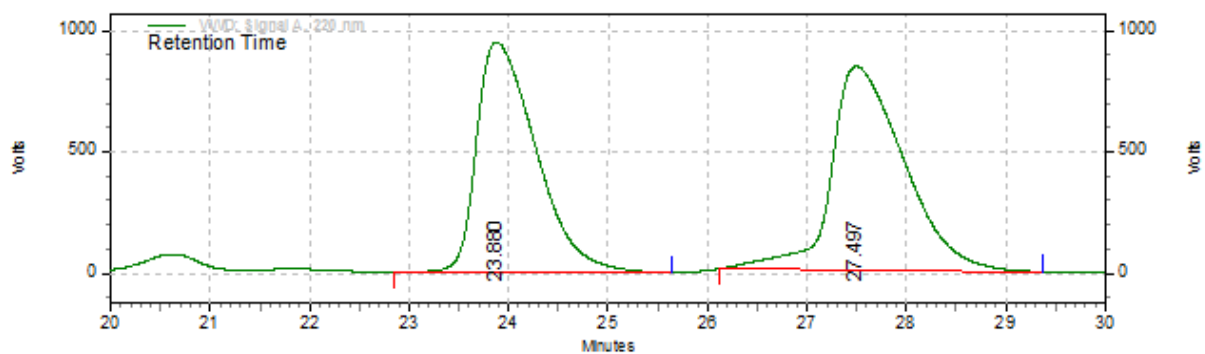

| Retention Time | Area      | Area % | Height   |
|----------------|-----------|--------|----------|
| 23.880         | 659119152 | 47.80  | 15911939 |
| 27.497         | 719688844 | 52.20  | 14078455 |

Enantio-enriched sample: **81% ee**

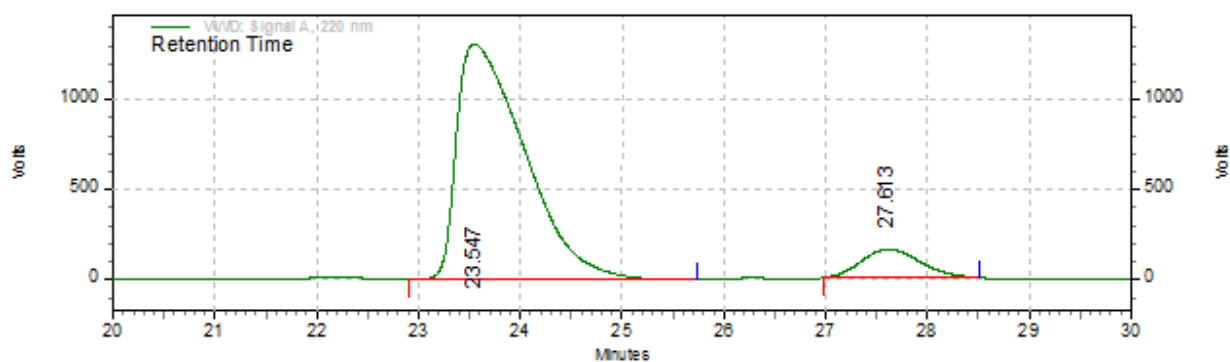

| Retention Time | Area       | Area % | Height   |
|----------------|------------|--------|----------|
| 23.547         | 1017434138 | 90.44  | 21970544 |
| 27.613         | 107570511  | 9.56   | 2654812  |

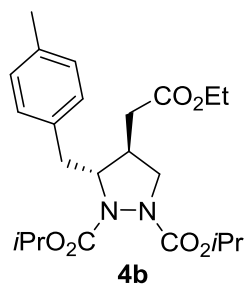

Racemic sample:

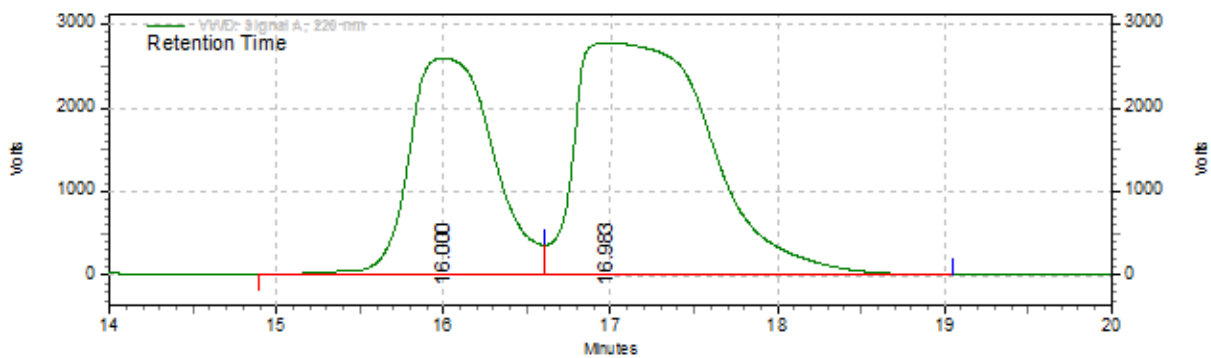

| Retention Time | Area       | Area % | Height   |
|----------------|------------|--------|----------|
| 16.000         | 1495482427 | 36.60  | 43252175 |
| 16.983         | 2590137720 | 63.40  | 46412467 |

Enantio-enriched sample: **84% ee**

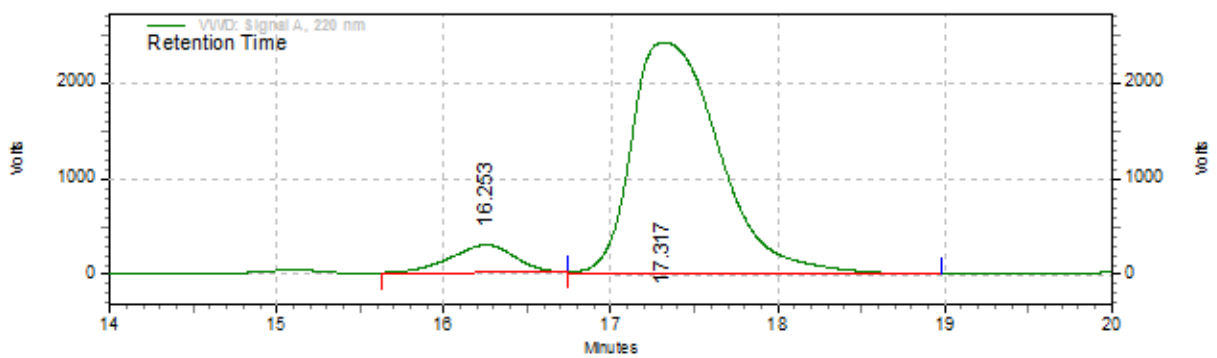

| Retention Time | Area       | Area % | Height   |
|----------------|------------|--------|----------|
| 16.253         | 127949994  | 7.96   | 4800475  |
| 17.317         | 1479570056 | 92.04  | 40616457 |



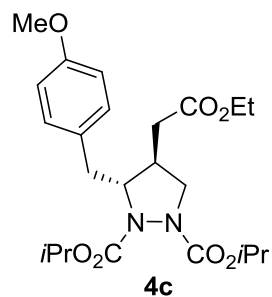

Racemic sample:

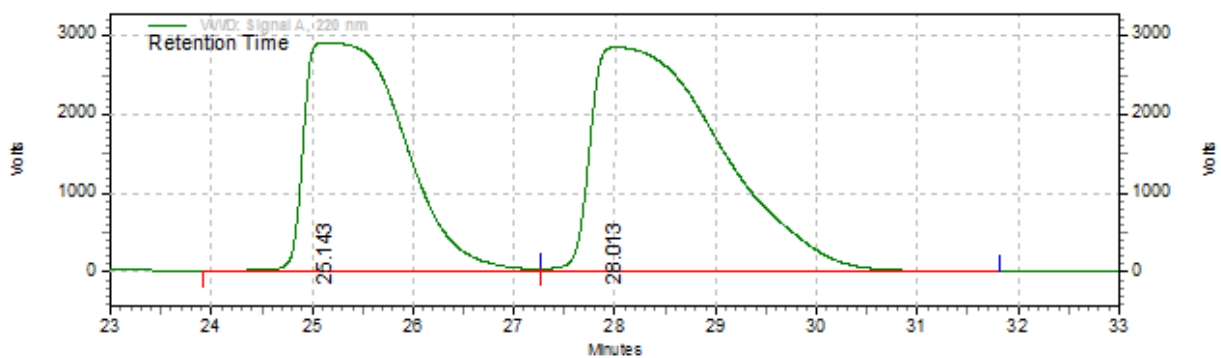

| Retention Time | Area       | Area % | Height   |
|----------------|------------|--------|----------|
| 25.143         | 3281681142 | 43.84  | 48695184 |
| 28.013         | 4204639512 | 56.16  | 47665050 |

Enantio-enriched sample: **87% ee**

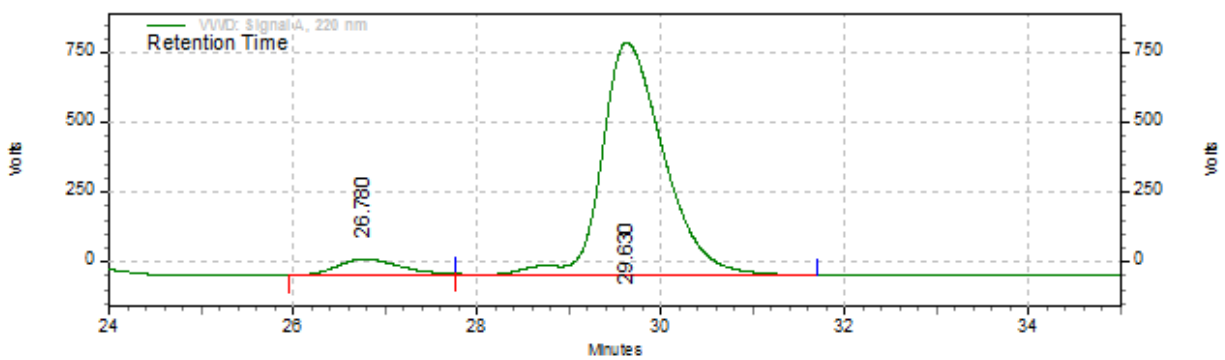

| Retention Time | Area      | Area % | Height   |
|----------------|-----------|--------|----------|
| 26.780         | 48849942  | 6.52   | 993265   |
| 29.630         | 660992825 | 93.48  | 14060767 |

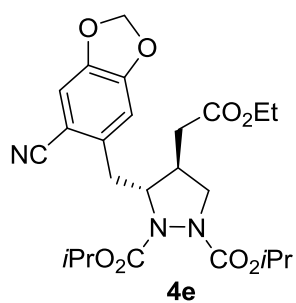

Racemic sample:

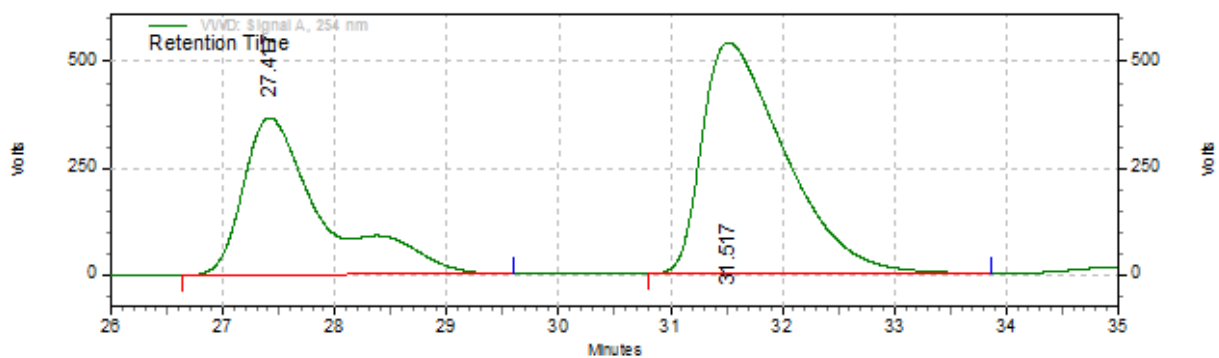

| Retention Time | Area      | Area % | Height  |
|----------------|-----------|--------|---------|
| 27.417         | 306923430 | 39.80  | 6158411 |
| 31.517         | 464169000 | 60.20  | 9048503 |

Enantio-enriched sample: **81% ee**

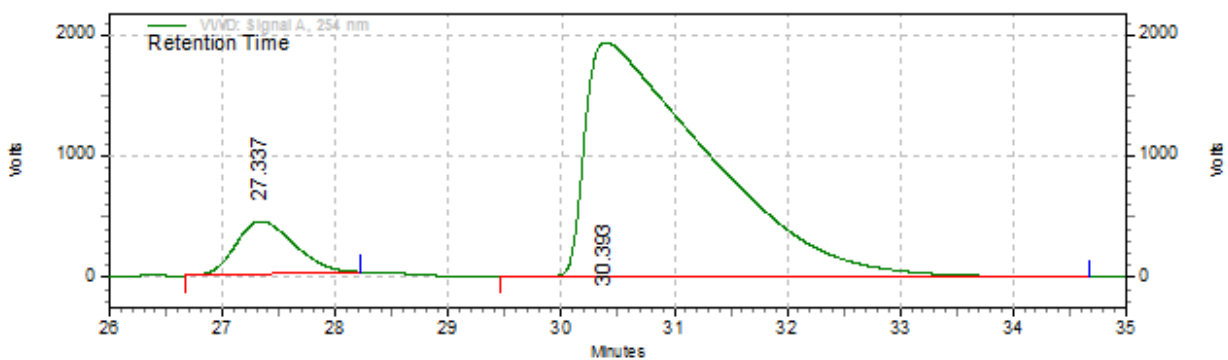

| Retention Time | Area       | Area % | Height   |
|----------------|------------|--------|----------|
| 27.337         | 262934762  | 9.66   | 7342472  |
| 30.393         | 2460238647 | 90.34  | 32571042 |

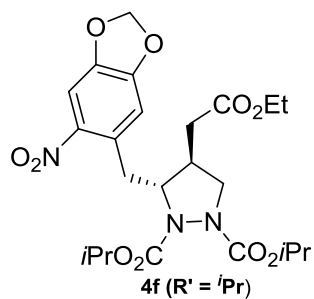

Racemic sample:

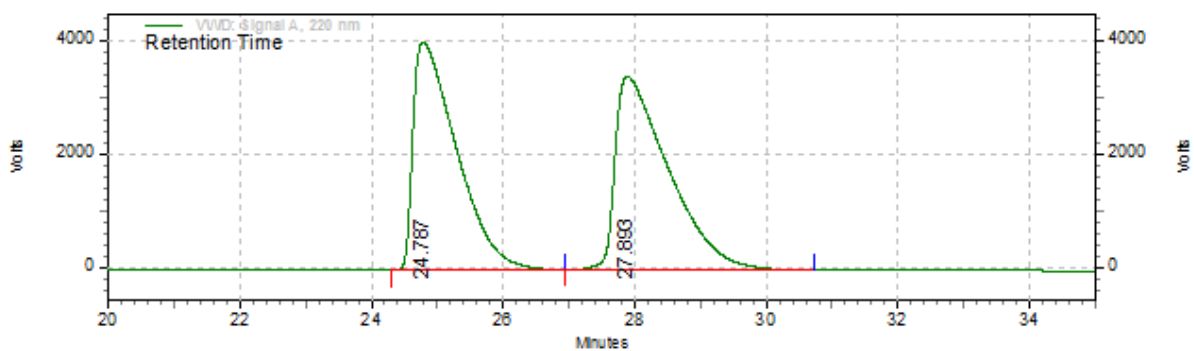

| Retention Time | Area       | Area % | Height   |
|----------------|------------|--------|----------|
| 24.787         | 3107985469 | 48.94  | 67448379 |
| 27.893         | 3242276467 | 51.06  | 57271731 |

Enantio-enriched sample: **92% ee**

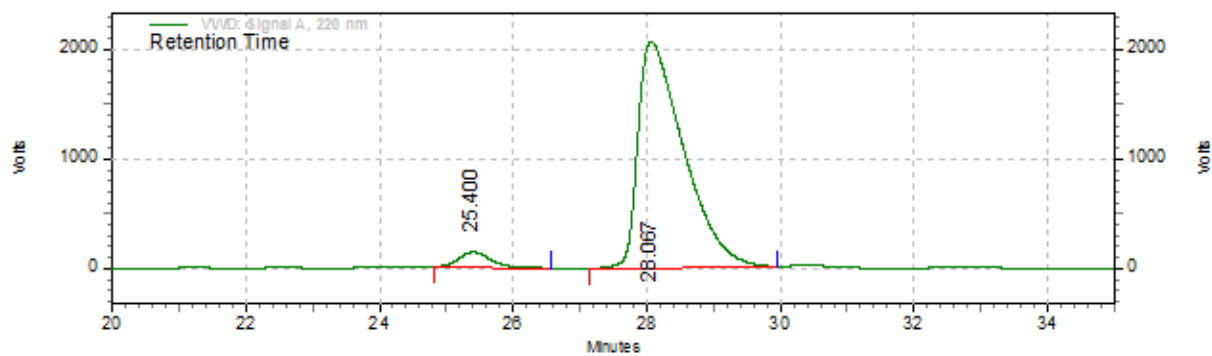

| Retention Time | Area       | Area % | Height   |
|----------------|------------|--------|----------|
| 25.400         | 71363378   | 4.17   | 2237840  |
| 28.067         | 1640468138 | 95.83  | 34610990 |

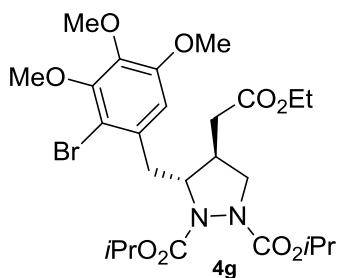

Racemic sample:

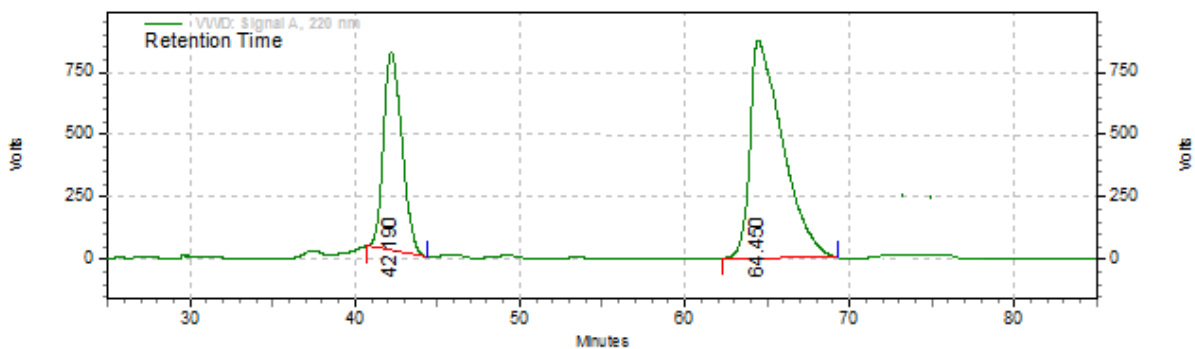

| Retention Time | Area       | Area % | Height   |
|----------------|------------|--------|----------|
| 42.190         | 1035684039 | 34.02  | 13350151 |
| 64.450         | 2008736351 | 65.98  | 14628097 |

Enantio-enriched sample: **94% ee**

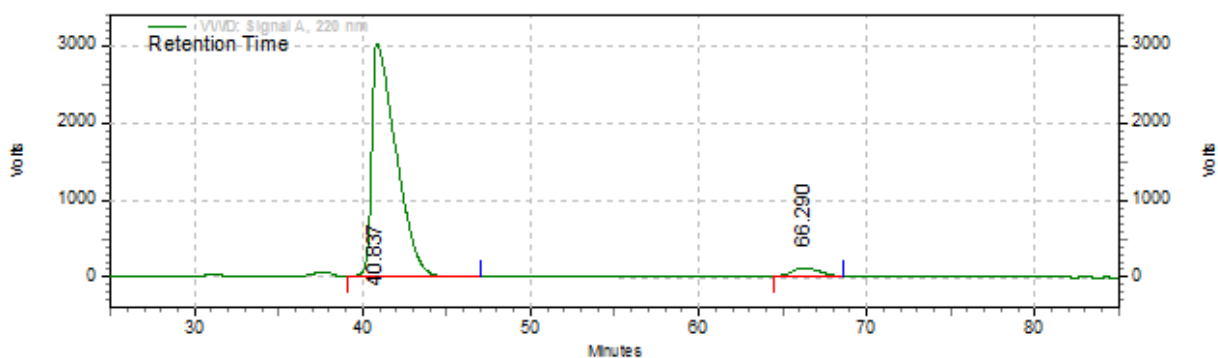

| Retention Time | Area       | Area % | Height   |
|----------------|------------|--------|----------|
| 40.837         | 5055800703 | 97.17  | 50698385 |
| 66.290         | 211276274  | 2.83   | 1857010  |

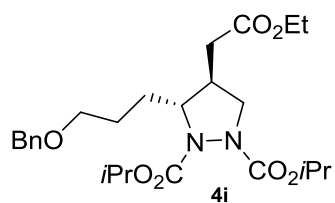

Racemic sample:

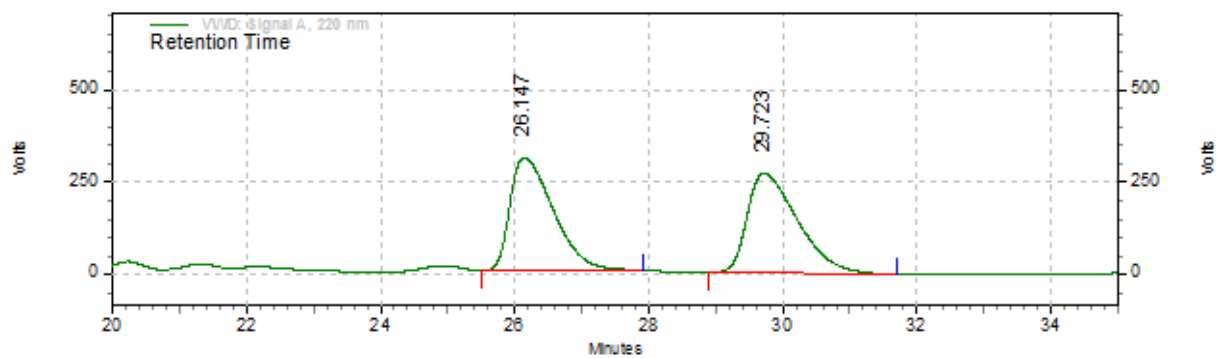

| Retention Time | Area      | Area % | Height  |
|----------------|-----------|--------|---------|
| 26.147         | 230752367 | 49.27  | 5136672 |
| 29.723         | 237610219 | 50.73  | 4523819 |

Enantio-enriched sample: **92% ee**

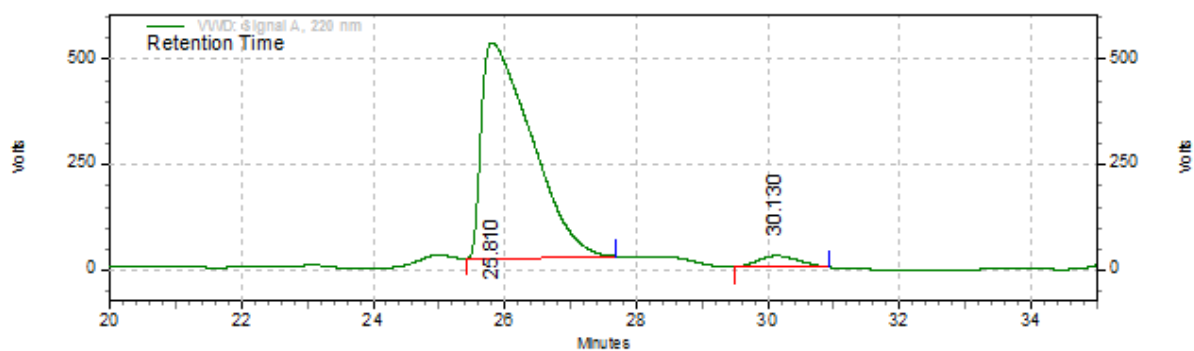

| Retention Time | Area      | Area % | Height  |
|----------------|-----------|--------|---------|
| 25.810         | 452815957 | 95.95  | 8587946 |
| 30.130         | 19116198  | 4.05   | 449632  |

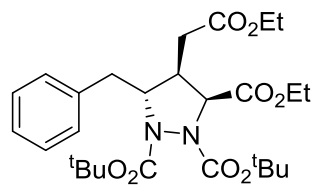

5a

Racemic Sample:

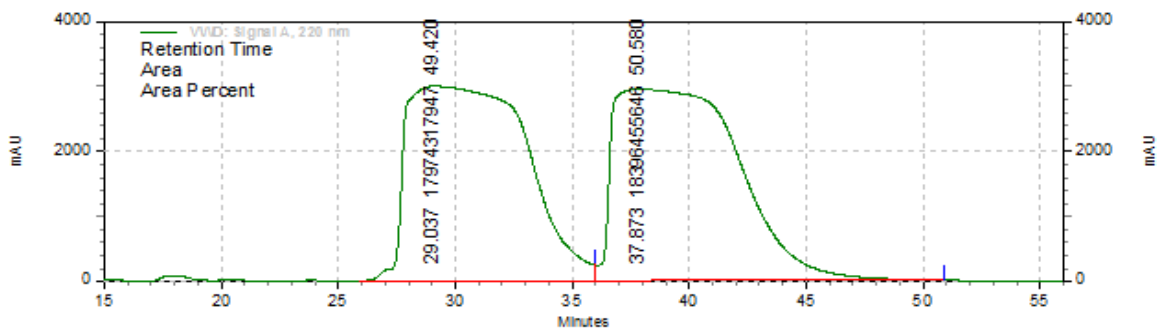

| Retention Time | Area        | Area % | Height   |
|----------------|-------------|--------|----------|
| 29.037         | 17974317947 | 49.42  | 50173222 |
| 37.873         | 18396455646 | 50.58  | 49320278 |

Enantio-enriched sample: **86% ee**

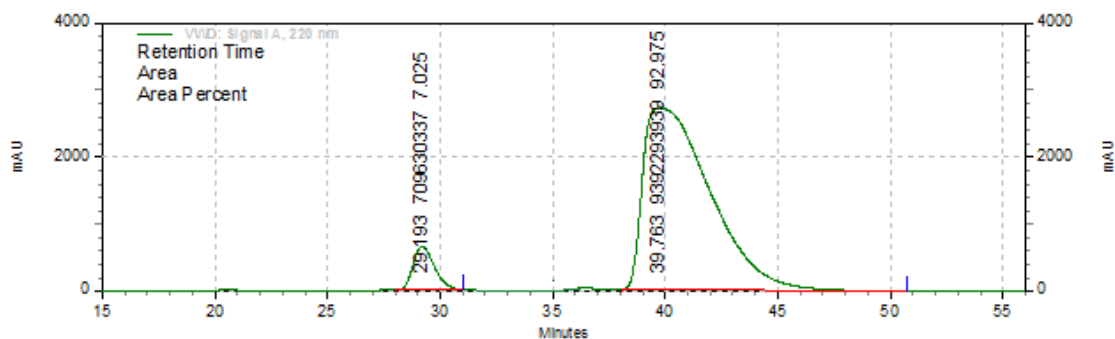

| Retention Time | Area       | Area % | Height   |
|----------------|------------|--------|----------|
| 29.193         | 709630337  | 7.02   | 10738881 |
| 39.763         | 9392293939 | 92.98  | 45406319 |

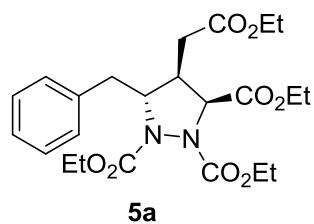

Racemic Sample:

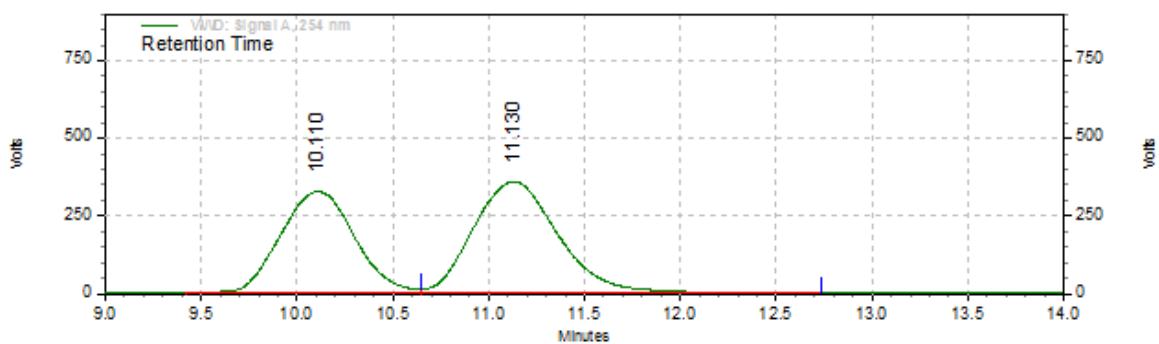

| Retention Time | Area      | Conc. | Height  |
|----------------|-----------|-------|---------|
| 10.110         | 144551914 | 44.12 | 5436080 |
| 11.130         | 183100775 | 55.88 | 6000627 |

Enantio-enriched sample: **96% ee**

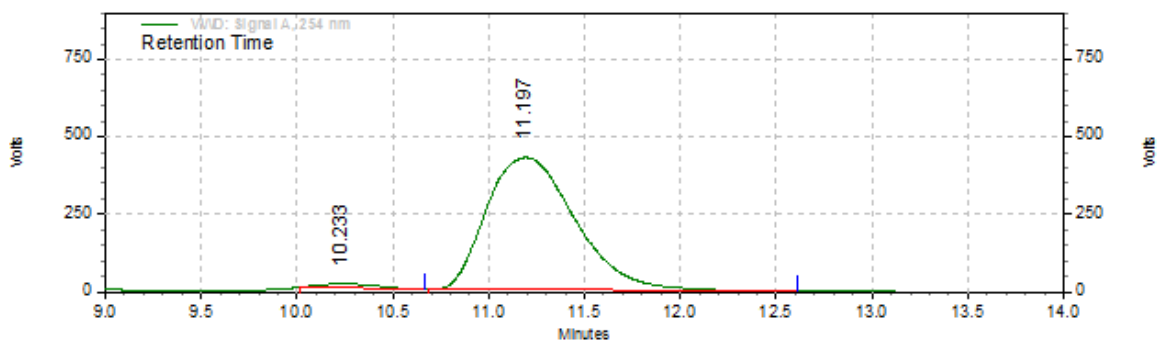

| Retention Time | Area      | Conc. | Height  |
|----------------|-----------|-------|---------|
| 10.233         | 4980694   | 2.10  | 229461  |
| 11.197         | 231657212 | 97.90 | 7181886 |

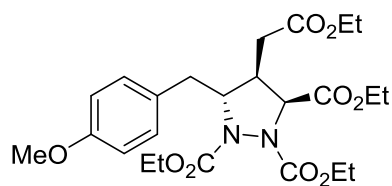

**5b**

Racemic sample:

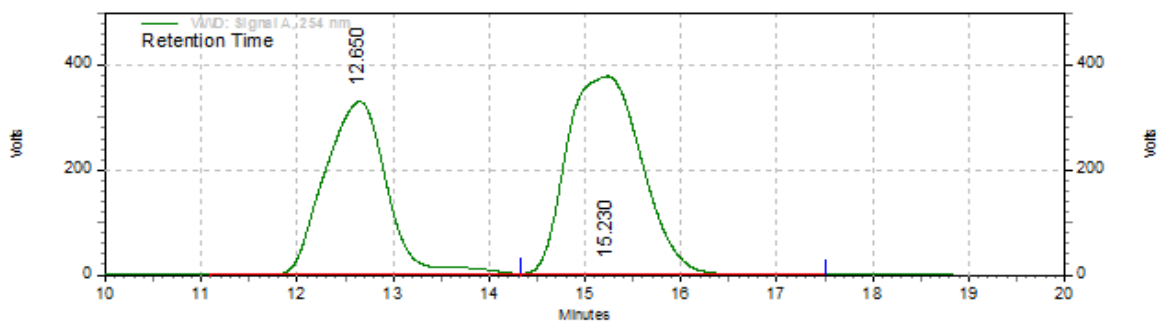

| Retention Time | Area      | Conc. | Height  |
|----------------|-----------|-------|---------|
| 12.650         | 249172903 | 42.05 | 5529972 |
| 15.230         | 343374744 | 57.95 | 6341927 |

Enantio-enriched sample: **96% ee**

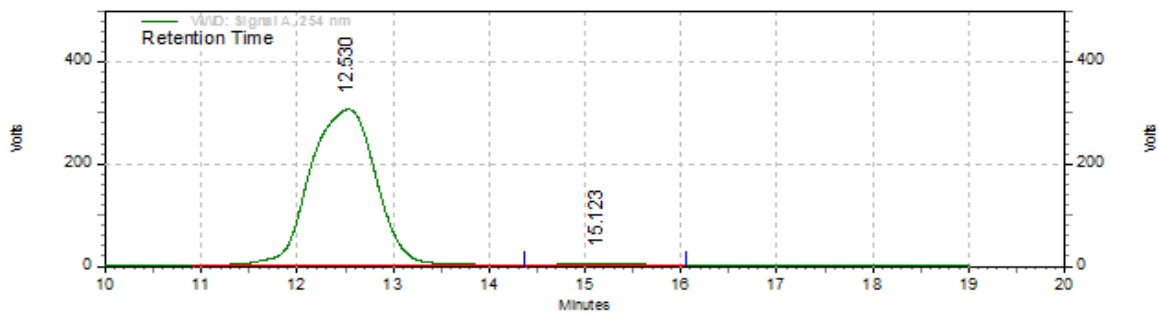

| Retention Time | Area      | Conc. | Height  |
|----------------|-----------|-------|---------|
| 12.530         | 244951558 | 98.33 | 5128098 |
| 15.123         | 4168475   | 1.67  | 83636   |



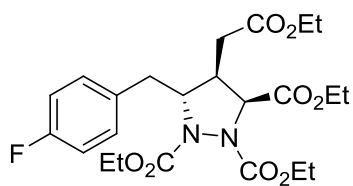

5c

Racemic sample:

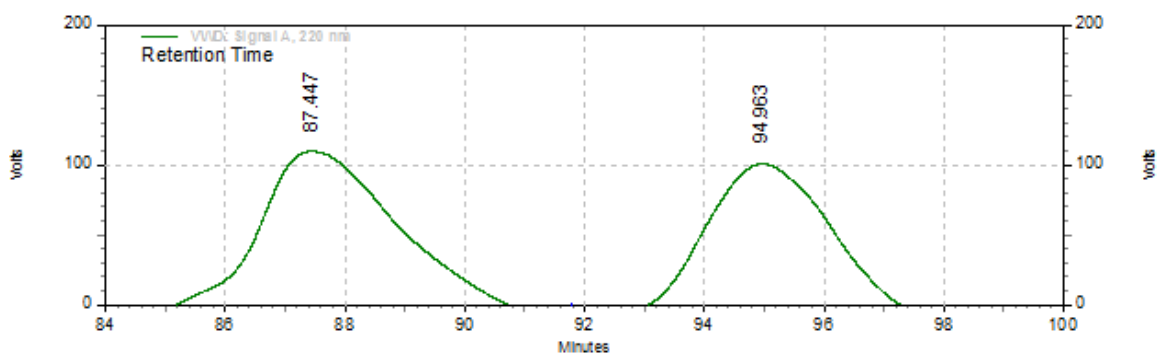

| Retention Time | Area      | Conc. | Height  |
|----------------|-----------|-------|---------|
| 87.447         | 381012622 | 54.30 | 2095550 |
| 94.963         | 320714209 | 45.70 | 1982892 |

Enantio-enriched sample: **95% ee**

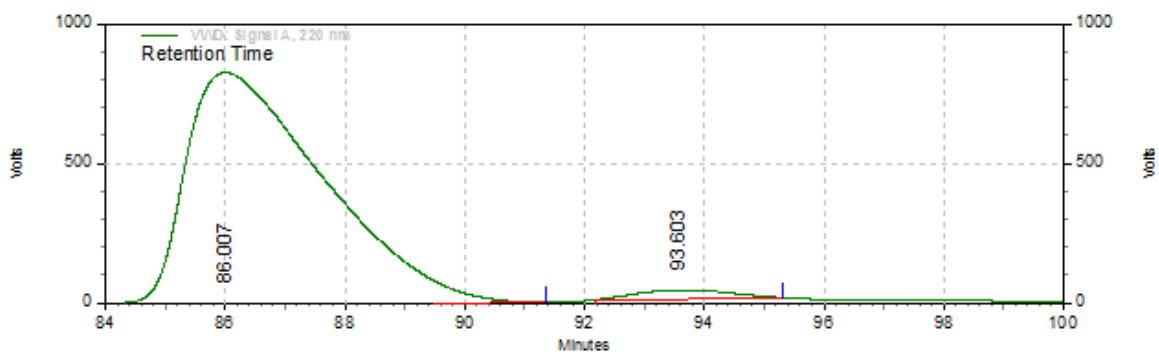

| Retention Time | Area       | Conc. | Height   |
|----------------|------------|-------|----------|
| 86.007         | 2207902336 | 97.49 | 13887984 |
| 93.603         | 56955538   | 2.51  | 527171   |

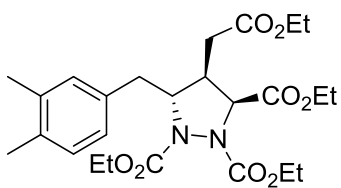

**5d**

Racemic sample:

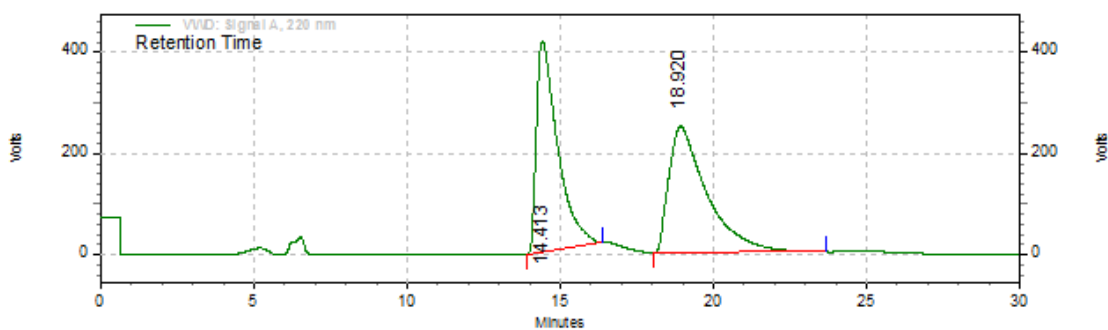

| Retention Time | Area      | Conc. | Height  |
|----------------|-----------|-------|---------|
| 14.413         | 337981933 | 48.29 | 6997053 |
| 18.920         | 361975051 | 51.71 | 4187736 |

Enantio-enriched sample: **94% ee**

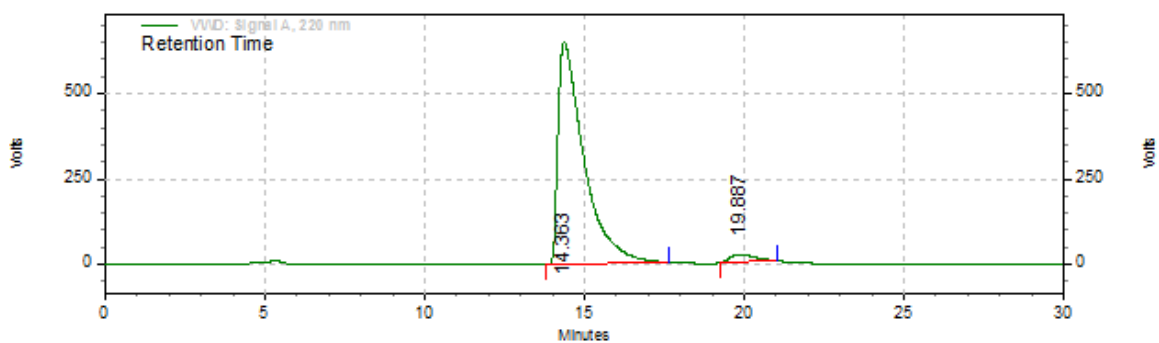

| Retention Time | Area      | Conc. | Height   |
|----------------|-----------|-------|----------|
| 14.363         | 612546105 | 96.72 | 10911976 |
| 19.887         |           |       |          |

19.887

20741660

3.28

374813

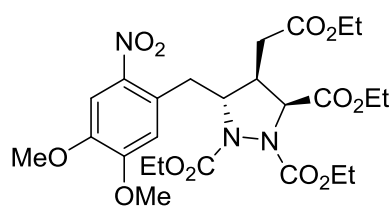**5e**

Racemic sample:

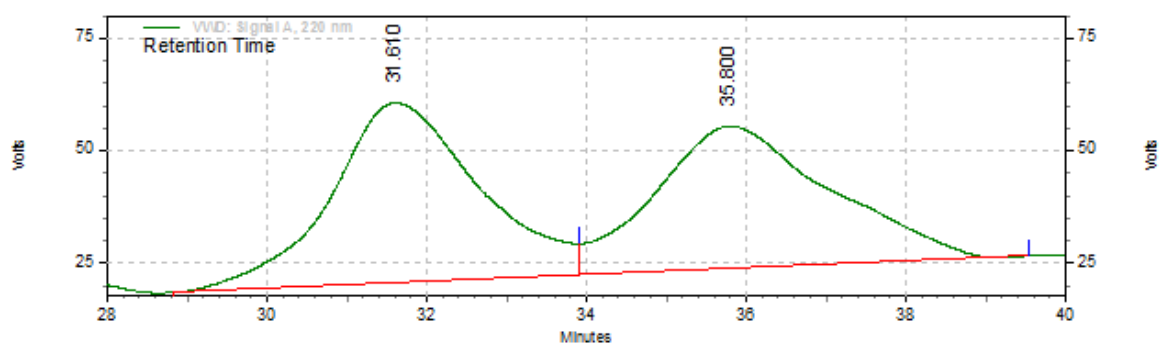

| Retention Time | Area     | Conc. | Height |
|----------------|----------|-------|--------|
| 31.610         | 86274582 | 51.54 | 671354 |
| 35.800         | 81118792 | 48.46 | 532527 |

Enantio-enriched sample: **88% ee**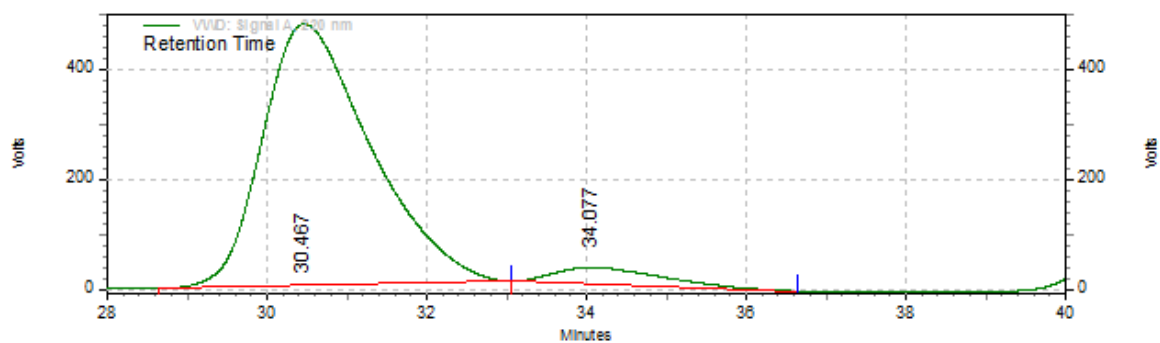

| Retention Time | Area      | Conc. | Height  |
|----------------|-----------|-------|---------|
| 30.467         | 747787806 | 94.00 | 7954334 |
| 34.077         | 47766301  | 6.00  | 511065  |

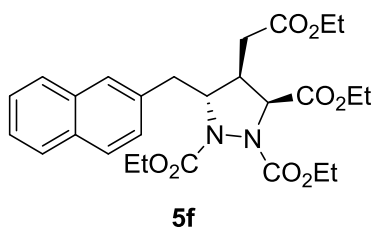

Racemic sample:

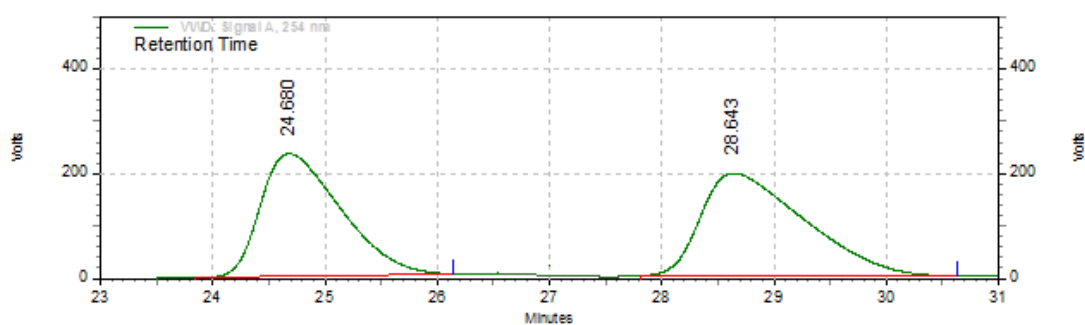

| Retention Time | Area      | Conc. | Height  |
|----------------|-----------|-------|---------|
| 24.680         | 195736780 | 48.25 | 3938803 |
| 28.643         | 209044985 | 51.75 | 3282065 |

Enantio-enriched sample: **94% ee**

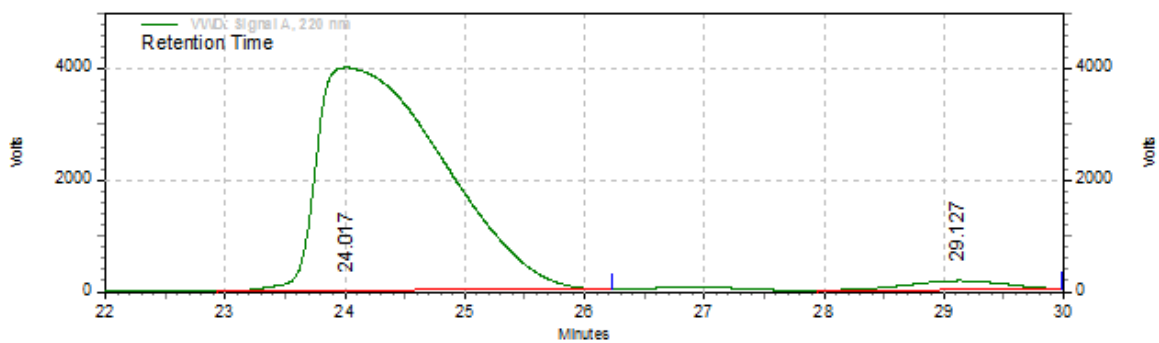

| Retention Time | Area       | Conc. | Height   |
|----------------|------------|-------|----------|
| 24.017         | 4883290118 | 97.22 | 67088890 |
| 29.127         |            |       |          |

29.127

139847311

2.78

2575790

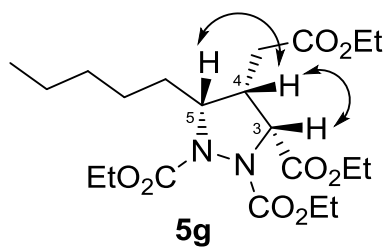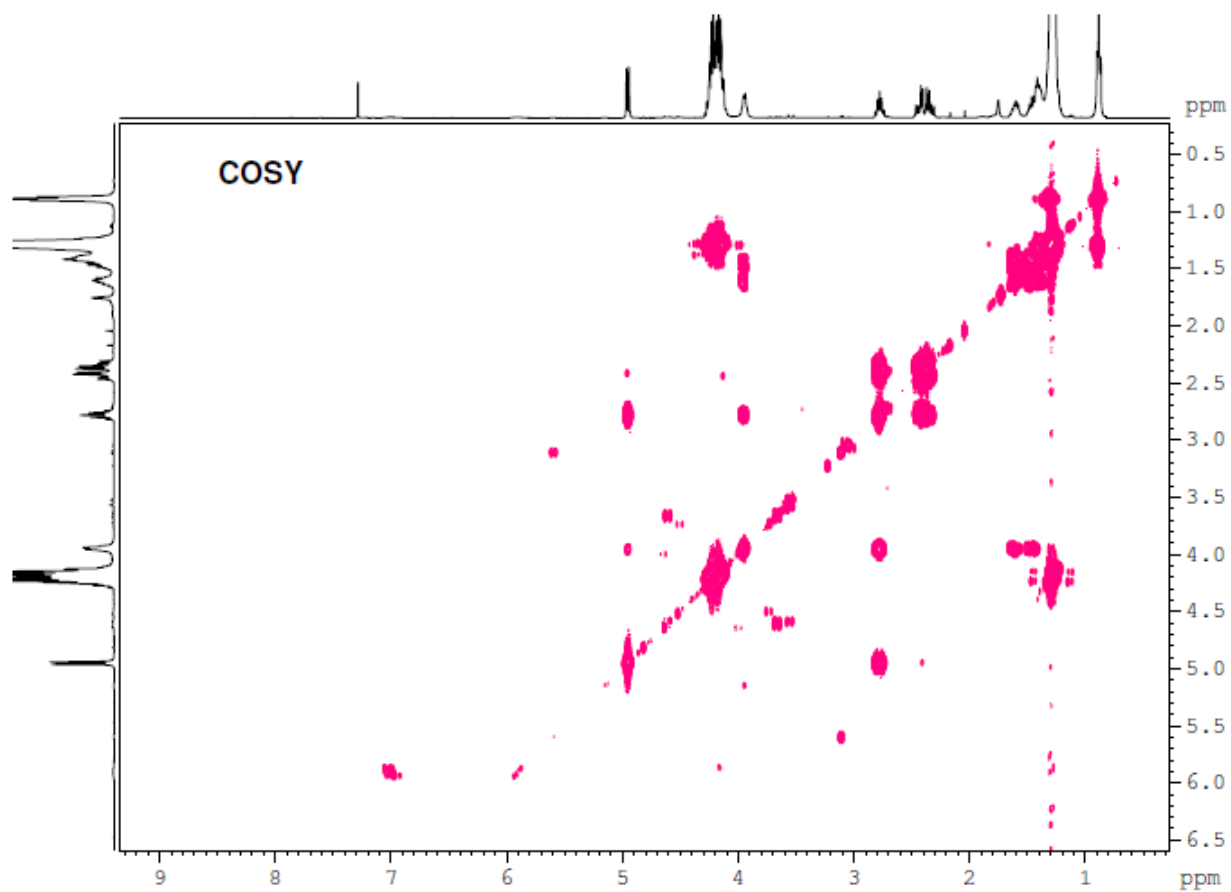

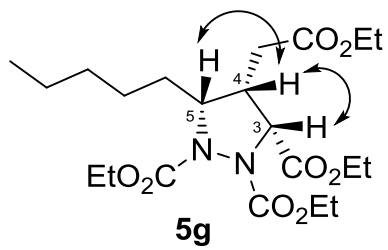

**NOESY**

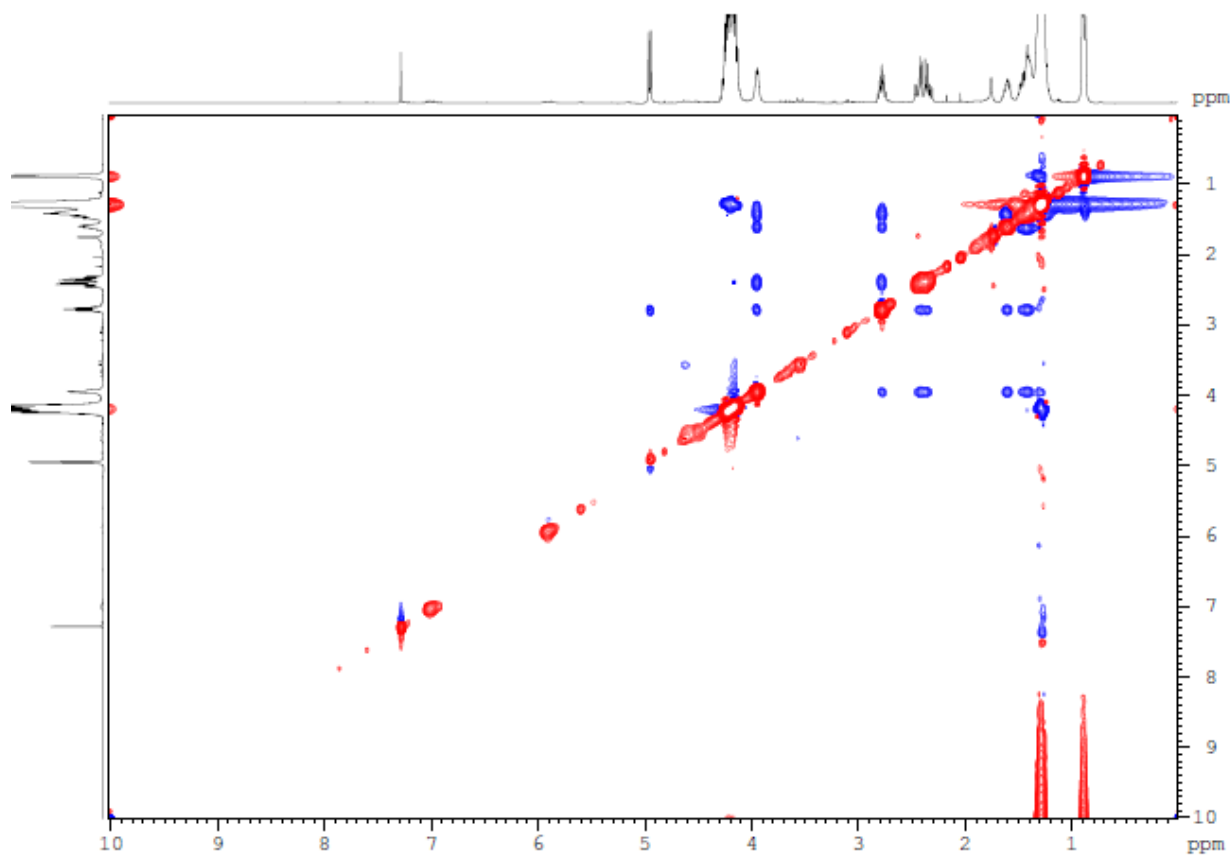

Crystal data of **4f**:

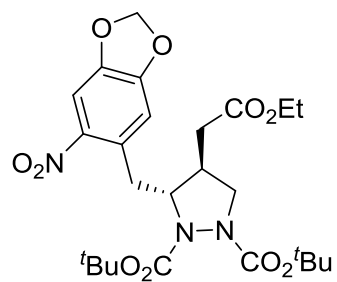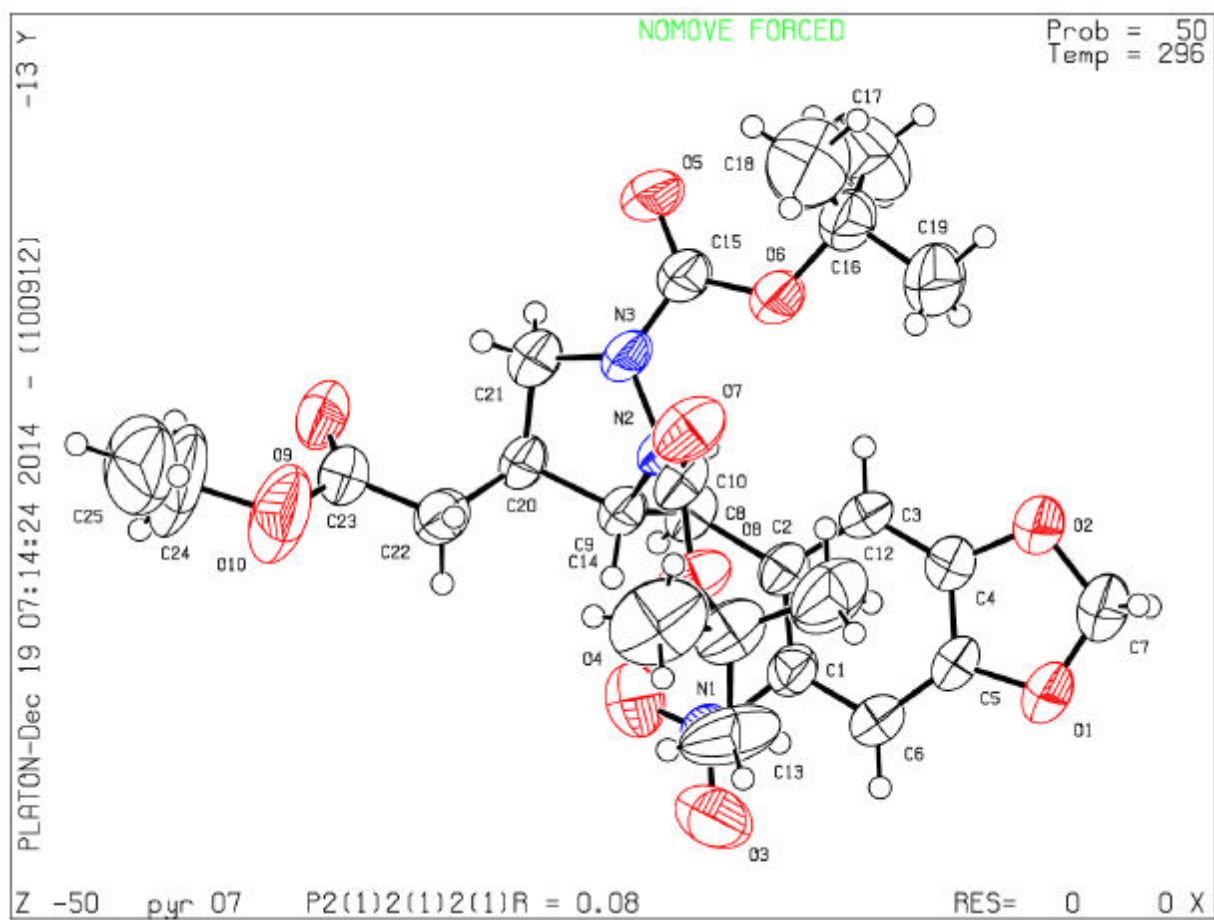

|                                                                       |                                                                |
|-----------------------------------------------------------------------|----------------------------------------------------------------|
|                                                                       | <b>4f</b>                                                      |
| Mol. Formula                                                          | C <sub>25</sub> H <sub>34</sub> N <sub>3</sub> O <sub>10</sub> |
| <i>Mr</i>                                                             | 536.55                                                         |
| <i>Temp.</i> (K)                                                      | 296(2)                                                         |
| Crystal System                                                        | Orthorhombic                                                   |
| Space group                                                           | <i>P2(1)2(1)2(1)</i>                                           |
| <i>a</i> /Å                                                           | 10.9122(16)                                                    |
| <i>b</i> /Å                                                           | 11.4715(18)                                                    |
| <i>c</i> /Å                                                           | 23.486(3)                                                      |
| <i>α</i> /°                                                           | 90                                                             |
| <i>β</i> /°                                                           | 90                                                             |
| <i>γ</i> /°                                                           | 90                                                             |
| <i>V</i> /Å <sup>3</sup>                                              | 2939.9(8)                                                      |
| <i>Z</i> , <i>D</i> <sub>calc</sub> /g cm <sup>-3</sup>               | 4, 1.212                                                       |
| <i>μ</i> /mm <sup>-1</sup>                                            | 0.094                                                          |
| F (000)                                                               | 1140                                                           |
| <i>θ</i> max/°                                                        | 25.00                                                          |
| Absor.correction                                                      | multi-scan                                                     |
| Refln. collected                                                      | 11426                                                          |
| Unique Refln.                                                         | 5061                                                           |
| Observed Refln.                                                       | 3619                                                           |
| <i>R</i> <sub>int</sub>                                               | 0.0749                                                         |
| No. of Parameter                                                      | 350                                                            |
| <i>R</i> <sub>1_obs</sub> , <i>R</i> <sub>1_all</sub>                 | 0.0774, 0.1004                                                 |
| <i>wR</i> <sub>2_obs</sub> , <i>wR</i> <sub>2_all</sub>               | 0.1916, 0.2113                                                 |
| GoF                                                                   | 1.043                                                          |
| <i>Δρ</i> <sub>max</sub> , <i>Δρ</i> <sub>min</sub> /eÅ <sup>-3</sup> | 0.343, -0.287                                                  |

Crystal data table:
